# Supplementary material for: iSyTE 2.0: a database for expression-based gene discovery in the eye
Source: PubMed Central journal article supplement — Nucleic Acids Res. 2017 Sep 19;46(Database issue):D875–85. doi: 10.1093/nar/gkx837 (PMC5753381; doi:10.1093/nar/gkx837), 2017-09-19
Supplement: gkx837_supp.pdf [file gkx837_supp.pdf]

## Supplementary Data for:

### iSyTE 2.0: a database for expression-based gene discovery in the eye

Atul Kakrana<sup>1,†</sup>, Andrian Yang<sup>2,3,†</sup>, Deepti Anand<sup>4</sup>, Djordje Djordjevic<sup>2,3</sup>, Deepti Ramachandrani<sup>4</sup>, Abhyudai Singh<sup>1,5</sup>, Hongzhan Huang<sup>1</sup>, Joshua W. K. Ho<sup>2,3,\*</sup>, Salil A. Lachke<sup>1,5,\*</sup>

<sup>1</sup> Center for Bioinformatics and Computational Biology, University of Delaware, Newark, DE, USA

<sup>2</sup> Victor Chang Cardiac Research Institute, Darlinghurst, NSW, Australia

<sup>3</sup> The University of New South Wales, Sydney, NSW, Australia

<sup>4</sup> Department of Biological Sciences, University of Delaware, Newark, DE, USA

<sup>5</sup> Department of Electrical Engineering, University of Delaware, Newark, DE, USA

<sup>†</sup> The authors wish it to be known that, in their opinion, the first two authors should be regarded as joint First Authors.

\*To whom correspondence should be addressed. Tel: +1 617 9599193; Fax: +1 302 8312281; E-mail: [salil@udel.edu](mailto:salil@udel.edu)

Correspondence may also be addressed to Joshua W. K. Ho. Tel: +61 2 9295 8645; Fax: +61 2 9295 8601; E-mail: [j.ho@victorchang.edu.au](mailto:j.ho@victorchang.edu.au)

## SUPPLEMENTARY FIGURE S1.

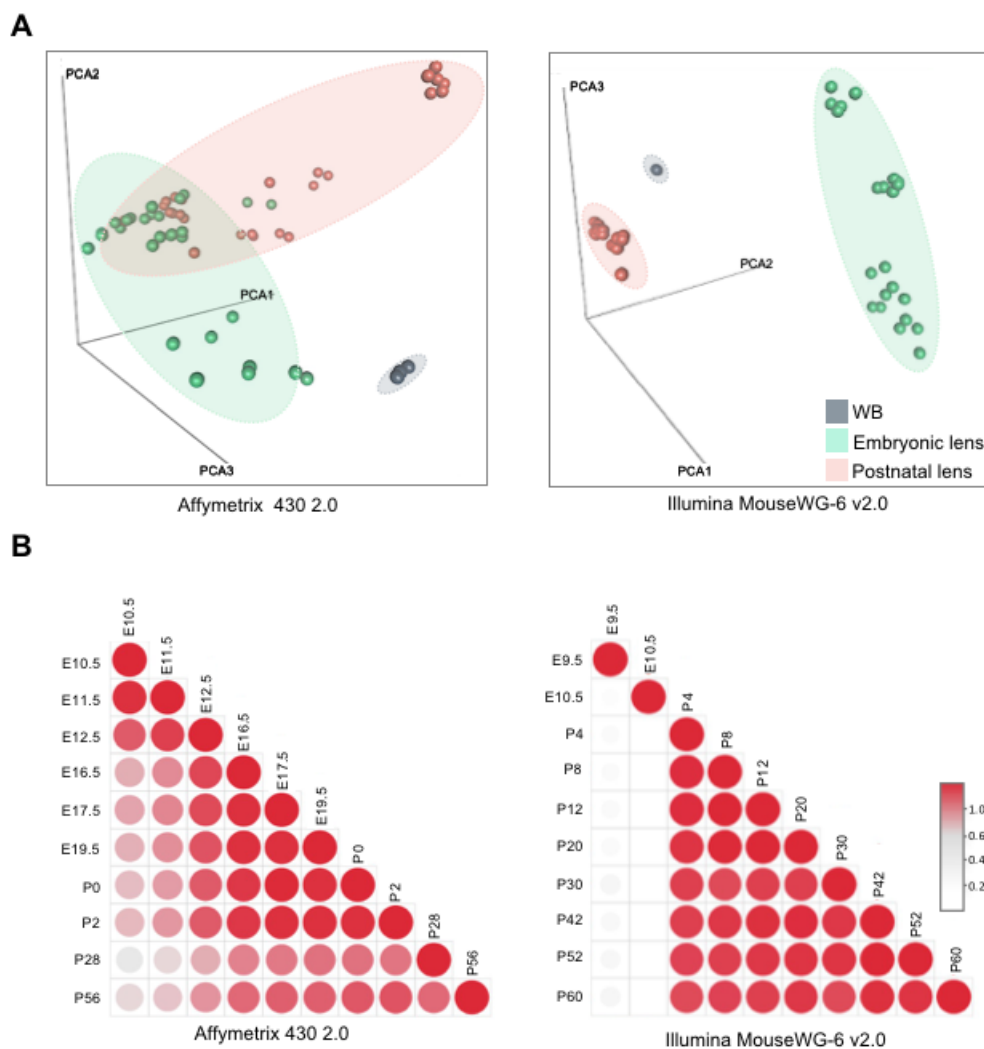

**SUPPLEMENTARY FIGURE 1. Quality analysis of lens microarray datasets at embryonic, postnatal and adult stages.** (A) Principle component analysis (PCA) of normalized data from Affymetrix Mouse 430 2.0 and Illumina MouseWG-6 v2.0 microarray platforms along with platform-specific embryonic whole body (WB) control datasets. The plots showed a segregation of data in three main groups corresponding to embryonic (green), postnatal (pink) and WB control (grey). The colored ellipsoid indicates specific data group. (B) Correlation dot plot representing Pearson's correlation values for all-versus-all comparisons of the normalized, processed data. The color and size of dots indicate degree of consensus between datasets.

## SUPPLEMENTARY FIGURE S2.

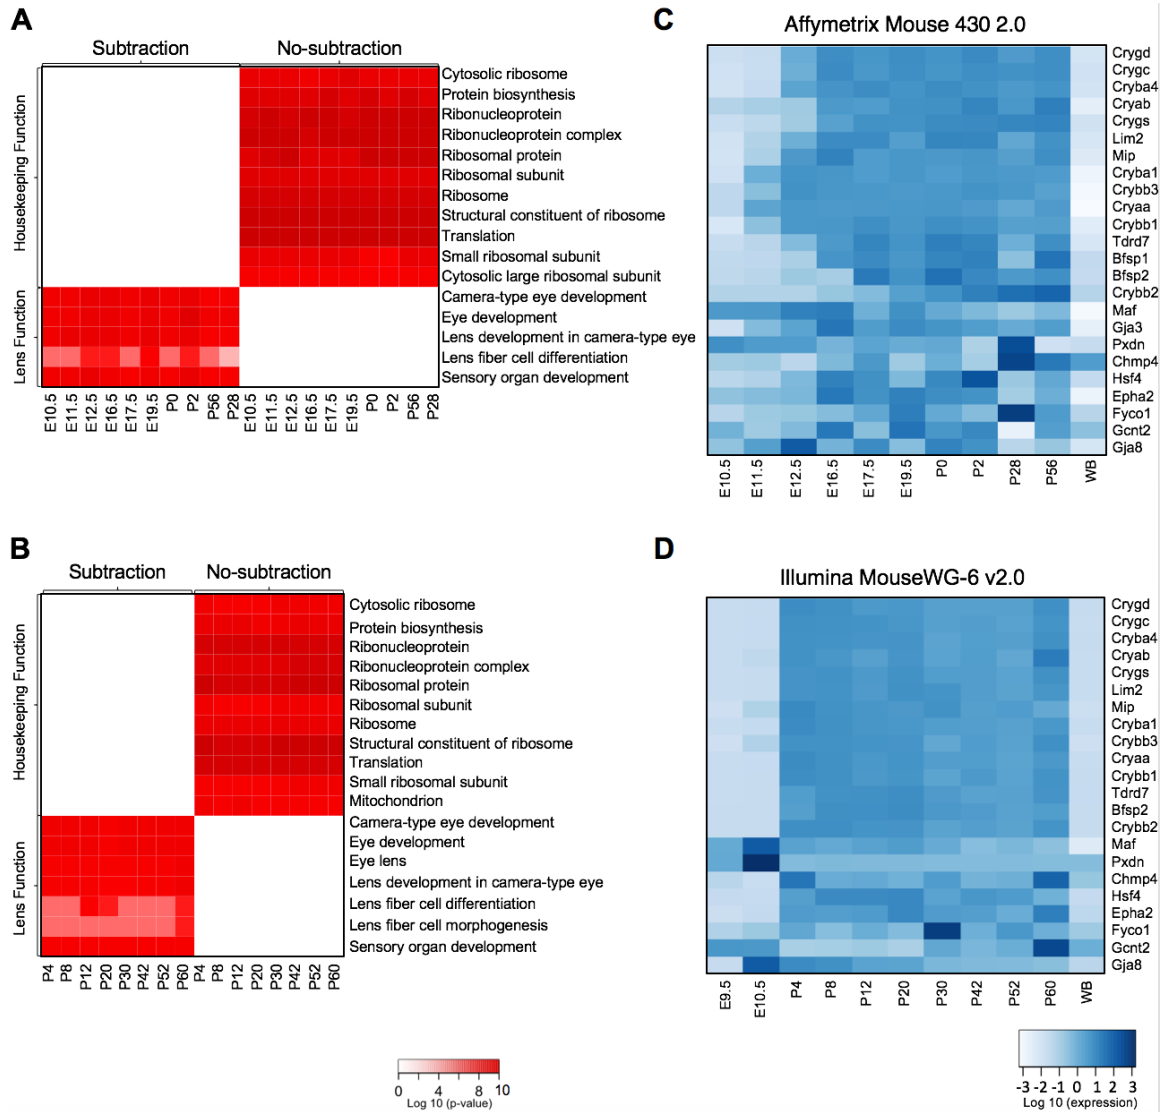

**SUPPLEMENTARY FIGURE 2. *In silico* WB-subtraction identifies lens tissue-enriched genes in embryonic, postnatal and adult lenses.** The top 500 highly ranked genes with and without WB subtraction from (A) Affymetrix Mouse 430 2.0 datasets for isolated whole lens tissue at stages E10.5, E11.5, E12.5, E16.5, E17.5, E19.5, P0, P2, P56, and from isolated lens epithelium at P28, and (B) Illumina MouseWG-6 v2.0 datasets from isolated whole lens tissue at stages P4, P8, P12, P20, P30, P42, P52, P60, were tested for gene ontology (GO) functional categories. The obtained statistically significant GO categories (Fisher's exact test and Bonferroni corrected  $p$ -value ( $p < 0.05$ )) with and without WB subtraction were visualized in the heat map. Heat map (red) intensity reflects statistically significant gene set enrichment. (C) Heat maps depicting expression of known genes linked to isolated (non-syndromic) human cataract cases in Affymetrix Mouse 430 2.0 lens datasets from stages E10.5, E11.5, E12.5, E16.5, E17.5, E19.5, P0, P2, P28 and P56 against the WB dataset and, (D) in the Illumina MouseWG-6 v2.0 lens datasets from stages E9.5, E10.5, P4, P8, P12, P20, P30, P42, P52, P60 against the WB dataset. Heat map (blue) intensity represents high to low gene expression.

## SUPPLEMENTARY FIGURE S3.

**A**

| Symbol | Rank | Dev     | Dev      | Dev      | Dev      | Dev      | Dev      | Dev      | Dev      | Dev      |
|--------|------|---------|----------|----------|----------|----------|----------|----------|----------|----------|
|        |      | E10.5   | E11.5    | E12.5    | E16.5    | E17.5    | E19.5    | P0       | P2       | P56      |
| Cryaa  | -    | 6096.34 | 22231.29 | 26968.79 | 26084.9  | 26887.72 | 27032.72 | 27180.48 | 25970.2  | 25995.96 |
| Cryab  | -    | 4051.36 | 5326.39  | 6239.69  | 18040.61 | 16928.76 | 19925.06 | 20418.22 | 23520.56 | 25273.56 |
| Cryba1 | -    | 2454.95 | 18264.48 | 28381.95 | 27502.56 | 24954.36 | 27102.99 | 24817.04 | 27257.21 | 25392.33 |
| Cryba4 | -    | 35.72   | 639.56   | 15661.34 | 21856.6  | 24935.58 | 21977.31 | 24851.24 | 23108.17 | 22000.5  |
| Crybb1 | -    | 428.27  | 10518.47 | 25522.76 | 25844.13 | 28954.47 | 25627.46 | 29168.25 | 27191.04 | 22185.05 |
| Crybb2 | -    | 89.41   | 108.12   | 115.05   | 1270.79  | 2672.05  | 8290.19  | 11947.88 | 17744.73 | 27794.09 |
| Crybb3 | -    | 5597.31 | 13149.38 | 27963.55 | 26321.33 | 26031    | 25269.45 | 25920.99 | 27533.09 | 22585.4  |
| Crygb  | -    | 25.32   | 208.27   | 10667.41 | 24642    | 19873.19 | 23485.56 | 20608.36 | 23628.24 | 23446.76 |
| Crygd  | -    | 273.12  | 554.12   | 13411.12 | 26053    | 22602.36 | 26042.58 | 23339.43 | 27073.42 | 25517.17 |
| Crygs  | -    | 228.36  | 885.45   | 3138.64  | 13952.11 | 19483.63 | 19210.45 | 21787.82 | 22036.03 | 24560.78 |

**B**

| Symbol | Rank | Dev    | Dev    | Dev     | Dev     | Dev     | Dev     | Dev     | Dev     | Dev     |
|--------|------|--------|--------|---------|---------|---------|---------|---------|---------|---------|
|        |      | E10.5  | E11.5  | E12.5   | E16.5   | E17.5   | E19.5   | P0      | P2      | P56     |
| Cryaa  | -    | 300.04 | 693.14 | 909.54  | 877.95  | 897.02  | 902.01  | 907.03  | 869.48  | 867.07  |
| Cryab  | -    | 31.34  | 39.92  | 45.57   | 124.59  | 120.51  | 139.2   | 141.93  | 162.92  | 176.56  |
| Cryba1 | -    | 192.27 | 648.07 | 1092.94 | 1070.45 | 979.57  | 1060.85 | 967.42  | 1070.45 | 993.93  |
| Cryba4 | -    | 10.68  | 38.56  | 778.2   | 1068.97 | 1235.6  | 1082.39 | 1234.75 | 1139.35 | 1083.89 |
| Crybb1 | -    | 24.29  | 180.27 | 437.76  | 447.27  | 496.97  | 446.65  | 509.88  | 470.81  | 386.68  |
| Crybb2 | -    | 2.26   | 2.56   | 2.6     | 32.36   | 59.3    | 192.67  | 289.82  | 413     | 651.22  |
| Crybb3 | -    | 106.45 | 194.42 | 375.33  | 372.48  | 364.81  | 354.1   | 363.8   | 391.54  | 316.49  |
| Crygb  | -    | 11.55  | 13.37  | 749.61  | 1691.4  | 1392.06 | 1645.15 | 1456.21 | 1661.19 | 1644.01 |
| Crygd  | -    | 61.78  | 46.98  | 871.89  | 1682.04 | 1444.15 | 1673.9  | 1514.89 | 1752.26 | 1640.59 |
| Crygs  | -    | 35.33  | 47.11  | 198.91  | 907.66  | 1195.17 | 1193.51 | 1355.87 | 1366.25 | 1525.43 |

**SUPPLEMENTARY FIGURE 3. Lens expression and enriched expression of crystallin genes in iSyTE 2.0.** (A) Expression and (B) enrichment of ten crystallin-encoding genes in nine stages of lens (E10.5, E11.5, E12.5, E16.5, E17.5, E19.5, P0, P2, P56) as indicated by the processed Affymerix microarray datasets on the iSyTE 2.0 web-interface.

## SUPPLEMENTARY FIGURE S4.

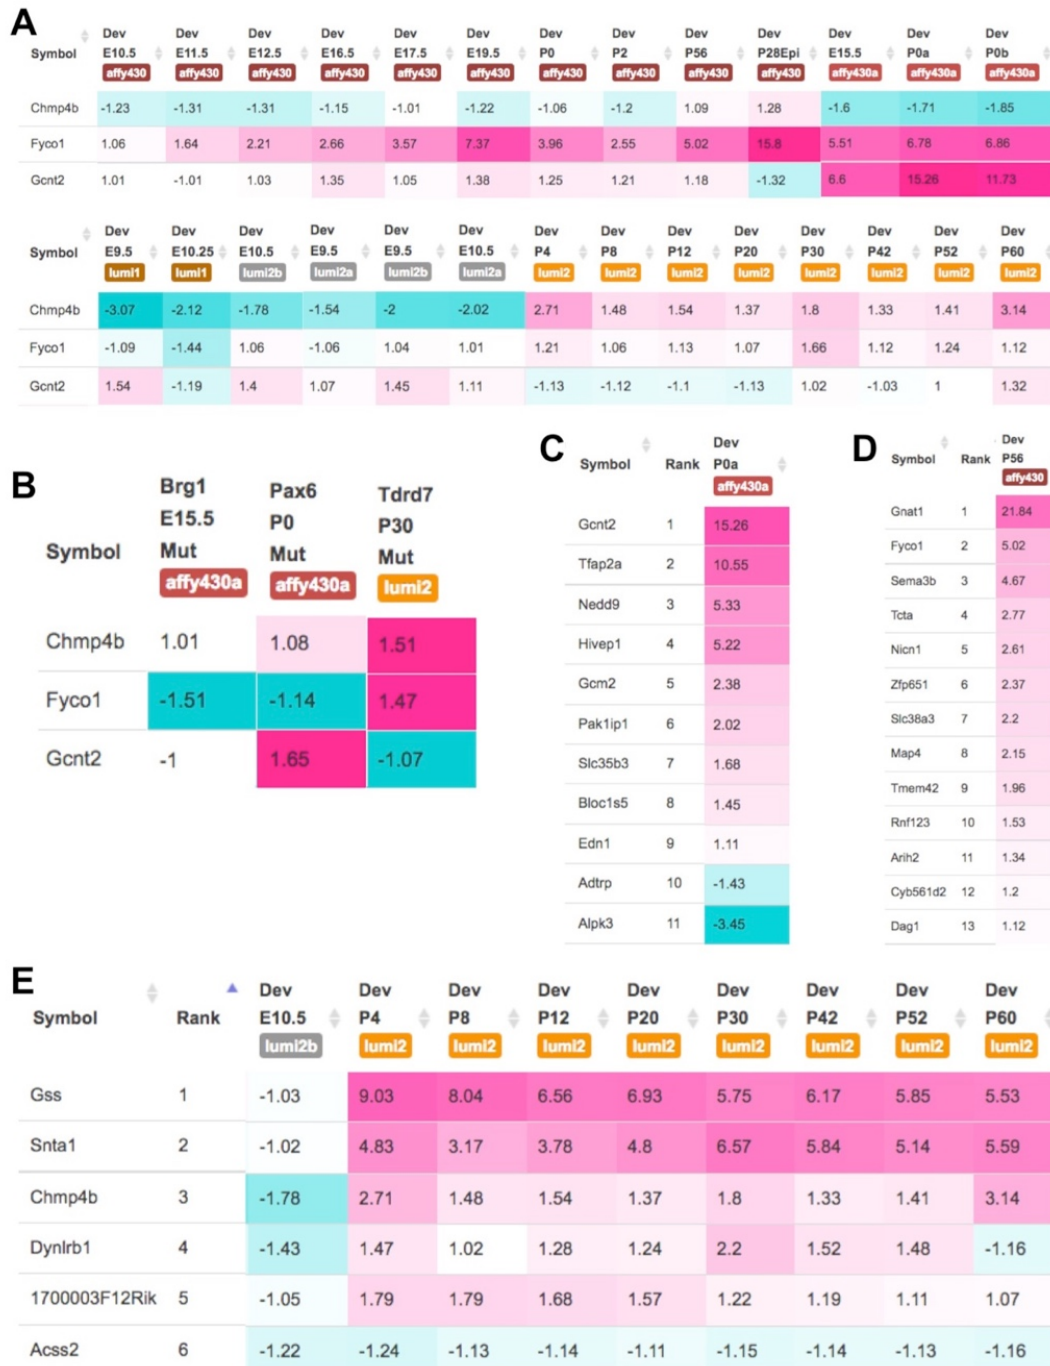

**SUPPLEMENTARY FIGURE 4. Analysis of the human non-syndromic cataract genes *Chmp4b*, *Fyco1*, *Gcnt2* in iSyTE 2.0. (A)** Lens-enriched expression of the three cataract-linked genes in Affymetrix and Illumina microarrays. **(B)** Differential expression of *Chmp4b*, *Fyco1*, *Gcnt2* in *Brg1*, *Pax6* and *Tdrd7* mutant lenses. **(C-E)** Improved ranking of *Gcnt2*, *Fyco1* and *Chmp4b* in the original mapped intervals linked to cataract.

## SUPPLEMENTARY FIGURE S5.

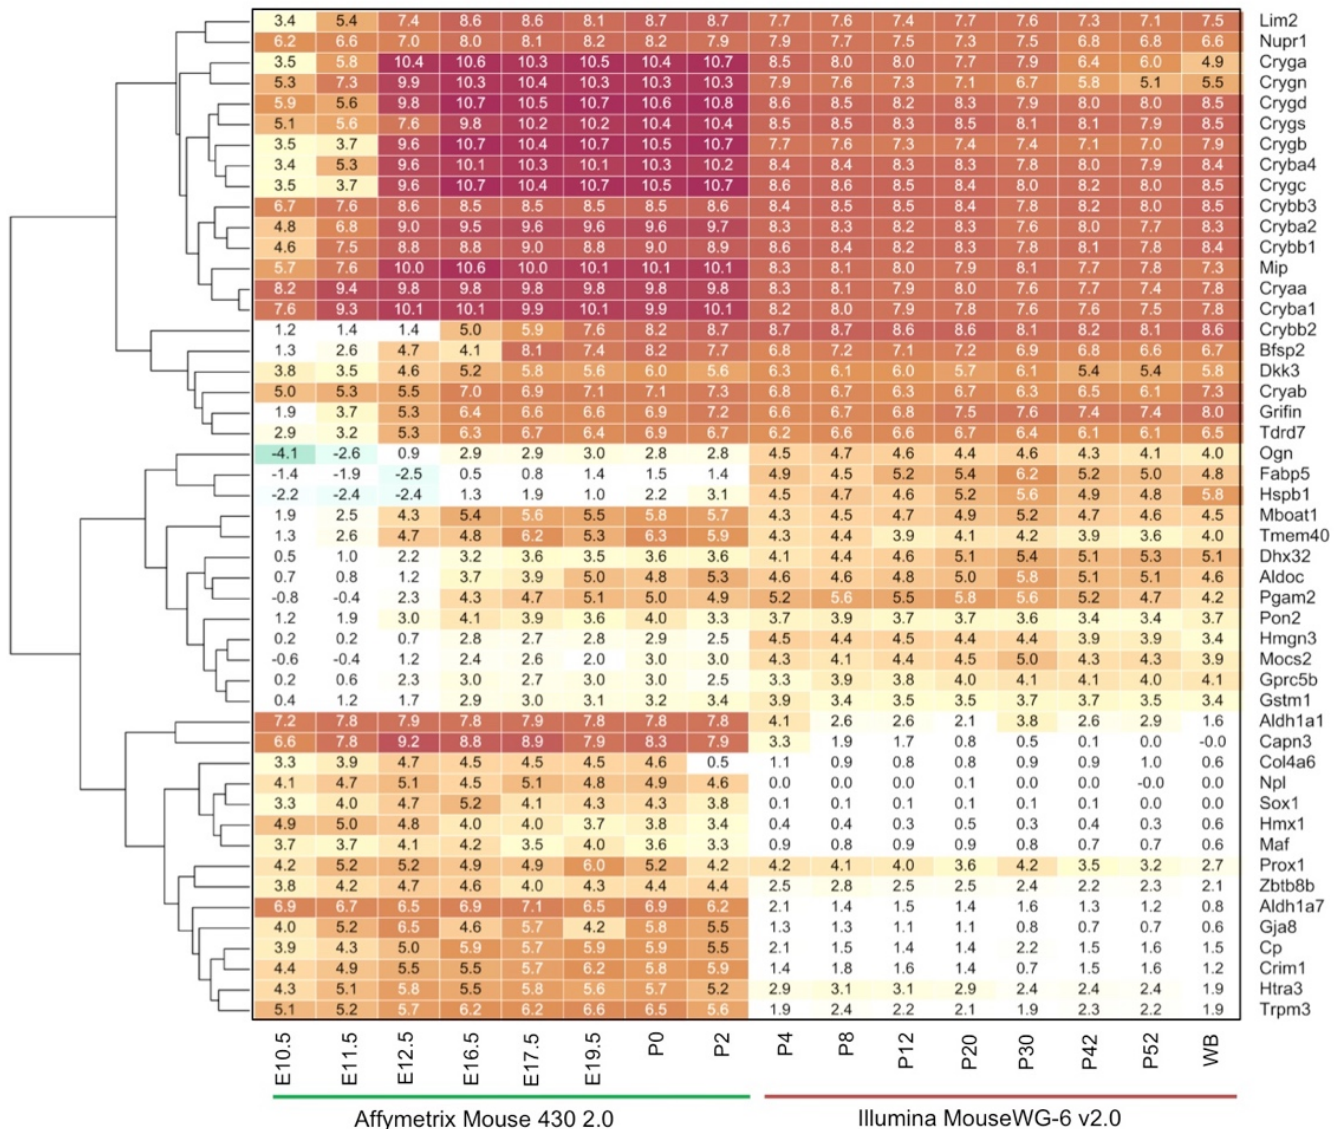

**SUPPLEMENTARY FIGURE 5. Derivation of a molecular signature gene set for mouse embryonic and postnatal lens.** Genes enriched ( $FC \geq 10$  fold) in embryonic or postnatal stages of lens development. Because a large number of embryonic lens microarrays were performed on the Affymetrix platform and a large number of postnatal lens microarrays were performed on the Illumina platform, these platform-specific datasets were analyzed to infer embryonic and postnatal lens molecular signatures, respectively. Values represent lens enrichment in  $\log_2$  scale.

## SUPPLEMENTARY FIGURE S6.

**iSyTE** Integrated Systems Tool for Eye gene discovery

Home About Gene Expression Contacts

---

Lens Gene Expression

Standard **Co-expression** Lens-enrichment in UCSC Browser

Query gene:  Select species:  Mouse mm10  Human hg19

Limit by: **1. Input query gene**

Threshold (Pearson Correlation > 0.75 or < -0.75)  N most correlated genes

**2. Select parameters and submit**

**3. View genes co-expressed with query**

Filter records:

| Query | Target   | Correlation score |
|-------|----------|-------------------|
| Cryga | Crygn    | 0.996958          |
| Cryga | Lim2     | 0.994457          |
| Cryga | Spg7     | 0.994243          |
| Cryga | Crygb    | 0.994211          |
| Cryga | Crybb1   | 0.994203          |
| Cryga | Tmem126a | 0.993859          |
| Cryga | Cryba4   | 0.993747          |
| Cryga | Grina    | 0.993683          |
| Cryga | Ogn      | 0.992951          |
| Cryga | Mip      | 0.99227           |

Showing 1 to 10 of 10 entries

**SUPPLEMENTARY FIGURE 6. iSyTE 2.0 has a new feature to determine co-expressed genes.** Candidate genes that exhibit co-expression with a query gene can be searched using the Co-expression feature. This can be achieved by entering the candidate gene under the “query gene” (*Cryga* in the example above), and selecting the threshold for Pearson Correlation and the top number of correlated genes to be visualized as shown in steps 1-3.

## SUPPLEMENTARY FIGURE S7.

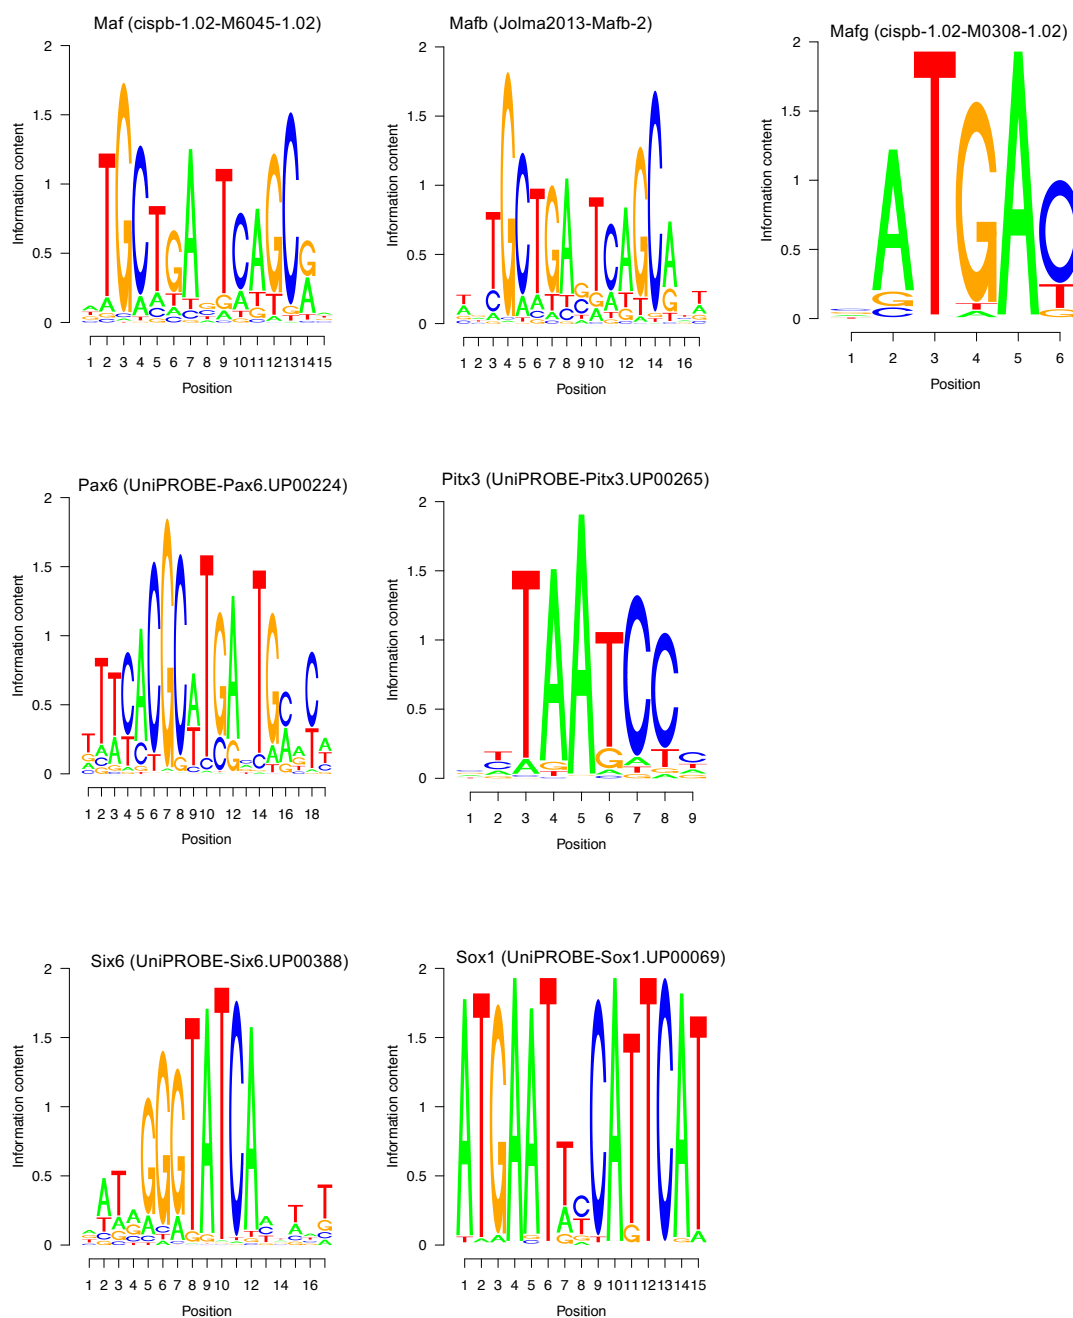

**SUPPLEMENTARY FIGURE 7. Transcription factor-Motifs used in expression-based gene regulatory network analysis.** Transcription factor binding motifs for Maf, Mafb, Mafg, Pax6, Pitx3, Six6 and Sox1 were obtained from MotifDB and used to search the -2500bp upstream of the transcription start site in the 528 genes from the clusters identified by SOTA.



## SUPPLEMENTARY FIGURE S8.

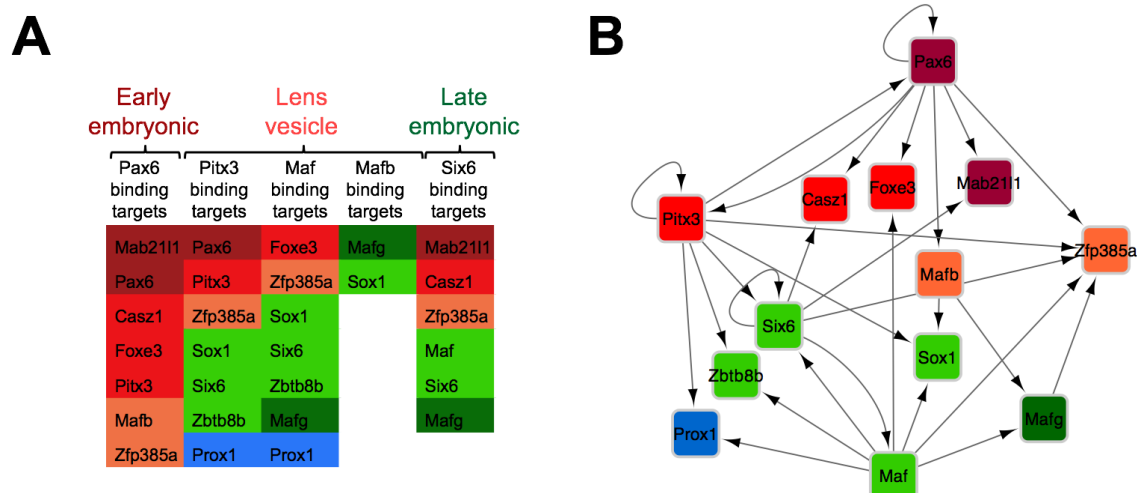

**SUPPLEMENTARY FIGURE 8. Transcription factor regulatory network predicted using iSyTE 2.0.** Regulatory connections between the transcription factors in the SOTA clusters were investigated for new insights into the temporal dynamics of their expression and that of their targets in the lens. (A) Transcription factor binding motif analysis for the proteins Pax6, Pitx3, Maf, Mafb and Six6 identifies putative binding sites in the -2500bp region upstream of the transcription start site within other transcription factor-encoding genes present in six clusters. Notably, we find Pax6 binding sites upstream of majority of the transcription factor genes that exhibit peak expression early in lens development. Indeed, six of nineteen potential transcription factor targets of Pax6 are in the early lens development, lens vesicle or primary fiber differentiation clusters. Conversely, the lens vesicle cluster transcription factors Pitx3, Maf, and Mafb as well as the late embryonic cluster transcription factors Six6 have binding sites upstream of other transcription factor genes, majority of which exhibit peak expression in lens vesicle stage and beyond. (B) Network representation of transcription factors based on the presence of their binding motif in other transcription factors expressed in the lens. This analysis suggests their temporal hierarchy in the lens.

**Supplementary Table S1. Mouse lens microarray datasets used in iSyTE 2.0.**

| Dataset     | Mouse Stage | GEO accession | Tissue       | Genotype                                       | Microarray platform | Reference |
|-------------|-------------|---------------|--------------|------------------------------------------------|---------------------|-----------|
| Development | E9.5        | GSE49227      | Lens placode | Wild-type                                      | Illumina WG-6 v1.1  | (1)       |
| Development | E9.5        | GSE49223      | Lens placode | Wild-type                                      | Illumina WG-6 v2.0  | (2)       |
| Development | E9.5        | GSE49229      | Lens placode | Wild-type                                      | Illumina WG-6 v2.0  | (1)       |
| Development | E10.25      | GSE49216      | Lens pit     | Wild-type                                      | Illumina WG-6 v1.1  | (1)       |
| Development | E10.5       | GSE49218      | Lens pit     | Wild-type                                      | Illumina WG-6 v2.0  | (2)       |
| Development | E10.5       | GSE32334      | Lens pit     | Wild-type                                      | Affymetrix 430 2.0  | (3)       |
| Development | E11.5       | GSE32334      | Lens vesicle | Wild-type                                      | Affymetrix 430 2.0  | (3)       |
| Development | E12.5       | GSE32334      | Lens         | Wild-type                                      | Affymetrix 430 2.0  | (3)       |
| Development | E15.5       | GSE22322      | Lens         | Wild-type                                      | Affymetrix 430A 2.0 | (4)       |
| Development | E16.5       | GSE47694      | Lens         | Wild-type                                      | Affymetrix 430 2.0  | (5)       |
| Development | E17.5       | GSE16533      | Lens         | <i>E2f2</i> <sup>-/-</sup> (no lens phenotype) | Affymetrix 430 2.0  | (6)       |

|             |       |           |                 |                                                |                     |            |
|-------------|-------|-----------|-----------------|------------------------------------------------|---------------------|------------|
| Development | E19.5 | GSE31643  | Lens            | <i>Notch2<sup>loxP:loxP</sup></i>              | Affymetrix 430 2.0  | (7)        |
| Development | P0    | GSE22362  | Lens            | Wild-type                                      | Affymetrix 430A 2.0 | (4)        |
| Development | P0    | GSE16533  | Lens            | <i>E2f2</i> <sup>-/-</sup> (no lens phenotype) | Affymetrix 430 2.0  | (6)        |
| Development | P2    | GSE9711   | Lens            | Wild-type                                      | Affymetrix 430 2.0  | (8)        |
| Development | P4    | GSE25775  | Lens            | <i>Tdrd7</i> <sup>+/-</sup>                    | Illumina WG-6 v2.0  | (9)        |
| Development | P8    | GSE100136 | Lens            | Wild-type                                      | Illumina WG-6 v2.0  | This study |
| Development | P12   | GSE100136 | Lens            | Wild-type                                      | Illumina WG-6 v2.0  | This study |
| Development | P20   | GSE100136 | Lens            | Wild-type                                      | Illumina WG-6 v2.0  | This study |
| Development | P28   | GSE13402  | Lens epithelium | Wild-type                                      | Affymetrix 430 2.0  | (10)       |
| Development | P30   | GSE25776  | Lens            | <i>Tdrd7</i> <sup>+/-</sup>                    | Illumina WG-6 v2.0  | (9)        |
| Development | P42   | GSE100136 | Lens            | Wild-type                                      | Illumina WG-6 v2.0  | This study |
| Development | P52   | GSE100136 | Lens            | Wild-type                                      | Illumina WG-6 v2.0  | This study |
| Development | P56   | GSE47694  | Lens            | Wild-type                                      | Affymetrix 430 2.0  | (5)        |

|             |        |          |              |                                                                                              |                     |      |
|-------------|--------|----------|--------------|----------------------------------------------------------------------------------------------|---------------------|------|
| Development | P60    | GSE65500 | Lens         | <i>Mafg</i> <sup>+/-</sup> : <i>Mafk</i> <sup>+/-</sup>                                      | Illumina WG-6 v2.0  | (11) |
| Mutant      | E9.5   | GSE49227 | Lens placode | <i>Le-Cre:Pax6</i> <sup>loxP:loxP</sup>                                                      | Illumina WG-6 v1.1  | (1)  |
| Mutant      | E9.5   | GSE49223 | Lens placode | <i>Le-Cre:Cbp</i> <sup>loxP/loxP</sup> : <i>p300</i> <sup>loxP/loxP</sup>                    | Illumina WG-6 v2.0  | (2)  |
| Mutant      | E9.5   | GSE49229 | Lens placode | <i>Le-Cre:Pax6</i> <sup>loxP:loxP</sup>                                                      | Illumina WG-6 v2.0  | (1)  |
| Mutant      | E10.25 | GSE49216 | Lens pit     | <i>Le-Cre:Pax6</i> <sup>loxP:loxP</sup>                                                      | Illumina WG-6 v1.1  | (1)  |
| Mutant      | E10.5  | GSE49218 | Lens pit     | <i>Le-Cre:Cbp</i> <sup>loxP/loxP</sup> : <i>p300</i> <sup>loxP/loxP</sup>                    | Illumina WG-6 v2.0  | (2)  |
| Mutant      | E15.5  | GSE22322 | Lens         | <i>Brg1</i> dominant -ve                                                                     | Affymetrix 430A 2.0 | (4)  |
| Mutant      | E16.5  | GSE47694 | Lens         | <i>Le-Cre:Klf4</i> <sup>loxP:loxP</sup>                                                      | Affymetrix 430 2.0  | (5)  |
| Mutant      | E17.5  | GSE16533 | Lens         | <i>Cry-Cre:E2f1</i> <sup>-/-</sup> : <i>E2F2</i> <sup>-/-</sup> : <i>E2F3</i> <sup>-/-</sup> | Affymetrix 430 2.0  | (6)  |
| Mutant      | E19.5  | GSE31643 | Lens         | <i>Le-Cre:Notch2</i> <sup>loxP:loxP</sup>                                                    | Affymetrix 430 2.0  | (7)  |
| Mutant      | P0     | GSE22362 | Lens         | <i>Hsf4</i> <sup>-/-</sup>                                                                   | Affymetrix 430A 2.0 | (4)  |
| Mutant      | P0     | GSE16533 | Lens         | <i>Cry-Cre:E2f1</i> <sup>-/-</sup> : <i>E2F2</i> <sup>-/-</sup> : <i>E2F3</i> <sup>-/-</sup> | Affymetrix 430 2.0  | (6)  |
| Mutant      | P2     | GSE9711  | Lens         | <i>Cryaa-Foxe3</i> overexpress.                                                              | Affymetrix 430 2.0  | (8)  |

|        |     |          |                 |                                                         |                    |      |
|--------|-----|----------|-----------------|---------------------------------------------------------|--------------------|------|
| Mutant | P4  | GSE25775 | Lens            | <i>Tdrd7</i> <sup>-/-</sup>                             | Illumina WG-6 v2.0 | (9)  |
| Mutant | P28 | GSE13402 | Lens epithelium | <i>Sparc</i> <sup>-/-</sup>                             | Affymetrix 430 2.0 | (10) |
| Mutant | P30 | GSE25776 | Lens            | <i>Tdrd7</i> <sup>-/-</sup>                             | Illumina WG-6 v2.0 | (9)  |
| Mutant | P56 | GSE47694 | Lens            | <i>Le-Cre:Klf4</i> <sup>loxP:loxP</sup>                 | Affymetrix 430 2.0 | (5)  |
| Mutant | P60 | GSE65500 | Lens            | <i>Mafg</i> <sup>-/-</sup> : <i>Mafk</i> <sup>+/-</sup> | Illumina WG-6 v2.0 | (11) |

## REFERENCES

1. Huang,J., Rajagopal,R., Liu,Y., Dattilo,L.K., Shaham,O., Ashery-Padan,R. and Beebe,D.C. (2011) The mechanism of lens placode formation: a case of matrix-mediated morphogenesis. *Dev. Biol.*, **355**, 32–42.
2. Wolf,L., Harrison,W., Huang,J., Xie,Q., Xiao,N., Sun,J., Kong,L., Lachke,S.A., Kuracha,M.R., Govindarajan,V., *et al.* (2013) Histone posttranslational modifications and cell fate determination: lens induction requires the lysine acetyltransferases CBP and p300. *Nucleic Acids Res.*, **41**, 10199–10214.
3. Lachke,S.A., Ho,J.W.K., Kryukov,G.V., O’Connell,D.J., Aboukhalil,A., Bulyk,M.L., Park,P.J. and Maas,R.L. (2012) iSyTE: integrated Systems Tool for Eye gene discovery. *Invest. Ophthalmol. Vis. Sci.*, **53**, 1617–1627.
4. He,S., Purity,M.K., Wang,W.-L., Wolf,L., Chauhan,B.K., Cveklova,K., Tamm,E.R., Ashery-Padan,R., Metzger,D., Nakai,A., *et al.* (2010) Chromatin remodeling enzyme Brg1 is required for mouse lens fiber cell terminal differentiation and its denucleation. *Epigenetics Chromatin*, **3**, 21.
5. Gupta,D., Harvey,S.A.K., Kenchegowda,D., Swamynathan,S. and Swamynathan,S.K. (2013) Regulation of mouse lens maturation and gene expression by Krüppel-like factor 4. *Exp. Eye Res.*, **116**, 205–218.
6. Wenzel,P.L., Chong,J.-L., Sáenz-Robles,M.T., Ferrey,A., Hagan,J.P., Gomez,Y.M., Rajmohan,R., Sharma,N., Chen,H.-Z., Pipas,J.M., *et al.* (2011) Cell proliferation in the absence of E2F1-3. *Dev. Biol.*, **351**, 35–45.
7. Saravanamuthu,S.S., Le,T.T., Gao,C.Y., Cojocar,R.I., Pandiyan,P., Liu,C., Zhang,J., Zelenka,P.S. and Brown,N.L. (2012) Conditional ablation of the Notch2 receptor in the ocular lens. *Dev. Biol.*, **362**, 219–229.
8. Landgren,H., Blixt,A. and Carlsson,P. (2008) Persistent FoxE3 expression blocks cytoskeletal remodeling and organelle degradation during lens fiber differentiation. *Invest. Ophthalmol. Vis. Sci.*, **49**, 4269–4277.
9. Lachke,S.A., Alkuraya,F.S., Kneeland,S.C., Ohn,T., Aboukhalil,A., Howell,G.R., Saadi,I., Cavallisco,R., Yue,Y., Tsai,A.C.-H., *et al.* (2011) Mutations in the RNA granule component TDRD7 cause cataract and glaucoma. *Science*, **331**, 1571–1576.
10. Greiling,T.M.S., Stone,B. and Clark,J.I. (2009) Absence of SPARC leads to impaired lens circulation. *Exp. Eye Res.*, **89**, 416–425.
11. Agrawal,S.A., Anand,D., Siddam,A.D., Kakrana,A., Dash,S., Scheiblin,D.A., Dang,C.A., Terrell,A.M., Waters,S.M., Singh,A., *et al.* (2015) Compound mouse mutants of bZIP transcription factors Mafg and Mafk reveal a regulatory network of non-crystallin genes associated with cataract. *Hum. Genet.*, **134**, 717–735.

## Supplementary Table S2. Expression-based clustering analysis of Affymetrix genes

| Gene.Sy<br>mbol   | res.c<br>lust | Expressio<br>n_E10.5 | Expressio<br>n_E11.5 | Expressio<br>n_E12.5 | Expressio<br>n_E16.5 | Expressio<br>n_E17.5 | Expressio<br>n_E19.5 | Expressi<br>on_P0 | Expressi<br>on_P2 | Expressi<br>on_P56 | Enrichmen<br>t_E10.5 | Enrichmen<br>t_E11.5 | Enrichmen<br>t_E12.5 | Enrichmen<br>t_E16.5 | Enrichmen<br>t_E17.5 | Enrichmen<br>t_E19.5 | Enrichm<br>ent_P0 | Enrichm<br>ent_P2 | Enrichme<br>nt_P56 |
|-------------------|---------------|----------------------|----------------------|----------------------|----------------------|----------------------|----------------------|-------------------|-------------------|--------------------|----------------------|----------------------|----------------------|----------------------|----------------------|----------------------|-------------------|-------------------|--------------------|
| Nupr1             | 1             | 1956.9               | 2464.7               | 3493.2               | 6979.6               | 7155.8               | 7761.3               | 7356.5            | 6505.3            | 10098.6            | 74.0                 | 97.9                 | 124.8                | 253.0                | 279.2                | 298.8                | 286.0             | 232.5             | 388.8              |
| Grifin            | 1             | 158.9                | 788.4                | 2567.1               | 5023.6               | 5977.6               | 6204.7               | 7366.0            | 9442.2            | 17842.4            | 3.8                  | 12.7                 | 40.1                 | 85.4                 | 96.3                 | 100.4                | 118.9             | 152.0             | 288.4              |
| Sox2ot            | 1             | 229.3                | 351.7                | 481.3                | 202.5                | 503.2                | 719.7                | 651.7             | 656.5             | 1123.4             | 23.9                 | 32.1                 | 41.1                 | 26.5                 | 46.0                 | 66.2                 | 60.2              | 60.8              | 103.3              |
| Cela1             | 1             | 386.5                | 518.5                | 1484.5               | 2347.4               | 2409.9               | 860.4                | 2491.5            | 1922.2            | 3120.6             | 11.5                 | 15.7                 | 42.6                 | 65.7                 | 70.0                 | 24.9                 | 72.2              | 54.9              | 90.4               |
| Crybb2            | 1             | 89.4                 | 108.1                | 115.0                | 1270.8               | 2672.0               | 8290.2               | 11947.9           | 17744.7           | 27794.1            | 2.3                  | 2.6                  | 2.6                  | 32.4                 | 59.3                 | 192.7                | 289.8             | 413.0             | 651.2              |
| Smco3             | 1             | 26.6                 | 45.9                 | 84.8                 | 1048.3               | 1452.1               | 1225.2               | 1605.1            | 1784.5            | 2395.3             | 2.2                  | 3.5                  | 6.8                  | 89.4                 | 122.9                | 101.7                | 134.1             | 153.6             | 199.5              |
| Clu               | 1             | 2023.0               | 2827.6               | 4907.8               | 7319.4               | 4053.7               | 4863.9               | 7096.4            | 8225.6            | 17433.7            | 8.9                  | 10.4                 | 21.7                 | 33.2                 | 18.0                 | 21.9                 | 28.7              | 37.7              | 78.6               |
| Mboat1            | 1             | 138.7                | 329.4                | 1030.6               | 2089.8               | 2417.4               | 2238.7               | 2862.9            | 2709.0            | 5531.9             | 3.6                  | 5.6                  | 19.7                 | 42.3                 | 49.5                 | 45.3                 | 57.7              | 52.9              | 111.9              |
| Gpr160            | 1             | 34.1                 | 84.1                 | 400.4                | 942.2                | 1543.7               | 829.2                | 1625.7            | 836.4             | 2788.7             | 2.0                  | 3.3                  | 19.1                 | 43.5                 | 72.4                 | 39.2                 | 75.2              | 40.5              | 131.4              |
| Anxa1             | 1             | 2615.1               | 1784.2               | 1347.0               | 2686.0               | 2702.6               | 2096.5               | 2835.4            | 3050.6            | 7572.4             | 17.6                 | 11.5                 | 9.2                  | 18.5                 | 17.2                 | 14.4                 | 19.3              | 21.8              | 52.0               |
| E1302181<br>03Rik | 1             | 185.3                | 167.5                | 155.3                | 201.0                | 205.2                | 180.9                | 217.3             | 75.3              | 1511.3             | 12.9                 | 8.5                  | 10.0                 | 13.7                 | 14.0                 | 12.3                 | 14.1              | 6.6               | 102.5              |
| Ass1              | 1             | 1522.1               | 1646.5               | 822.5                | 1270.4               | 841.5                | 586.5                | 1183.9            | 2614.9            | 3086.2             | 23.4                 | 26.0                 | 12.4                 | 17.8                 | 11.5                 | 7.9                  | 15.9              | 36.3              | 43.3               |
| Folr1             | 1             | 410.6                | 276.1                | 235.6                | 616.7                | 505.5                | 974.1                | 686.4             | 1358.3            | 2336.7             | 9.6                  | 6.7                  | 5.8                  | 14.6                 | 11.5                 | 23.5                 | 16.4              | 33.9              | 56.5               |
| Cyp4v3            | 1             | 246.2                | 214.7                | 210.0                | 412.2                | 441.5                | 337.3                | 484.7             | 327.5             | 845.0              | 8.4                  | 6.3                  | 7.0                  | 15.1                 | 15.4                 | 11.6                 | 16.1              | 11.4              | 29.2               |
| S100a4            | 1             | 75.6                 | 43.7                 | 90.3                 | 1202.9               | 2560.1               | 2850.4               | 3802.8            | 3009.8            | 5760.6             | 1.7                  | 1.0                  | 2.8                  | 31.1                 | 67.5                 | 74.4                 | 99.6              | 79.7              | 149.3              |
| Dnase2b           | 1             | 16.0                 | 13.0                 | 12.6                 | 1260.5               | 1246.8               | 779.5                | 1752.7            | 1663.6            | 4441.2             | 1.4                  | -1.1                 | 1.0                  | 94.5                 | 92.9                 | 56.8                 | 125.7             | 107.2             | 324.7              |
| Metnl             | 1             | 209.8                | 288.9                | 470.5                | 1057.8               | 1342.1               | 1108.4               | 1640.5            | 1117.2            | 4682.4             | 2.8                  | 3.9                  | 6.4                  | 14.0                 | 17.8                 | 14.6                 | 21.7              | 15.8              | 61.8               |
| Dapl1             | 1             | 64.7                 | 82.4                 | 69.2                 | 371.8                | 545.5                | 1696.4               | 465.5             | 1715.1            | 8734.5             | 1.8                  | 2.0                  | 1.9                  | 10.5                 | 15.9                 | 47.9                 | 11.7              | 54.4              | 246.1              |
| Aldoe             | 1             | 215.5                | 249.9                | 314.3                | 1847.3               | 2162.9               | 4608.2               | 3928.1            | 5431.1            | 11351.0            | 1.6                  | 1.8                  | 2.3                  | 13.0                 | 15.3                 | 32.8                 | 28.0              | 40.2              | 81.0               |
| Dtna              | 1             | 136.4                | 142.8                | 159.5                | 378.0                | 333.1                | 517.3                | 420.4             | 621.2             | 1673.8             | 4.4                  | 4.1                  | 5.0                  | 11.7                 | 11.4                 | 16.7                 | 13.7              | 20.0              | 54.1               |
| Gpr137b-<br>ps    | 1             | 634.2                | 895.2                | 1771.3               | 2153.7               | 1876.4               | 1949.5               | 2095.8            | 2044.7            | 3703.3             | 3.1                  | 4.4                  | 9.9                  | 12.7                 | 10.9                 | 11.2                 | 12.0              | 11.8              | 21.3               |

|                   |   |        |       |        |        |        |        |        |        |         |      |      |      |      |      |      |      |      |       |
|-------------------|---|--------|-------|--------|--------|--------|--------|--------|--------|---------|------|------|------|------|------|------|------|------|-------|
| Necab1            | 1 | 70.3   | 32.3  | 32.1   | 82.7   | 96.6   | 87.9   | 123.8  | 83.6   | 348.0   | 6.2  | 3.4  | 3.0  | 7.7  | 8.7  | 8.2  | 11.5 | 7.9  | 32.5  |
| Ngef              | 1 | 59.2   | 96.9  | 186.6  | 476.5  | 605.8  | 604.6  | 845.0  | 648.0  | 1400.5  | 1.5  | 2.5  | 4.9  | 12.5 | 16.5 | 16.6 | 23.0 | 17.4 | 38.6  |
| Kenj12            | 1 | 137.2  | 242.6 | 279.6  | 197.2  | 247.9  | 202.9  | 260.1  | 140.4  | 287.8   | 5.0  | 7.9  | 10.3 | 8.1  | 9.6  | 7.9  | 9.7  | 5.9  | 11.2  |
| Myo6              | 1 | 196.3  | 301.2 | 296.4  | 308.1  | 322.9  | 329.5  | 363.4  | 214.1  | 532.1   | 4.7  | 5.6  | 7.0  | 7.0  | 7.0  | 7.6  | 7.7  | 4.9  | 12.3  |
| 2310030<br>G06Rik | 1 | 153.8  | 104.8 | 82.1   | 155.0  | 164.7  | 207.4  | 228.2  | 148.9  | 1313.7  | 4.9  | 2.9  | 3.0  | 5.6  | 5.1  | 7.4  | 8.3  | 5.3  | 46.7  |
| Dhx32             | 1 | 236.6  | 370.3 | 842.1  | 1705.9 | 2134.4 | 1994.1 | 2280.2 | 2267.8 | 5853.5  | 1.4  | 2.0  | 4.6  | 9.1  | 12.0 | 10.9 | 12.4 | 12.4 | 32.1  |
| Ablim1            | 1 | 593.3  | 526.4 | 605.1  | 715.4  | 626.2  | 785.6  | 619.0  | 634.5  | 1092.9  | 4.8  | 4.6  | 5.5  | 6.4  | 5.6  | 7.0  | 5.2  | 5.8  | 9.7   |
| P4ha1             | 1 | 959.7  | 946.0 | 956.9  | 1368.1 | 1524.9 | 2026.9 | 1008.3 | 842.8  | 2174.8  | 4.2  | 4.1  | 4.6  | 6.3  | 7.2  | 9.1  | 4.7  | 3.9  | 9.7   |
| Fam134b           | 1 | 336.3  | 287.0 | 289.0  | 619.6  | 487.0  | 540.5  | 537.8  | 250.6  | 925.7   | 4.2  | 2.7  | 3.3  | 7.9  | 6.1  | 6.9  | 6.6  | 3.6  | 11.8  |
| Ndrg1             | 1 | 34.0   | 26.4  | 127.5  | 2492.4 | 3020.5 | 4242.1 | 5322.6 | 3650.8 | 10818.6 | -2.6 | -4.3 | 1.0  | 20.6 | 23.7 | 34.3 | 44.0 | 29.4 | 87.4  |
| Gstm1             | 1 | 251.0  | 455.3 | 665.7  | 1424.3 | 1698.7 | 1707.3 | 1884.1 | 2117.8 | 3579.5  | 1.3  | 2.3  | 3.3  | 7.2  | 7.9  | 8.5  | 9.1  | 10.5 | 17.7  |
| Col4a4            | 1 | 14.4   | 17.2  | 16.9   | 96.7   | 263.4  | 590.3  | 847.9  | 726.0  | 1925.8  | -1.2 | -1.2 | -1.0 | 5.8  | 12.7 | 30.3 | 42.7 | 38.0 | 100.6 |
| Dct               | 1 | 65.0   | 148.6 | 84.3   | 89.4   | 293.4  | 604.7  | 169.0  | 549.6  | 973.7   | 1.6  | 3.9  | 2.2  | 2.2  | 6.7  | 14.6 | 4.2  | 13.9 | 23.4  |
| Arsi              | 1 | 309.4  | 348.8 | 308.8  | 395.7  | 626.7  | 223.6  | 597.0  | 77.1   | 649.4   | 4.6  | 4.6  | 4.3  | 5.4  | 8.5  | 3.3  | 8.4  | 1.1  | 9.5   |
| Lgals3            | 1 | 19.1   | 42.8  | 31.9   | 424.2  | 302.3  | 445.7  | 450.3  | 767.5  | 4834.2  | -1.3 | 1.2  | 1.4  | 13.9 | 9.6  | 13.9 | 14.1 | 23.1 | 151.2 |
| Fam169a           | 1 | 335.9  | 428.6 | 498.7  | 394.5  | 383.0  | 502.3  | 384.8  | 302.2  | 565.2   | 4.0  | 4.6  | 5.9  | 5.0  | 4.9  | 6.1  | 4.7  | 3.7  | 6.9   |
| Birc7             | 1 | 45.8   | 38.1  | 50.3   | 477.1  | 675.2  | 826.3  | 963.4  | 762.4  | 2642.3  | 1.1  | 1.1  | 1.3  | 11.8 | 18.2 | 20.6 | 24.1 | 19.6 | 66.5  |
| Oca2              | 1 | 21.4   | 52.7  | 53.8   | 80.6   | 125.0  | 218.9  | 142.8  | 110.6  | 287.2   | 1.2  | 2.7  | 3.0  | 4.4  | 6.4  | 12.3 | 8.0  | 6.6  | 16.0  |
| Rilp11            | 1 | 311.6  | 448.2 | 984.1  | 1222.3 | 1424.6 | 1295.9 | 1525.8 | 869.5  | 1928.6  | 1.7  | 2.4  | 5.8  | 7.2  | 8.2  | 7.4  | 8.6  | 5.0  | 11.1  |
| Tpd52             | 1 | 1262.8 | 896.3 | 1007.2 | 1308.0 | 1555.4 | 1325.8 | 1652.7 | 1685.3 | 2318.0  | 4.7  | 3.0  | 3.6  | 4.7  | 5.7  | 4.8  | 6.0  | 6.1  | 8.4   |
| Emb               | 1 | 1033.8 | 706.5 | 452.1  | 641.8  | 898.7  | 700.5  | 1327.4 | 1151.0 | 2122.1  | 5.9  | 4.1  | 2.6  | 3.5  | 4.9  | 3.9  | 7.6  | 6.1  | 11.9  |
| Ephx2             | 1 | 131.7  | 72.2  | 74.5   | 181.3  | 184.9  | 201.8  | 217.1  | 123.6  | 409.9   | 3.8  | 2.1  | 2.4  | 5.7  | 5.9  | 6.6  | 7.0  | 4.1  | 13.3  |
| Ptgsd             | 1 | 149.5  | 263.0 | 345.7  | 505.9  | 987.5  | 3117.0 | 1165.7 | 3226.7 | 9600.2  | -1.2 | 1.6  | 2.2  | 3.0  | 5.9  | 19.3 | 7.8  | 20.4 | 59.9  |
| Prrt4             | 1 | 155.6  | 189.2 | 152.6  | 239.4  | 199.9  | 110.2  | 251.3  | 159.3  | 489.5   | 3.6  | 4.3  | 3.6  | 5.3  | 4.5  | 2.4  | 5.5  | 3.5  | 11.0  |
| Dnajb2            | 1 | 187.3  | 215.1 | 401.1  | 1386.0 | 1732.9 | 1182.3 | 2162.7 | 1332.5 | 2920.9  | 1.3  | 1.5  | 2.4  | 9.0  | 11.4 | 7.8  | 14.3 | 9.2  | 19.2  |



|                   |   |        |        |        |        |        |        |        |        |        |      |      |      |      |      |      |      |      |      |
|-------------------|---|--------|--------|--------|--------|--------|--------|--------|--------|--------|------|------|------|------|------|------|------|------|------|
| Slc15a2           | 1 | 69.0   | 53.3   | 72.7   | 294.5  | 135.3  | 342.2  | 295.3  | 452.8  | 668.8  | 1.6  | 1.3  | 1.7  | 7.6  | 3.9  | 9.1  | 8.4  | 12.0 | 17.8 |
| Hebp2             | 1 | 165.9  | 207.6  | 275.2  | 1132.3 | 2357.6 | 1367.8 | 2748.3 | 939.2  | 3020.3 | 1.2  | 1.3  | 1.9  | 8.2  | 17.1 | 9.8  | 19.6 | 7.3  | 21.8 |
| Gpre5b            | 1 | 163.4  | 264.5  | 851.0  | 1278.1 | 1077.4 | 1304.8 | 1250.1 | 962.6  | 3031.9 | 1.1  | 1.5  | 4.9  | 8.0  | 6.7  | 8.0  | 7.8  | 5.8  | 18.7 |
| Sqrdl             | 1 | 56.1   | 95.1   | 219.2  | 442.1  | 560.2  | 400.1  | 585.0  | 309.5  | 809.1  | 1.1  | 1.9  | 4.1  | 8.4  | 11.0 | 7.5  | 11.1 | 5.8  | 15.3 |
| Suco              | 1 | 2337.1 | 2380.3 | 2500.9 | 2424.3 | 2443.6 | 2984.5 | 2739.5 | 1605.9 | 3057.6 | 4.4  | 4.6  | 4.3  | 4.3  | 4.4  | 5.4  | 4.9  | 2.8  | 5.5  |
| Mypn              | 1 | 18.6   | 29.8   | 85.8   | 307.3  | 203.0  | 296.9  | 363.5  | 508.5  | 1078.8 | -1.4 | -1.1 | 2.7  | 9.8  | 6.5  | 9.4  | 12.4 | 15.3 | 34.8 |
| Snta1             | 1 | 74.1   | 79.4   | 161.9  | 538.9  | 637.9  | 583.0  | 832.4  | 720.8  | 1265.1 | 1.1  | 1.3  | 2.6  | 8.8  | 10.0 | 9.2  | 13.1 | 10.5 | 20.1 |
| S100a6            | 1 | 25.7   | 48.5   | 86.7   | 475.1  | 795.2  | 1483.8 | 1155.9 | 1475.5 | 3033.1 | -2.2 | -1.2 | 1.3  | 6.8  | 11.0 | 21.0 | 16.0 | 20.8 | 42.6 |
| Nol3              | 1 | 45.7   | 67.6   | 154.7  | 374.7  | 492.9  | 400.0  | 497.2  | 346.0  | 2647.4 | -1.1 | 1.2  | 3.2  | 7.3  | 10.4 | 7.8  | 9.7  | 7.0  | 51.5 |
| Sned1             | 1 | 148.2  | 384.0  | 509.6  | 193.2  | 243.3  | 508.9  | 234.9  | 402.3  | 399.6  | 2.0  | 5.3  | 6.9  | 2.7  | 3.4  | 7.2  | 3.2  | 5.5  | 5.6  |
| Snhg12            | 1 | 327.4  | 293.3  | 375.1  | 2380.3 | 1537.3 | 1905.5 | 1553.8 | 2821.0 | 4437.6 | 1.8  | 1.4  | 1.6  | 5.4  | 7.8  | 9.4  | 7.6  | 13.5 | 21.9 |
| C920006<br>O11Rik | 1 | 22.7   | 28.7   | 28.6   | 168.9  | 142.5  | 298.7  | 195.2  | 32.0   | 747.7  | -1.0 | 1.6  | 1.4  | 9.8  | 8.8  | 17.3 | 12.6 | 1.8  | 43.3 |
| D630024<br>D03Rik | 1 | 26.7   | 32.5   | 45.3   | 242.7  | 280.1  | 266.7  | 271.0  | 118.8  | 400.2  | 1.1  | 1.3  | 1.8  | 8.3  | 10.5 | 10.1 | 10.1 | 4.8  | 15.1 |
| Pgap2             | 1 | 164.3  | 199.2  | 198.9  | 1712.3 | 1786.7 | 1783.7 | 2115.3 | 1535.0 | 3680.0 | 1.2  | 1.1  | 1.1  | 10.4 | 11.1 | 10.7 | 12.8 | 8.7  | 22.2 |
| Gpsm3             | 1 | 107.3  | 159.2  | 156.7  | 196.6  | 92.0   | 102.1  | 116.0  | 136.4  | 226.1  | 2.6  | 3.9  | 4.4  | 5.3  | 2.5  | 2.8  | 3.1  | 3.9  | 6.2  |
| Jazf1             | 1 | 35.2   | 48.0   | 139.6  | 167.2  | 220.2  | 153.0  | 217.1  | 137.2  | 435.0  | 1.2  | 1.4  | 4.5  | 5.3  | 6.6  | 4.7  | 6.9  | 4.5  | 13.4 |
| Tyrp1             | 1 | 30.5   | 40.6   | 31.5   | 53.1   | 201.1  | 372.9  | 191.3  | 300.1  | 336.9  | 1.1  | 1.5  | 1.2  | 1.9  | 7.7  | 13.9 | 7.0  | 12.0 | 12.5 |
| Ing2              | 1 | 368.6  | 378.7  | 634.5  | 1286.5 | 1434.3 | 1461.3 | 1943.7 | 1734.4 | 3665.7 | 1.4  | 1.4  | 2.6  | 4.6  | 5.3  | 5.4  | 7.2  | 6.4  | 13.6 |
| Amph              | 1 | 119.7  | 232.7  | 461.3  | 1236.7 | 1106.9 | 1684.0 | 1138.2 | 816.5  | 3282.9 | -1.2 | 1.1  | 2.6  | 8.1  | 7.1  | 10.8 | 7.3  | 5.2  | 21.1 |
| Fgfl2             | 1 | 122.7  | 167.9  | 363.9  | 243.2  | 134.9  | 159.7  | 135.8  | 154.5  | 934.3  | 2.3  | 3.3  | 7.0  | 7.4  | 2.7  | 3.0  | 2.7  | 2.9  | 18.0 |
| Slc4a5            | 1 | 28.8   | 37.4   | 30.9   | 32.2   | 54.7   | 190.9  | 52.3   | 144.2  | 177.8  | 1.7  | 2.3  | 1.9  | 2.0  | 3.3  | 11.6 | 3.0  | 9.8  | 10.8 |
| Htra1             | 1 | 48.0   | 34.8   | 36.5   | 206.5  | 829.5  | 1347.5 | 1252.6 | 1785.3 | 5176.5 | -1.7 | -2.6 | -2.6 | 2.3  | 8.5  | 14.7 | 13.4 | 19.1 | 56.4 |
| Thrsp             | 1 | 12.4   | 12.1   | 26.0   | 85.1   | 66.3   | 107.6  | 104.5  | 71.2   | 281.6  | -1.0 | -1.1 | 1.9  | 6.0  | 5.2  | 7.9  | 7.5  | 5.4  | 20.7 |
| Eif5b             | 1 | 585.3  | 630.4  | 736.9  | 3656.3 | 3739.8 | 2498.7 | 4240.4 | 4677.7 | 9517.5 | 1.3  | 1.4  | 1.5  | 7.7  | 7.8  | 5.2  | 8.9  | 9.7  | 20.0 |
| Pcbd2             | 1 | 325.1  | 389.4  | 428.5  | 1056.6 | 1028.8 | 1121.8 | 1102.3 | 711.5  | 3038.0 | 1.5  | 1.8  | 2.1  | 5.2  | 4.7  | 5.3  | 5.1  | 3.2  | 14.3 |
| Col4a3            | 1 | 27.4   | 24.2   | 26.4   | 59.8   | 76.1   | 175.1  | 245.3  | 229.5  | 934.8  | 1.2  | -1.2 | 1.0  | 2.3  | 2.8  | 6.9  | 9.7  | 9.4  | 37.1 |

|                   |   |       |       |        |        |        |       |        |        |        |      |      |      |     |      |      |      |      |      |
|-------------------|---|-------|-------|--------|--------|--------|-------|--------|--------|--------|------|------|------|-----|------|------|------|------|------|
| Ppl               | 1 | 44.9  | 44.7  | 51.0   | 75.3   | 120.1  | 207.1 | 409.8  | 245.1  | 446.9  | 1.3  | 1.4  | 1.4  | 2.4 | 4.0  | 6.4  | 11.9 | 7.2  | 14.4 |
| Tfap2a-as1        | 1 | 128.7 | 85.1  | 64.5   | 56.8   | 58.7   | 48.9  | 61.8   | 35.1   | 180.9  | 5.0  | 3.6  | 2.7  | 2.4 | 2.6  | 2.1  | 2.6  | 1.5  | 7.7  |
| Dync1i1           | 1 | 57.1  | 68.2  | 85.0   | 801.7  | 825.0  | 675.4 | 1071.0 | 670.2  | 2063.2 | -1.6 | -1.3 | -1.0 | 8.5 | 8.8  | 7.3  | 11.4 | 7.1  | 22.3 |
| Pla2g5            | 1 | 17.9  | 21.0  | 22.7   | 34.3   | 109.7  | 275.3 | 138.8  | 429.1  | 1414.5 | -1.2 | -1.1 | -1.0 | 1.5 | 4.3  | 12.2 | 5.7  | 17.6 | 62.6 |
| Pstpip2           | 1 | 35.8  | 40.5  | 51.6   | 218.9  | 187.7  | 213.4 | 325.8  | 216.6  | 622.2  | 1.1  | 1.1  | 1.4  | 6.3 | 5.5  | 6.2  | 9.1  | 5.8  | 18.1 |
| Kcnh1             | 1 | 31.0  | 37.3  | 47.8   | 209.6  | 151.4  | 166.0 | 189.7  | 153.1  | 455.1  | -1.0 | 1.0  | 1.3  | 6.0 | 4.3  | 5.0  | 5.5  | 4.8  | 13.7 |
| Hmx1              | 1 | 128.5 | 122.9 | 159.6  | 1588.1 | 2242.9 | 403.3 | 4212.4 | 5799.6 | 5632.8 | -1.2 | -1.4 | -1.1 | 9.8 | 13.6 | 2.4  | 25.0 | 33.2 | 33.1 |
| Slc22a2           | 1 | 15.6  | 24.5  | 33.2   | 95.4   | 91.7   | 69.3  | 140.8  | 107.9  | 292.2  | -1.1 | 1.2  | 1.6  | 5.2 | 5.2  | 3.7  | 7.6  | 5.1  | 15.5 |
| Entpd1            | 1 | 15.6  | 23.3  | 42.2   | 124.5  | 175.9  | 119.3 | 209.4  | 199.6  | 676.0  | -1.4 | 1.0  | 1.7  | 5.5 | 7.8  | 5.0  | 9.0  | 8.4  | 28.3 |
| Car8              | 1 | 17.6  | 14.5  | 15.4   | 145.2  | 81.7   | 107.2 | 138.0  | 40.4   | 424.2  | -1.1 | -1.1 | -1.1 | 7.2 | 4.3  | 6.3  | 8.0  | 3.0  | 24.4 |
| Ank               | 1 | 275.2 | 975.1 | 1453.6 | 886.1  | 829.6  | 608.3 | 896.8  | 672.1  | 1830.0 | 1.2  | 3.3  | 5.1  | 3.2 | 3.0  | 2.2  | 3.3  | 2.6  | 6.7  |
| Serp1nb6b         | 1 | 129.8 | 117.6 | 90.9   | 136.3  | 55.6   | 53.5  | 60.3   | 40.9   | 1261.3 | 3.7  | 3.0  | 2.4  | 3.6 | 1.6  | 1.4  | 1.6  | 1.2  | 33.8 |
| A430108<br>G06Rik | 1 | 10.6  | 11.8  | 15.9   | 44.2   | 34.8   | 58.6  | 69.1   | 36.6   | 345.3  | 1.0  | 1.2  | 1.7  | 4.7 | 3.6  | 5.7  | 6.4  | 3.5  | 34.6 |
| Fas               | 1 | 69.2  | 57.7  | 61.4   | 69.7   | 71.1   | 54.6  | 84.6   | 98.0   | 894.1  | 2.3  | 2.0  | 2.1  | 2.3 | 2.5  | 1.9  | 2.9  | 3.4  | 30.6 |
| Pacs1n3           | 1 | 209.0 | 170.1 | 244.2  | 492.5  | 780.0  | 461.7 | 1295.9 | 725.2  | 3645.1 | 1.3  | 1.2  | 1.4  | 2.9 | 4.8  | 2.9  | 8.3  | 4.4  | 22.9 |
| Il18              | 1 | 29.0  | 68.8  | 155.9  | 361.0  | 351.3  | 506.6 | 428.3  | 296.8  | 1473.8 | -2.5 | -1.3 | 1.7  | 4.3 | 4.5  | 6.4  | 5.6  | 3.8  | 18.6 |
| Paqr3             | 1 | 27.9  | 42.5  | 87.9   | 221.6  | 120.4  | 181.8 | 159.4  | 70.0   | 440.8  | -1.0 | -1.0 | 2.4  | 6.4 | 4.1  | 5.8  | 5.2  | 2.1  | 14.1 |
| Ephx1             | 1 | 27.0  | 48.8  | 46.4   | 125.0  | 112.1  | 126.3 | 141.4  | 136.5  | 1082.4 | -1.3 | 1.2  | 1.4  | 3.3 | 3.0  | 3.4  | 3.7  | 3.5  | 28.9 |
| Pygl              | 1 | 121.0 | 132.4 | 158.5  | 422.2  | 416.6  | 426.8 | 475.3  | 203.3  | 2286.7 | 1.1  | 1.0  | 1.4  | 3.6 | 3.9  | 3.6  | 4.2  | 1.7  | 19.3 |
| Secl              | 1 | 26.7  | 27.1  | 29.1   | 69.7   | 73.4   | 117.5 | 103.0  | 72.9   | 1071.9 | -1.1 | 1.0  | 1.1  | 2.6 | 2.6  | 4.2  | 3.9  | 2.6  | 38.7 |
| Cd44              | 1 | 15.4  | 15.8  | 19.3   | 296.3  | 271.1  | 456.9 | 638.8  | 116.9  | 3607.5 | -4.8 | -4.2 | -3.8 | 4.5 | 3.8  | 6.3  | 9.0  | 1.7  | 49.9 |
| Casq1             | 1 | 17.2  | 30.1  | 31.6   | 57.9   | 134.2  | 240.7 | 294.1  | 399.2  | 1432.4 | -2.4 | -1.4 | -1.3 | 1.3 | 3.2  | 5.6  | 6.8  | 8.8  | 33.6 |
| Optc              | 1 | 26.3  | 20.0  | 22.2   | 40.4   | 161.5  | 303.3 | 244.2  | 779.3  | 445.6  | 1.0  | -1.2 | -1.2 | 2.0 | 5.7  | 10.3 | 6.6  | 26.0 | 15.1 |
| Cubn              | 1 | 19.5  | 23.2  | 32.1   | 34.8   | 25.9   | 23.1  | 26.8   | 22.9   | 324.7  | 1.2  | 1.4  | 2.0  | 2.0 | 1.7  | 1.4  | 1.7  | 1.5  | 20.5 |
| 2310043<br>M15Rik | 1 | 22.5  | 33.5  | 29.3   | 84.9   | 76.3   | 80.4  | 96.9   | 111.5  | 406.7  | -1.4 | 1.1  | 1.0  | 2.7 | 2.4  | 2.8  | 3.3  | 3.5  | 13.8 |
| Neat1             | 1 | 58.7  | 47.8  | 46.5   | 61.4   | 56.9   | 97.9  | 55.0   | 73.1   | 546.2  | 1.5  | 1.4  | 1.4  | 1.8 | 1.8  | 2.9  | 1.6  | 2.2  | 16.2 |

|                   |   |       |       |       |        |        |        |        |        |         |      |      |      |      |     |      |      |      |       |
|-------------------|---|-------|-------|-------|--------|--------|--------|--------|--------|---------|------|------|------|------|-----|------|------|------|-------|
| Ctic5             | 1 | 17.9  | 14.6  | 13.3  | 38.7   | 40.5   | 60.1   | 153.1  | 113.9  | 1282.0  | -1.2 | -1.4 | -1.6 | 2.0  | 2.1 | 2.7  | 7.9  | 5.7  | 63.1  |
| Ankrd24           | 1 | 133.4 | 137.8 | 149.3 | 205.7  | 211.7  | 151.8  | 159.5  | 141.6  | 3949.1  | 1.5  | 1.3  | 1.7  | 2.2  | 2.2 | 1.6  | 1.8  | 1.5  | 42.8  |
| Lrrc66            | 1 | 23.3  | 18.9  | 20.3  | 20.0   | 21.4   | 19.2   | 22.8   | 20.9   | 172.9   | 1.8  | 1.6  | 1.6  | 1.5  | 1.7 | 1.5  | 1.7  | 1.7  | 13.7  |
| Hspb1             | 1 | 124.1 | 112.4 | 119.8 | 1600.6 | 2295.6 | 1289.6 | 2970.7 | 5058.0 | 22002.9 | -4.5 | -5.3 | -5.2 | 2.5  | 3.6 | 2.0  | 4.7  | 8.3  | 34.7  |
| Rrh               | 1 | 89.9  | 17.3  | 21.1  | 27.9   | 31.0   | 65.3   | 22.8   | 203.8  | 91.4    | 4.5  | -1.1 | 1.2  | 1.4  | 1.6 | 3.7  | 1.4  | 9.7  | 5.2   |
| Tcp11             | 1 | 197.0 | 195.5 | 172.9 | 313.7  | 464.8  | 293.8  | 655.2  | 751.1  | 6910.5  | 1.1  | 1.1  | 1.1  | 1.8  | 2.6 | 1.6  | 3.8  | 4.3  | 39.7  |
| Nrl               | 1 | 21.9  | 25.9  | 25.7  | 26.1   | 26.7   | 24.3   | 39.4   | 316.7  | 169.0   | 1.1  | 1.2  | 1.3  | 1.2  | 1.3 | 1.2  | 1.9  | 14.3 | 8.3   |
| Vsn11             | 1 | 13.2  | 12.2  | 10.1  | 66.4   | 45.9   | 61.1   | 59.8   | 47.2   | 407.3   | -1.6 | -1.7 | -2.2 | 3.1  | 2.2 | 2.9  | 2.8  | 2.5  | 19.3  |
| Cadm2             | 1 | 10.1  | 13.5  | 13.3  | 19.6   | 39.8   | 108.8  | 41.4   | 119.8  | 305.1   | -1.9 | -1.4 | -1.4 | 1.0  | 2.1 | 5.6  | 2.1  | 6.1  | 15.5  |
| Atp1a2            | 1 | 9.9   | 10.0  | 10.7  | 71.6   | 80.8   | 255.5  | 120.4  | 160.6  | 2246.3  | -4.8 | -5.0 | -4.8 | 1.5  | 1.8 | 5.3  | 2.5  | 4.0  | 47.5  |
| Gnat1             | 1 | 15.8  | 19.0  | 15.5  | 25.1   | 15.6   | 16.1   | 15.7   | 17.5   | 302.0   | 1.2  | 1.4  | 1.3  | 1.8  | 1.2 | 1.2  | 1.2  | 1.3  | 21.8  |
| Ackr4             | 1 | 11.2  | 12.4  | 11.0  | 12.0   | 46.1   | 30.0   | 62.7   | 22.9   | 331.2   | -1.2 | 1.0  | -1.2 | 1.0  | 3.9 | 2.3  | 4.8  | 1.7  | 25.7  |
| Fxyd1             | 1 | 87.0  | 151.6 | 284.3 | 355.1  | 379.5  | 660.1  | 493.1  | 1123.2 | 2904.2  | -2.6 | -1.6 | 1.5  | 1.8  | 1.9 | 3.3  | 2.5  | 5.3  | 14.3  |
| Abi3bp            | 1 | 7.3   | 9.1   | 12.2  | 36.3   | 33.3   | 118.0  | 103.9  | 29.4   | 468.5   | -2.7 | -2.4 | -1.9 | 1.7  | 1.7 | 5.6  | 5.0  | 1.5  | 22.7  |
| Pde               | 1 | 25.6  | 26.0  | 24.5  | 27.3   | 36.4   | 29.1   | 42.3   | 529.5  | 492.7   | -1.1 | -1.1 | -1.1 | -1.1 | 1.3 | 1.0  | 1.8  | 17.0 | 16.9  |
| Aqp5              | 1 | 31.2  | 32.2  | 38.4  | 69.9   | 77.3   | 55.8   | 105.6  | 125.0  | 2875.1  | -1.3 | -1.2 | -1.0 | 1.5  | 1.8 | 1.3  | 2.5  | 2.8  | 68.0  |
| Srd5a2            | 1 | 23.3  | 25.8  | 24.0  | 32.0   | 26.7   | 24.9   | 57.6   | 114.9  | 1176.9  | -1.0 | 1.2  | -1.0 | 1.3  | 1.1 | -1.0 | 2.3  | 4.2  | 46.6  |
| Sh3bgr            | 1 | 11.0  | 14.5  | 15.0  | 127.0  | 240.0  | 234.5  | 354.3  | 312.0  | 987.6   | -6.7 | -4.7 | -5.2 | 1.6  | 3.3 | 3.2  | 4.9  | 4.0  | 13.5  |
| Aldh3a1           | 1 | 8.0   | 8.7   | 8.9   | 8.6    | 7.5    | 6.6    | 7.1    | 8.2    | 2552.5  | 1.1  | 1.2  | 1.2  | 1.1  | 1.0 | -1.1 | -1.0 | 1.1  | 347.8 |
| Wdfy4             | 1 | 32.9  | 43.8  | 56.1  | 82.9   | 71.6   | 61.9   | 85.1   | 82.3   | 518.8   | -1.0 | 1.2  | 1.5  | 2.1  | 1.8 | 1.6  | 2.1  | 2.3  | 13.6  |
| Sord              | 1 | 62.1  | 105.1 | 92.5  | 380.4  | 423.8  | 418.4  | 465.3  | 273.2  | 3171.9  | -2.3 | -1.5 | -1.9 | 2.5  | 2.8 | 2.6  | 2.9  | 1.7  | 19.7  |
| Chrd11            | 1 | 26.6  | 33.6  | 37.1  | 73.6   | 74.7   | 109.9  | 84.4   | 58.0   | 723.2   | -1.4 | -1.5 | -1.2 | 1.8  | 1.7 | 2.5  | 2.1  | 1.5  | 17.2  |
| 1700020<br>N01Rik | 1 | 13.7  | 13.4  | 13.9  | 31.0   | 40.3   | 15.6   | 53.9   | 12.1   | 848.7   | 1.1  | 1.0  | 1.0  | 2.2  | 3.2 | 1.2  | 3.9  | -1.1 | 65.3  |
| Tinag             | 1 | 19.1  | 18.6  | 21.2  | 20.0   | 18.3   | 22.6   | 22.5   | 26.5   | 341.7   | 1.2  | 1.1  | 1.2  | 1.4  | 1.2 | 1.4  | 1.5  | 1.7  | 21.5  |
| Sbson             | 1 | 22.5  | 17.2  | 23.3  | 30.5   | 30.8   | 72.2   | 41.5   | 33.3   | 413.4   | -1.2 | -1.5 | -1.2 | 1.2  | 1.2 | 2.8  | 1.6  | 1.5  | 15.9  |
| Slc24a2           | 1 | 29.3  | 32.1  | 40.0  | 60.1   | 53.2   | 45.1   | 68.7   | 38.4   | 562.2   | -1.2 | -1.0 | 1.1  | 1.6  | 1.5 | 1.3  | 1.9  | 1.1  | 16.2  |

|                   |   |       |        |        |        |        |        |        |        |        |      |      |      |      |       |       |       |      |      |
|-------------------|---|-------|--------|--------|--------|--------|--------|--------|--------|--------|------|------|------|------|-------|-------|-------|------|------|
| Chpt1             | 1 | 70.3  | 112.6  | 128.9  | 253.6  | 224.7  | 213.9  | 316.7  | 252.7  | 1913.3 | -1.8 | -1.3 | -1.1 | 2.1  | 1.8   | 1.7   | 2.6   | 2.0  | 15.6 |
| Cdkn2b            | 1 | 50.7  | 197.2  | 374.1  | 49.9   | 56.7   | 53.2   | 60.1   | 58.2   | 445.9  | -1.2 | 3.1  | 5.7  | -1.2 | 1.0   | -1.1  | 1.0   | 1.0  | 7.5  |
| Ces5a             | 1 | 180.3 | 249.7  | 275.0  | 318.5  | 258.0  | 269.8  | 290.5  | 211.9  | 5534.9 | -1.1 | 1.2  | 1.2  | 1.6  | 1.2   | 1.3   | 1.4   | 1.0  | 26.8 |
| Otud1             | 1 | 29.7  | 29.0   | 21.8   | 45.9   | 33.8   | 50.0   | 57.2   | 37.2   | 523.5  | -1.1 | -1.1 | -1.2 | 1.5  | 1.1   | 1.7   | 2.0   | 1.3  | 17.6 |
| Cldn2             | 1 | 28.3  | 30.7   | 29.1   | 31.2   | 30.8   | 46.8   | 43.0   | 33.5   | 570.1  | 1.1  | 1.1  | 1.1  | 1.1  | 1.2   | 1.7   | 1.6   | 1.3  | 21.1 |
| Rgs4              | 1 | 10.1  | 10.6   | 10.9   | 68.4   | 216.3  | 116.6  | 152.8  | 192.1  | 2570.9 | -9.4 | -9.3 | -9.8 | -1.5 | 2.1   | 1.1   | 1.6   | 1.8  | 24.7 |
| Slc26a4           | 1 | 27.9  | 31.3   | 38.6   | 33.7   | 31.6   | 32.4   | 34.2   | 41.7   | 629.3  | -1.1 | 1.0  | 1.2  | 1.1  | 0.0   | -1.0  | 1.1   | 1.4  | 19.3 |
| Gm4850            | 1 | 23.7  | 25.6   | 23.4   | 25.5   | 20.6   | 21.6   | 27.8   | 26.6   | 595.1  | 1.0  | 1.1  | 1.0  | 1.1  | -1.1  | -1.1  | 1.1   | 1.2  | 24.5 |
| Ii33              | 1 | 8.0   | 8.0    | 9.2    | 10.6   | 10.0   | 22.3   | 14.7   | 23.0   | 387.1  | -1.7 | -1.8 | -1.5 | -1.4 | -1.4  | 1.6   | 1.1   | 2.1  | 27.6 |
| Abca8a            | 1 | 10.1  | 10.2   | 10.6   | 7.7    | 10.7   | 9.6    | 10.9   | 10.3   | 168.4  | -1.1 | -1.1 | -1.1 | -1.4 | -1.0  | -1.2  | 1.0   | -1.0 | 15.1 |
| Zfp354b           | 1 | 14.9  | 21.8   | 20.5   | 26.6   | 21.9   | 27.8   | 18.7   | 21.3   | 291.2  | -1.4 | -1.1 | -1.2 | 1.4  | 1.0   | 1.3   | -1.1  | -1.0 | 14.2 |
| Gp2               | 1 | 13.0  | 14.3   | 14.6   | 12.9   | 14.3   | 12.2   | 17.6   | 12.1   | 183.2  | -1.1 | 1.1  | 1.1  | -1.0 | 1.0   | -1.1  | 1.2   | -1.2 | 13.4 |
| Mup4              | 1 | 8.2   | 7.9    | 8.2    | 7.2    | 7.4    | 7.3    | 7.8    | 11.1   | 137.9  | -1.0 | -1.1 | -1.0 | -1.2 | -1.2  | -1.2  | -1.1  | 1.2  | 15.7 |
| Emp2              | 1 | 59.7  | 45.3   | 36.4   | 62.0   | 54.9   | 68.8   | 67.4   | 81.9   | 2221.4 | -2.0 | -2.6 | -3.2 | -2.0 | -2.2  | -1.7  | -1.8  | -1.5 | 18.5 |
| Prox1             | 2 | 528.6 | 1283.3 | 1261.9 | 929.3  | 940.8  | 2071.2 | 1222.2 | 606.6  | 891.3  | 18.3 | 37.1 | 37.8 | 29.3 | 28.9  | 62.3  | 36.6  | 18.3 | 27.1 |
| A830021<br>M18Rik | 2 | 19.3  | 96.4   | 192.4  | 275.8  | 1404.2 | 1389.9 | 1296.9 | 404.1  | 31.2   | 3.6  | 8.4  | 20.6 | 34.4 | 143.4 | 154.0 | 133.5 | 41.4 | 3.1  |
| 2900017F<br>05Rik | 2 | 127.8 | 46.7   | 79.4   | 15.7   | 574.4  | 302.1  | 696.3  | 36.6   | 31.2   | 10.5 | 6.3  | 7.4  | 1.5  | 56.1  | 27.6  | 63.8  | 3.6  | 2.8  |
| Rnf113a1          | 2 | 364.8 | 361.3  | 398.2  | 1076.1 | 2204.3 | 3395.1 | 2729.8 | 1494.2 | 121.0  | 4.6  | 4.4  | 5.4  | 14.3 | 28.4  | 43.4  | 35.3  | 17.8 | 1.5  |
| AU02176<br>0      | 2 | 126.3 | 102.8  | 84.3   | 28.4   | 404.5  | 395.0  | 542.9  | 22.5   | 31.0   | 11.2 | 10.4 | 8.5  | 2.3  | 34.9  | 32.4  | 44.7  | 1.7  | 2.5  |
| 2310014F<br>06Rik | 2 | 152.1 | 212.1  | 249.1  | 282.9  | 372.0  | 452.4  | 331.9  | 225.7  | 140.7  | 4.6  | 6.1  | 7.5  | 8.5  | 10.9  | 13.4  | 9.9   | 6.4  | 4.1  |
| Stx3              | 2 | 449.0 | 339.4  | 407.2  | 571.0  | 570.5  | 803.1  | 679.1  | 405.2  | 379.5  | 5.9  | 4.1  | 5.1  | 6.4  | 7.0   | 10.0  | 8.4   | 5.0  | 4.7  |
| D230019<br>N24Rik | 2 | 68.9  | 59.4   | 69.5   | 41.8   | 348.1  | 455.6  | 408.8  | 25.5   | 40.9   | 4.5  | 4.0  | 4.9  | 3.1  | 24.9  | 32.2  | 29.7  | 1.9  | 2.9  |
| D430033<br>H22Rik | 2 | 117.0 | 51.5   | 49.5   | 24.1   | 239.6  | 349.2  | 158.1  | 24.9   | 32.0   | 8.3  | 4.9  | 4.6  | 2.2  | 17.1  | 26.0  | 11.3  | 1.9  | 2.2  |
| 4930406<br>D14Rik | 2 | 84.2  | 116.3  | 98.9   | 55.6   | 174.6  | 206.6  | 175.4  | 62.7   | 69.1   | 4.0  | 5.8  | 5.1  | 3.1  | 8.8   | 9.9   | 8.6   | 2.8  | 3.3  |
| Lama1             | 2 | 563.1 | 590.2  | 381.8  | 335.8  | 622.0  | 655.1  | 607.7  | 395.2  | 158.5  | 7.3  | 7.1  | 5.1  | 4.3  | 7.5   | 7.7   | 6.8   | 4.6  | 1.9  |
| 92301081<br>15Rik | 2 | 192.0 | 130.3  | 304.8  | 68.9   | 417.4  | 369.2  | 423.3  | 126.2  | 125.9  | 4.3  | 3.9  | 6.7  | 2.0  | 8.8   | 8.4   | 9.6   | 2.8  | 2.9  |

|                   |   |       |       |       |       |       |       |       |       |       |      |     |     |      |      |      |      |      |      |
|-------------------|---|-------|-------|-------|-------|-------|-------|-------|-------|-------|------|-----|-----|------|------|------|------|------|------|
| 9930031P<br>18Rik | 2 | 157.8 | 46.6  | 47.3  | 26.3  | 235.9 | 250.5 | 164.5 | 32.8  | 27.5  | 8.5  | 4.0 | 3.7 | 1.8  | 13.9 | 14.9 | 9.4  | 2.0  | 1.6  |
| Tmem37            | 2 | 685.3 | 561.5 | 513.1 | 608.3 | 557.4 | 743.8 | 485.3 | 826.2 | 424.2 | 4.6  | 3.9 | 3.3 | 4.4  | 3.8  | 5.2  | 3.4  | 5.6  | 2.9  |
| D5Wsu15<br>2e     | 2 | 151.0 | 63.7  | 55.4  | 27.1  | 202.0 | 227.5 | 164.3 | 28.1  | 45.8  | 7.5  | 3.9 | 3.7 | 1.7  | 11.5 | 13.3 | 9.7  | 1.6  | 2.6  |
| 2900073C<br>17Rik | 2 | 340.0 | 189.5 | 157.1 | 59.4  | 329.5 | 292.5 | 283.4 | 73.8  | 47.4  | 11.4 | 7.2 | 5.4 | 1.6  | 10.3 | 8.8  | 8.4  | 2.1  | 1.4  |
| 6430537<br>K16Rik | 2 | 516.7 | 149.4 | 117.1 | 46.8  | 476.1 | 607.6 | 421.7 | 64.5  | 27.9  | 11.8 | 5.6 | 3.8 | 1.2  | 13.4 | 16.4 | 10.6 | 1.7  | -1.3 |
| 4930578<br>M01Rik | 2 | 111.9 | 62.9  | 57.9  | 45.0  | 98.0  | 84.3  | 89.0  | 87.0  | 27.1  | 6.2  | 4.2 | 3.6 | 2.5  | 5.6  | 5.0  | 5.4  | 4.8  | 1.6  |
| Dmd               | 2 | 346.8 | 293.1 | 310.8 | 307.6 | 308.4 | 319.8 | 380.7 | 290.0 | 337.2 | 4.5  | 4.0 | 4.1 | 4.0  | 4.2  | 4.2  | 5.0  | 4.0  | 4.5  |
| Kcnq1otl          | 2 | 199.6 | 135.5 | 119.3 | 42.9  | 353.4 | 409.1 | 277.6 | 137.9 | 54.9  | 5.0  | 4.3 | 4.1 | 1.3  | 9.3  | 10.7 | 7.1  | 3.4  | 1.4  |
| 5430406J<br>06Rik | 2 | 165.0 | 144.6 | 98.4  | 159.6 | 156.8 | 539.6 | 220.1 | 106.8 | 75.8  | 4.1  | 3.7 | 2.7 | 2.9  | 4.1  | 13.6 | 5.6  | 2.4  | 1.9  |
| A130004<br>G07Rik | 2 | 70.0  | 17.6  | 18.9  | 16.2  | 74.2  | 149.0 | 42.6  | 14.3  | 20.3  | 6.1  | 2.5 | 2.0 | 1.8  | 7.3  | 16.8 | 4.8  | 1.6  | 2.2  |
| D15Wsu1<br>26e    | 2 | 103.6 | 69.9  | 61.0  | 25.9  | 192.6 | 448.7 | 177.2 | 28.9  | 27.8  | 4.4  | 3.7 | 3.0 | 1.5  | 8.9  | 21.3 | 8.1  | 1.3  | 1.3  |
| 5730409<br>N24Rik | 2 | 26.1  | 25.7  | 27.6  | 24.7  | 195.4 | 385.8 | 207.8 | 37.5  | 16.6  | 2.2  | 2.0 | 2.4 | 1.9  | 16.1 | 31.2 | 17.1 | 2.6  | 1.4  |
| 9030425L<br>15Rik | 2 | 59.0  | 37.1  | 34.8  | 24.8  | 241.2 | 430.9 | 269.2 | 27.5  | 42.8  | 2.8  | 2.1 | 2.2 | 1.3  | 12.2 | 21.8 | 14.0 | 1.4  | 2.2  |
| 2900011L<br>18Rik | 2 | 66.1  | 34.8  | 37.3  | 18.3  | 162.4 | 373.7 | 124.3 | 16.5  | 18.1  | 4.5  | 2.7 | 2.5 | 1.2  | 11.3 | 26.8 | 8.9  | 1.2  | 1.2  |
| D530037<br>H12Rik | 2 | 40.8  | 20.3  | 45.2  | 14.9  | 111.3 | 154.0 | 98.3  | 18.4  | 12.2  | 4.1  | 2.2 | 4.5 | 1.4  | 10.6 | 15.0 | 9.9  | 1.6  | 1.2  |
| A430102J<br>17Rik | 2 | 172.4 | 79.4  | 91.7  | 23.8  | 224.0 | 370.7 | 197.7 | 48.5  | 33.3  | 6.1  | 3.9 | 3.2 | -1.2 | 8.5  | 14.1 | 7.4  | 1.7  | 1.3  |
| 2810043<br>O03Rik | 2 | 69.6  | 24.6  | 22.1  | 11.6  | 97.1  | 203.5 | 87.7  | 11.1  | 13.6  | 7.7  | 2.9 | 2.4 | 1.2  | 9.4  | 19.2 | 8.3  | -1.0 | 1.3  |
| 9430011C<br>21Rik | 2 | 93.6  | 45.9  | 36.9  | 23.3  | 331.9 | 290.7 | 325.6 | 18.7  | 32.3  | 5.2  | 2.3 | 2.0 | 1.2  | 17.4 | 15.4 | 16.3 | -1.1 | 1.7  |
| 9330156P<br>08Rik | 2 | 33.1  | 22.2  | 26.0  | 25.7  | 69.5  | 147.7 | 80.0  | 11.0  | 27.5  | 3.0  | 2.0 | 2.3 | 2.2  | 6.4  | 13.1 | 7.1  | 1.1  | 2.5  |
| D230044<br>B12Rik | 2 | 57.6  | 26.6  | 25.2  | 14.1  | 121.6 | 197.4 | 105.9 | 19.4  | 17.9  | 4.6  | 2.4 | 2.3 | 1.2  | 8.8  | 14.4 | 7.2  | 1.4  | 1.3  |
| B930068<br>K11Rik | 2 | 131.5 | 55.6  | 39.9  | 25.6  | 156.0 | 190.2 | 143.0 | 31.6  | 29.0  | 5.8  | 3.3 | 2.1 | 1.2  | 7.3  | 8.8  | 6.4  | 1.5  | 1.3  |
| 3110005L<br>21Rik | 2 | 45.9  | 17.5  | 16.1  | 14.0  | 122.9 | 132.3 | 98.9  | 13.4  | 14.9  | 4.4  | 1.8 | 1.9 | 1.5  | 12.7 | 13.8 | 10.0 | 1.4  | 1.5  |
| 8030447<br>M02Rik | 2 | 124.8 | 46.7  | 52.1  | 36.3  | 274.8 | 397.5 | 232.3 | 45.1  | 33.1  | 4.5  | 2.0 | 2.1 | 1.3  | 9.7  | 14.1 | 8.6  | 1.5  | 1.2  |
| Sfd2              | 2 | 127.3 | 105.7 | 194.5 | 105.1 | 98.4  | 563.4 | 91.6  | 53.4  | 61.9  | 2.9  | 2.5 | 4.2 | 3.2  | 5.4  | 13.4 | 3.4  | 1.3  | 1.5  |
| Taf15             | 2 | 81.5  | 66.8  | 48.3  | 46.8  | 63.3  | 104.1 | 43.6  | 17.4  | 13.4  | 6.8  | 4.2 | 3.0 | 2.6  | 4.1  | 7.0  | 3.0  | 1.0  | -1.1 |
| 5430434<br>G16Rik | 2 | 95.0  | 44.5  | 31.1  | 22.3  | 65.9  | 95.5  | 83.2  | 19.4  | 10.2  | 5.8  | 3.1 | 2.3 | 1.8  | 4.4  | 6.5  | 5.4  | 1.3  | -1.4 |

|                   |   |        |        |        |        |        |        |        |       |        |       |      |      |      |      |      |      |      |      |
|-------------------|---|--------|--------|--------|--------|--------|--------|--------|-------|--------|-------|------|------|------|------|------|------|------|------|
| B230214<br>009Rik | 2 | 13.6   | 9.9    | 16.3   | 51.5   | 473.2  | 361.9  | 304.9  | 8.2   | 55.1   | 1.2   | -1.1 | -1.0 | 5.2  | 34.4 | 26.0 | 19.0 | -1.5 | 3.9  |
| Gm19313           | 2 | 122.5  | 52.9   | 55.6   | 33.0   | 154.5  | 178.3  | 128.4  | 46.6  | 35.9   | 4.7   | 2.9  | 2.6  | 1.4  | 6.2  | 7.1  | 4.9  | 1.7  | 1.4  |
| D5Erd79<br>8e     | 2 | 65.8   | 31.7   | 22.7   | 11.4   | 66.2   | 106.0  | 56.3   | 22.2  | 14.7   | 6.2   | 2.7  | 1.9  | 1.0  | 5.5  | 9.0  | 5.0  | 1.8  | 1.2  |
| LOC1010<br>56057  | 2 | 650.7  | 411.9  | 281.7  | 144.9  | 376.8  | 823.7  | 592.0  | 201.7 | 88.1   | 5.8   | 3.6  | 3.1  | -1.0 | 3.5  | 7.3  | 4.7  | 1.8  | -1.3 |
| Mid1              | 2 | 163.4  | 69.1   | 69.9   | 29.7   | 82.4   | 166.5  | 73.5   | 47.7  | 72.6   | 5.9   | 2.4  | 2.8  | 1.0  | 2.8  | 5.8  | 2.5  | 1.6  | 2.5  |
| 4732423E<br>21Rik | 2 | 42.6   | 19.7   | 13.4   | 8.6    | 50.0   | 68.7   | 36.1   | 9.8   | 9.3    | 5.1   | 2.7  | 2.0  | 1.1  | 6.4  | 8.7  | 4.6  | 1.2  | 1.2  |
| Atoh7             | 2 | 33.2   | 48.9   | 85.6   | 362.5  | 534.3  | 686.1  | 61.4   | 559.0 | 22.7   | -1.1  | 1.6  | 3.0  | 8.6  | 12.0 | 19.9 | 2.3  | 14.1 | -1.5 |
| C130015<br>C19    | 2 | 112.2  | 67.3   | 39.6   | 25.2   | 120.1  | 217.8  | 95.7   | 26.3  | 17.3   | 5.1   | 3.4  | 2.2  | 1.2  | 5.7  | 10.7 | 4.7  | 1.3  | -1.2 |
| 2310035P<br>21Rik | 2 | 59.4   | 37.8   | 33.9   | 15.0   | 46.7   | 66.1   | 48.5   | 15.3  | 18.8   | 5.1   | 2.6  | 2.5  | 1.1  | 3.4  | 5.0  | 3.5  | 1.2  | 1.4  |
| D9Erd30<br>6e     | 2 | 133.0  | 55.2   | 46.7   | 16.6   | 103.1  | 74.8   | 88.6   | 35.9  | 18.1   | 5.7   | 2.8  | 2.3  | -1.4 | 5.0  | 3.6  | 4.1  | 1.7  | -1.2 |
| AA41503<br>8      | 2 | 102.5  | 49.1   | 40.7   | 20.8   | 79.9   | 223.6  | 54.6   | 27.1  | 20.9   | 4.8   | 2.7  | 1.8  | 1.0  | 4.0  | 10.9 | 2.7  | 1.4  | 1.0  |
| H3f3b             | 2 | 61.6   | 62.3   | 46.0   | 32.5   | 228.1  | 426.2  | 116.3  | 39.0  | 41.7   | 2.2   | 2.1  | 1.7  | 1.2  | 7.7  | 15.0 | 4.0  | 1.3  | 1.5  |
| C430003<br>N24Rik | 2 | 68.3   | 27.4   | 35.3   | 16.8   | 103.4  | 140.2  | 75.6   | 19.2  | 17.9   | 4.2   | 1.7  | 2.1  | 1.1  | 6.4  | 8.5  | 4.3  | 1.1  | 1.0  |
| A730059<br>M13Rik | 2 | 44.9   | 23.2   | 19.6   | 11.7   | 33.1   | 107.4  | 33.3   | 14.8  | 11.8   | 4.8   | 2.2  | 1.8  | 1.0  | 3.2  | 9.6  | 3.1  | 1.3  | 1.1  |
| Fu3krp            | 2 | 8.2    | 10.9   | 12.7   | 63.1   | 19.7   | 616.3  | 95.1   | 14.8  | 31.0   | -1.0  | 1.1  | 1.5  | 6.6  | 1.9  | 61.7 | 6.2  | 1.4  | 3.1  |
| LOC7577<br>1      | 2 | 86.8   | 62.5   | 34.5   | 26.4   | 55.9   | 71.9   | 85.5   | 20.0  | 27.0   | 4.3   | 2.8  | 1.7  | 1.3  | 2.8  | 3.6  | 3.8  | 1.1  | 1.3  |
| Slc16a4           | 2 | 141.8  | 59.8   | 34.6   | 22.0   | 79.1   | 175.8  | 72.0   | 39.1  | 17.5   | 5.8   | 2.7  | 1.5  | 0.0  | 3.5  | 7.4  | 2.9  | 1.5  | -1.4 |
| 6330415B<br>21Rik | 2 | 8.2    | 8.6    | 8.3    | 8.5    | 100.2  | 128.0  | 122.2  | 10.2  | 21.0   | 1.1   | 1.1  | 1.1  | 1.2  | 13.3 | 16.9 | 15.9 | 1.4  | 2.8  |
| 1110012L<br>19Rik | 2 | 237.5  | 192.6  | 206.3  | 300.3  | 1674.5 | 1679.4 | 2001.3 | 221.9 | 300.1  | 1.3   | 1.0  | 1.2  | 1.8  | 9.3  | 9.7  | 11.9 | 1.3  | 1.7  |
| D1Erd56<br>4e     | 2 | 14.1   | 12.0   | 9.1    | 7.9    | 52.1   | 109.5  | 89.1   | 9.5   | 11.2   | 1.8   | 1.4  | 1.1  | 1.0  | 6.3  | 12.7 | 10.3 | 1.2  | 1.3  |
| B4302031<br>24Rik | 2 | 18.9   | 14.8   | 16.4   | 12.4   | 91.9   | 162.2  | 119.5  | 15.1  | 13.9   | 1.5   | 1.1  | 1.3  | 1.1  | 7.4  | 13.0 | 8.6  | 1.2  | 1.1  |
| 4930447C<br>04Rik | 2 | 10.1   | 10.6   | 10.8   | 9.0    | 19.0   | 104.0  | 18.0   | 20.9  | 12.0   | 1.3   | 1.4  | 1.3  | 1.4  | 2.6  | 12.8 | 2.0  | 2.4  | 1.5  |
| 2610027<br>H17Rik | 2 | 16.3   | 11.1   | 9.1    | 11.2   | 25.1   | 105.1  | 16.3   | 12.6  | 13.4   | 1.9   | 1.3  | 1.2  | 1.4  | 2.8  | 12.5 | 1.9  | 1.4  | 1.6  |
| A330076<br>H08Rik | 2 | 9.5    | 10.7   | 11.4   | 9.6    | 24.7   | 125.9  | 28.9   | 10.8  | 9.4    | -1.1  | 1.0  | 1.1  | -1.1 | 2.4  | 12.3 | 2.7  | 1.0  | -1.1 |
| Xist              | 3 | 970.6  | 329.6  | 372.6  | 115.3  | 1037.2 | 1073.6 | 602.0  | 267.3 | 108.3  | 134.2 | 51.1 | 60.3 | 16.4 | 23.4 | 19.3 | 15.9 | 35.1 | 14.9 |
| Dmrta2            | 3 | 3203.7 | 1507.8 | 1463.6 | 1238.4 | 1458.9 | 1808.6 | 1865.4 | 638.6 | 2046.1 | 22.9  | 12.2 | 10.8 | 9.4  | 11.1 | 13.6 | 13.4 | 4.4  | 15.4 |

|         |   |        |        |        |        |        |        |        |        |        |      |      |      |      |      |      |      |      |      |
|---------|---|--------|--------|--------|--------|--------|--------|--------|--------|--------|------|------|------|------|------|------|------|------|------|
| Pax6    | 3 | 3609.2 | 3160.2 | 2399.9 | 981.4  | 1384.7 | 2352.4 | 1232.2 | 1998.0 | 1572.6 | 24.6 | 19.7 | 14.4 | 6.3  | 8.7  | 15.2 | 8.1  | 13.1 | 10.2 |
| Six3    | 3 | 2074.6 | 1517.9 | 1367.4 | 1426.0 | 1021.8 | 1620.8 | 979.9  | 572.3  | 676.7  | 20.3 | 15.3 | 13.3 | 14.1 | 10.1 | 16.1 | 9.8  | 5.8  | 6.7  |
| Six3os1 | 3 | 436.2  | 257.4  | 200.8  | 237.9  | 240.2  | 257.5  | 263.1  | 208.7  | 78.7   | 19.2 | 11.4 | 10.4 | 11.5 | 10.9 | 12.3 | 12.6 | 9.8  | 3.7  |
| Cdh1    | 3 | 2455.5 | 1496.9 | 1264.0 | 1107.2 | 926.5  | 860.3  | 809.3  | 435.1  | 817.8  | 16.9 | 11.1 | 9.0  | 8.2  | 5.6  | 6.3  | 5.9  | 3.4  | 6.0  |
| Cx3cl1  | 3 | 967.8  | 424.4  | 274.1  | 309.3  | 223.1  | 100.6  | 189.3  | 146.8  | 136.7  | 22.4 | 9.6  | 5.9  | 7.1  | 4.4  | 2.3  | 4.4  | 3.5  | 3.1  |
| Mab21l1 | 3 | 2213.5 | 1624.8 | 1439.3 | 537.4  | 723.7  | 915.0  | 601.9  | 905.0  | 743.7  | 9.8  | 7.6  | 6.7  | 2.5  | 3.5  | 4.2  | 2.7  | 4.3  | 3.4  |
| Edaradd | 3 | 328.5  | 292.2  | 194.0  | 194.0  | 115.9  | 233.5  | 83.9   | 84.5   | 111.2  | 7.3  | 5.7  | 5.2  | 4.9  | 2.8  | 5.6  | 1.9  | 2.0  | 2.6  |
| Ggt1    | 3 | 343.7  | 225.5  | 146.8  | 160.8  | 147.0  | 131.9  | 140.8  | 140.1  | 101.9  | 7.4  | 5.0  | 3.3  | 3.6  | 3.4  | 2.9  | 3.2  | 3.2  | 2.2  |
| Cadps2  | 3 | 508.4  | 182.1  | 168.3  | 186.7  | 159.5  | 166.7  | 196.7  | 203.7  | 468.3  | 7.5  | 2.6  | 2.6  | 2.7  | 2.4  | 2.5  | 2.9  | 2.9  | 7.1  |
| Leprel1 | 3 | 2027.8 | 1427.6 | 967.6  | 790.4  | 615.7  | 532.0  | 502.5  | 410.8  | 95.2   | 13.6 | 9.4  | 6.5  | 4.9  | 4.1  | 3.5  | 3.3  | 2.8  | -1.6 |
| Upp1    | 3 | 212.9  | 171.1  | 92.1   | 146.6  | 96.4   | 82.7   | 71.4   | 152.2  | 227.9  | 6.7  | 4.2  | 2.6  | 4.4  | 3.5  | 2.2  | 2.1  | 4.0  | 6.0  |
| Eml5    | 3 | 549.4  | 246.0  | 180.9  | 121.3  | 225.1  | 276.8  | 230.5  | 190.6  | 91.5   | 9.2  | 4.6  | 3.2  | 2.1  | 4.0  | 4.9  | 4.0  | 3.2  | 1.6  |
| Etv5    | 3 | 979.6  | 732.7  | 621.8  | 734.5  | 434.1  | 535.0  | 402.2  | 525.5  | 367.5  | 5.7  | 5.0  | 4.3  | 4.9  | 3.1  | 3.7  | 2.8  | 3.7  | 2.5  |
| Atp1b3  | 3 | 6115.9 | 6422.6 | 5205.3 | 2431.5 | 3029.2 | 3357.4 | 3274.7 | 3213.0 | 7190.8 | 4.4  | 4.4  | 3.7  | 1.7  | 2.1  | 2.4  | 2.3  | 2.4  | 5.1  |
| Elp4    | 3 | 1191.4 | 908.7  | 699.7  | 503.0  | 473.9  | 711.3  | 398.4  | 535.0  | 404.6  | 4.7  | 3.7  | 3.1  | 2.3  | 2.1  | 3.1  | 1.8  | 2.5  | 1.8  |
| Tfap2a  | 3 | 1149.0 | 524.8  | 409.8  | 328.7  | 244.2  | 310.1  | 374.7  | 361.3  | 665.8  | 6.5  | 3.0  | 2.3  | 2.0  | 1.4  | 1.7  | 2.0  | 2.0  | 3.7  |
| Abcc4   | 3 | 784.7  | 263.0  | 163.6  | 203.4  | 151.8  | 174.7  | 139.0  | 53.8   | 84.0   | 11.4 | 4.0  | 2.7  | 3.2  | 2.1  | 2.8  | 2.1  | -1.3 | 1.3  |
| Itga3   | 3 | 496.3  | 260.0  | 180.8  | 287.5  | 240.8  | 200.5  | 252.2  | 184.5  | 241.4  | 5.0  | 3.0  | 1.9  | 2.9  | 2.2  | 1.9  | 2.3  | 1.7  | 2.3  |
| Sema4d  | 3 | 556.9  | 558.3  | 383.2  | 275.6  | 265.1  | 176.6  | 187.2  | 293.8  | 164.2  | 5.2  | 5.0  | 3.6  | 2.4  | 2.3  | 1.6  | 1.7  | 2.7  | 1.5  |
| Aldh1a3 | 3 | 683.6  | 176.7  | 71.1   | 34.5   | 86.5   | 146.0  | 28.6   | 252.2  | 99.8   | 20.2 | 4.3  | 2.1  | 1.2  | 2.1  | 4.4  | -1.1 | 7.6  | 3.0  |
| Slc17a1 | 3 | 210.4  | 83.7   | 73.5   | 65.3   | 55.4   | 52.1   | 76.4   | 44.3   | 35.6   | 7.7  | 3.3  | 2.8  | 2.3  | 2.0  | 1.9  | 2.8  | 1.5  | 1.2  |
| Steap1  | 3 | 331.3  | 180.9  | 131.0  | 91.1   | 91.7   | 110.0  | 87.9   | 139.5  | 262.0  | 5.0  | 2.7  | 1.8  | 1.6  | 1.5  | 1.8  | 1.4  | 2.3  | 4.2  |
| Cyp26a1 | 3 | 449.7  | 355.6  | 250.4  | 158.0  | 115.5  | 104.5  | 146.8  | 166.1  | 351.6  | 5.1  | 4.3  | 3.1  | 1.6  | 1.4  | 1.2  | 1.7  | 1.9  | 4.1  |
| Dnaje1  | 3 | 1035.2 | 472.9  | 507.4  | 325.4  | 248.9  | 265.7  | 196.1  | 102.1  | 161.4  | 8.0  | 4.6  | 4.2  | 2.6  | 2.0  | 2.2  | 1.6  | -1.2 | 1.3  |
| Plekha1 | 3 | 890.9  | 478.2  | 370.2  | 250.0  | 442.2  | 672.5  | 389.1  | 472.3  | 268.1  | 4.4  | 2.5  | 1.8  | 1.3  | 2.1  | 3.3  | 1.9  | 2.3  | 1.3  |
| Coll3a1 | 3 | 1363.0 | 479.7  | 351.4  | 160.4  | 178.7  | 132.5  | 136.4  | 83.3   | 54.9   | 15.1 | 5.8  | 4.2  | 2.0  | 2.1  | 1.6  | 1.7  | 1.0  | -1.5 |

|                   |   |        |        |        |        |       |       |        |       |       |      |     |      |      |      |      |      |      |      |
|-------------------|---|--------|--------|--------|--------|-------|-------|--------|-------|-------|------|-----|------|------|------|------|------|------|------|
| 1700086L<br>19Rik | 3 | 85.5   | 45.3   | 24.1   | 83.9   | 42.0  | 27.7  | 35.2   | 18.4  | 23.2  | 5.8  | 2.9 | 1.4  | 5.8  | 2.5  | 1.7  | 2.2  | 1.1  | 1.4  |
| Plech1            | 3 | 657.2  | 348.2  | 281.1  | 182.6  | 205.4 | 294.4 | 170.2  | 193.1 | 92.9  | 4.9  | 2.7 | 2.1  | 1.5  | 1.5  | 2.3  | 1.3  | 1.7  | -1.4 |
| A730062<br>M13Rik | 3 | 93.3   | 53.7   | 41.7   | 25.8   | 45.8  | 67.3  | 44.5   | 27.2  | 32.7  | 4.4  | 2.5 | 1.8  | 1.1  | 2.0  | 2.9  | 1.9  | 1.2  | 1.4  |
| Cngb3             | 3 | 135.1  | 40.8   | 29.5   | 17.4   | 18.2  | 19.9  | 20.5   | 23.1  | 25.6  | 8.3  | 2.6 | 1.9  | 1.1  | 1.3  | 1.3  | 1.3  | 1.5  | 1.7  |
| Stra6             | 3 | 1638.8 | 989.8  | 522.0  | 336.2  | 204.0 | 118.0 | 168.0  | 156.7 | 66.4  | 12.0 | 8.6 | 3.5  | 2.4  | 1.4  | -1.2 | 1.2  | 1.2  | -2.1 |
| Pla2g4a           | 3 | 531.1  | 239.3  | 139.8  | 222.5  | 166.0 | 183.9 | 153.4  | 93.2  | 232.1 | 5.2  | 1.7 | 1.2  | 2.0  | 1.3  | 1.7  | 1.4  | -1.0 | 2.1  |
| Sle15a3           | 3 | 412.4  | 121.4  | 308.8  | 31.7   | 20.5  | 24.7  | 20.0   | 23.0  | 16.2  | 15.4 | 5.7 | 12.8 | 1.3  | -1.1 | 1.1  | -1.1 | -1.0 | -1.4 |
| Mte11             | 3 | 1086.2 | 483.8  | 359.6  | 325.4  | 514.3 | 422.0 | 564.1  | 181.7 | 276.6 | 4.5  | 2.1 | 1.6  | 1.4  | 2.2  | 1.8  | 2.3  | -1.3 | 1.2  |
| D230021J<br>17Rik | 3 | 47.9   | 16.8   | 12.8   | 17.0   | 28.0  | 19.2  | 28.7   | 11.4  | 18.1  | 4.3  | 1.6 | 1.2  | 1.5  | 2.6  | 1.7  | 2.6  | -1.0 | 1.6  |
| 2410127L<br>17Rik | 3 | 4498.0 | 2750.9 | 1773.7 | 1051.8 | 846.3 | 814.6 | 667.4  | 457.6 | 921.7 | 6.6  | 4.4 | 2.8  | 1.6  | 1.3  | 1.2  | 1.0  | -1.3 | 1.4  |
| Alpl              | 3 | 177.2  | 186.0  | 97.3   | 44.6   | 42.0  | 33.2  | 45.5   | 62.2  | 54.5  | 4.6  | 4.7 | 2.6  | 1.1  | -1.1 | -1.3 | 1.1  | 1.6  | 1.3  |
| A030007<br>N12Rik | 3 | 50.2   | 40.8   | 39.5   | 11.0   | 28.2  | 15.1  | 27.9   | 9.6   | 11.3  | 4.5  | 3.5 | 2.9  | -1.1 | 2.2  | 1.2  | 2.2  | -1.3 | -1.1 |
| BC02396<br>9      | 3 | 612.0  | 532.7  | 273.5  | 188.6  | 120.5 | 227.9 | 143.7  | 114.9 | 53.4  | 5.7  | 4.6 | 2.7  | 1.4  | 1.0  | 2.0  | 1.3  | -1.0 | -2.2 |
| D10Eird7<br>55e   | 3 | 64.8   | 24.7   | 19.1   | 12.6   | 27.4  | 23.3  | 23.4   | 12.2  | 13.9  | 4.7  | 2.0 | 1.8  | 1.0  | 2.1  | 1.9  | 1.8  | 1.0  | 1.1  |
| Npvf              | 3 | 141.5  | 49.1   | 32.7   | 59.7   | 42.0  | 34.3  | 40.7   | 40.6  | 59.9  | 4.6  | 1.7 | 1.2  | 2.0  | 1.4  | 1.2  | 1.4  | 1.5  | 2.0  |
| Gm4354            | 3 | 3098.0 | 2189.6 | 1678.8 | 205.3  | 930.6 | 816.5 | 1051.6 | 303.0 | 601.7 | 4.4  | 3.2 | 2.5  | -2.9 | 1.3  | 1.2  | 1.5  | -2.2 | -1.2 |
| Nav1              | 3 | 1390.4 | 1038.0 | 668.4  | 170.1  | 259.7 | 215.1 | 215.5  | 94.4  | 269.4 | 6.2  | 4.8 | 2.8  | -1.4 | 1.1  | -1.1 | -1.1 | -2.4 | 1.1  |
| Csn3              | 3 | 1895.1 | 39.1   | 29.6   | 23.9   | 18.1  | 20.2  | 16.7   | 16.7  | 32.0  | 75.0 | 2.1 | 1.5  | 1.2  | -1.1 | 1.0  | -1.1 | -1.2 | 1.5  |
| Kenk1             | 3 | 891.9  | 194.3  | 73.0   | 82.9   | 111.5 | 205.1 | 77.9   | 82.3  | 299.9 | 6.7  | 1.5 | -1.6 | -1.2 | -1.0 | 1.7  | -1.5 | -1.3 | 2.4  |
| Frem2             | 3 | 645.9  | 226.5  | 119.4  | 37.3   | 86.4  | 190.9 | 119.7  | 33.5  | 89.8  | 5.5  | 2.0 | 1.1  | -3.5 | -1.3 | 1.7  | -1.0 | -3.3 | -1.3 |
| Prtg              | 3 | 1006.3 | 462.3  | 222.8  | 95.0   | 112.3 | 120.4 | 114.8  | 56.5  | 91.6  | 6.3  | 3.2 | 1.5  | -1.5 | -1.3 | -1.2 | -1.3 | -2.7 | -1.6 |
| 2610028L<br>16Rik | 3 | 249.9  | 109.8  | 50.9   | 22.0   | 59.0  | 74.6  | 66.5   | 25.0  | 30.5  | 4.9  | 2.0 | 1.1  | -2.2 | 1.1  | 1.4  | 1.3  | -2.3 | -1.7 |
| Kene3             | 3 | 82.6   | 36.7   | 35.7   | 47.4   | 14.8  | 12.8  | 9.2    | 9.1   | 8.0   | 4.3  | 2.5 | 1.5  | 2.0  | -1.4 | -1.6 | -2.1 | -1.9 | -2.5 |
| Phlda1            | 3 | 1637.1 | 464.1  | 340.6  | 648.4  | 337.2 | 471.0 | 287.0  | 138.5 | 111.0 | 4.2  | 1.4 | -1.0 | 1.7  | -1.1 | 1.3  | -1.3 | -2.8 | -3.3 |
| Crym              | 3 | 420.9  | 323.7  | 60.6   | 18.1   | 16.8  | 16.4  | 15.3   | 92.2  | 19.6  | 4.8  | 3.7 | -1.4 | -4.3 | -4.7 | -5.1 | -4.8 | 1.0  | -4.1 |
| Cbln2             | 3 | 900.1  | 164.9  | 57.2   | 26.9   | 34.1  | 26.8  | 29.7   | 66.5  | 42.7  | 10.0 | 1.8 | -1.5 | -3.1 | -2.7 | -3.2 | -3.0 | -1.4 | -2.0 |



|               |   |         |        |         |         |         |        |        |         |        |       |       |       |       |       |       |       |       |       |
|---------------|---|---------|--------|---------|---------|---------|--------|--------|---------|--------|-------|-------|-------|-------|-------|-------|-------|-------|-------|
| Dleu7         | 3 | 92.8    | 16.0   | 14.4    | 15.6    | 12.9    | 20.7   | 12.7   | 15.0    | 22.1   | 4.5   | -1.2  | -1.4  | -1.3  | -1.6  | -1.0  | -1.7  | -1.2  | 1.0   |
| Lin28a        | 3 | 511.1   | 228.7  | 26.2    | 10.7    | 8.1     | 10.6   | 7.8    | 7.0     | 10.6   | 5.0   | 1.9   | -3.3  | -9.3  | -12.6 | -9.6  | -13.2 | -13.3 | -9.8  |
| Hmx1          | 4 | 2618.8  | 2908.8 | 2473.2  | 1368.7  | 1381.9  | 1127.8 | 1230.9 | 936.3   | 443.8  | 30.3  | 32.3  | 27.3  | 15.6  | 15.5  | 12.8  | 14.0  | 10.4  | 5.0   |
| Pitx3         | 4 | 1191.0  | 1522.6 | 1333.9  | 1080.3  | 936.5   | 511.9  | 971.1  | 642.4   | 521.5  | 14.7  | 18.6  | 16.1  | 11.7  | 10.7  | 5.9   | 11.1  | 7.0   | 6.0   |
| Camk1d        | 4 | 521.5   | 565.3  | 488.7   | 337.8   | 341.9   | 347.7  | 360.1  | 167.0   | 89.5   | 13.9  | 15.1  | 11.2  | 8.8   | 8.2   | 8.7   | 9.0   | 4.2   | 2.3   |
| Foxe3         | 4 | 1097.0  | 1962.6 | 1077.4  | 379.3   | 398.0   | 122.3  | 322.5  | 373.3   | 196.0  | 19.8  | 33.3  | 20.3  | 7.1   | 7.8   | 2.5   | 6.3   | 7.8   | 4.0   |
| Slc38a3       | 4 | 411.6   | 618.4  | 585.2   | 372.3   | 430.1   | 371.1  | 517.0  | 416.4   | 149.6  | 5.8   | 9.2   | 9.5   | 5.6   | 6.1   | 5.5   | 7.4   | 6.0   | 2.2   |
| Fam198b       | 4 | 788.7   | 1916.8 | 3410.7  | 1326.8  | 1049.5  | 960.2  | 953.7  | 591.2   | 9.6    | 6.3   | 14.6  | 26.0  | 10.2  | 7.7   | 7.3   | 7.1   | 4.7   | -13.7 |
| Plekhg1       | 4 | 1670.5  | 1665.6 | 1921.5  | 1592.9  | 1546.9  | 421.9  | 1806.0 | 1188.6  | 514.1  | 6.8   | 6.2   | 7.6   | 5.9   | 5.8   | 1.6   | 6.8   | 4.6   | 2.0   |
| Tox2          | 4 | 1533.5  | 1986.3 | 1685.3  | 1622.2  | 1760.2  | 1405.1 | 1766.2 | 1348.2  | 1048.6 | 4.1   | 4.9   | 4.3   | 4.2   | 4.6   | 3.6   | 4.5   | 3.5   | 2.7   |
| Fam19a4       | 4 | 126.2   | 203.6  | 126.8   | 133.9   | 136.8   | 132.8  | 143.2  | 95.5    | 67.9   | 3.7   | 4.9   | 3.8   | 4.1   | 4.1   | 3.8   | 4.1   | 2.6   | 1.9   |
| 4632427E13Rik | 4 | 292.8   | 308.6  | 285.1   | 79.4    | 242.5   | 269.1  | 215.5  | 116.2   | 63.2   | 5.0   | 5.0   | 4.8   | 1.1   | 4.0   | 4.4   | 3.5   | 2.1   | 1.0   |
| Casz1         | 4 | 101.9   | 138.7  | 130.1   | 120.1   | 118.5   | 97.9   | 116.9  | 94.3    | 41.2   | 2.8   | 4.0   | 3.2   | 3.0   | 2.9   | 2.3   | 2.7   | 2.1   | -1.0  |
| Cgnl1         | 4 | 522.5   | 678.8  | 494.9   | 555.3   | 445.7   | 437.3  | 378.5  | 375.3   | 196.4  | 2.9   | 4.1   | 3.0   | 3.2   | 2.5   | 2.6   | 2.2   | 2.3   | 1.2   |
| Bid           | 4 | 502.8   | 541.8  | 472.4   | 361.4   | 249.3   | 268.4  | 217.7  | 198.3   | 190.9  | 4.0   | 4.5   | 4.2   | 3.0   | 2.1   | 2.3   | 1.8   | 1.7   | 1.6   |
| Trib1         | 4 | 318.6   | 395.1  | 463.8   | 227.7   | 261.6   | 227.4  | 206.9  | 328.4   | 129.4  | 3.3   | 4.1   | 4.6   | 2.2   | 2.6   | 2.2   | 2.0   | 3.1   | 1.3   |
| Gata3         | 4 | 226.2   | 283.8  | 245.1   | 280.0   | 136.4   | 152.2  | 111.7  | 87.8    | 32.0   | 3.4   | 4.7   | 3.6   | 4.3   | 2.0   | 2.3   | 1.8   | 1.3   | -2.0  |
| Parm1         | 4 | 1310.1  | 1664.1 | 1375.4  | 733.8   | 762.1   | 835.4  | 741.3  | 591.6   | 441.6  | 3.1   | 4.0   | 3.4   | 1.8   | 1.8   | 2.0   | 1.8   | 1.5   | 1.1   |
| Myb           | 4 | 1170.5  | 554.4  | 422.0   | 313.7   | 479.6   | 473.9  | 200.2  | 1069.6  | 47.3   | 5.0   | 2.8   | 2.1   | 1.3   | 1.9   | 2.1   | -1.0  | 4.4   | -4.7  |
| Scube3        | 4 | 872.6   | 908.8  | 564.3   | 267.7   | 215.1   | 186.7  | 178.8  | 118.5   | 70.4   | 5.1   | 5.7   | 3.4   | 1.6   | 1.2   | 1.1   | 1.1   | -1.4  | -2.3  |
| Tmem132a      | 4 | 1588.8  | 1733.2 | 1546.9  | 810.6   | 667.6   | 514.2  | 495.2  | 496.4   | 239.0  | 3.3   | 4.1   | 3.4   | 1.8   | 1.5   | 1.1   | 1.1   | 1.1   | -1.9  |
| Sfrp2         | 4 | 11545.0 | 9058.9 | 5124.8  | 333.1   | 188.9   | 246.3  | 28.3   | 144.3   | 13.9   | 8.7   | 6.7   | 3.8   | -3.3  | -7.6  | -5.5  | -42.0 | -8.4  | -96.5 |
| Aldh1a1       | 5 | 6288.4  | 9761.0 | 10899.4 | 9764.9  | 10791.8 | 9837.6 | 9976.7 | 10209.8 | 7555.0 | 144.7 | 221.3 | 244.9 | 220.1 | 241.4 | 219.6 | 221.5 | 230.6 | 168.7 |
| Capn3         | 5 | 1931.7  | 5817.5 | 16518.9 | 12196.0 | 12435.3 | 6296.0 | 8434.2 | 6584.5  | 31.7   | 98.5  | 215.3 | 608.5 | 455.1 | 467.2 | 232.2 | 307.6 | 236.2 | 1.2   |
| Htra3         | 5 | 1352.7  | 2260.0 | 3419.5  | 3146.7  | 3658.0  | 3159.8 | 3523.5 | 2524.0  | 936.9  | 20.2  | 33.9  | 54.5  | 46.6  | 54.7  | 47.1  | 53.4  | 36.9  | 14.1  |
| Gja8          | 5 | 461.0   | 1058.2 | 2613.2  | 688.0   | 1443.6  | 533.3  | 1623.1 | 1319.3  | 412.7  | 16.3  | 37.7  | 88.4  | 24.8  | 50.5  | 18.4  | 56.2  | 45.9  | 14.2  |

|         |   |        |         |         |         |         |         |         |         |         |       |       |        |        |        |        |        |        |        |
|---------|---|--------|---------|---------|---------|---------|---------|---------|---------|---------|-------|-------|--------|--------|--------|--------|--------|--------|--------|
| Npl     | 5 | 1867.4 | 2757.5  | 3553.8  | 2484.8  | 3527.3  | 3011.6  | 3136.3  | 2544.5  | 1856.4  | 17.6  | 26.5  | 33.4   | 23.3   | 34.0   | 28.5   | 29.5   | 23.7   | 17.6   |
| Saped1  | 5 | 821.0  | 1282.6  | 1520.5  | 1469.4  | 1116.7  | 1251.2  | 1142.8  | 872.8   | 835.1   | 14.9  | 22.8  | 26.8   | 26.4   | 20.1   | 22.1   | 19.8   | 15.7   | 14.8   |
| Rbm24   | 5 | 542.4  | 3358.7  | 4207.0  | 2916.7  | 2113.0  | 2538.5  | 2376.2  | 1574.3  | 2063.3  | 6.4   | 19.6  | 32.6   | 24.5   | 18.2   | 21.8   | 20.5   | 13.4   | 17.8   |
| Adams18 | 5 | 190.3  | 455.6   | 898.9   | 698.6   | 746.4   | 909.2   | 829.0   | 312.9   | 400.2   | 5.5   | 11.2  | 23.8   | 18.5   | 19.4   | 24.1   | 21.3   | 7.9    | 10.6   |
| Sowaha  | 5 | 66.2   | 212.5   | 702.3   | 287.2   | 144.1   | 215.8   | 175.1   | 95.6    | 74.6    | 7.0   | 18.4  | 65.5   | 27.4   | 14.3   | 20.4   | 16.9   | 8.8    | 7.2    |
| Col4a5  | 5 | 1392.1 | 3120.6  | 4840.3  | 3618.0  | 2824.5  | 3455.5  | 2655.8  | 1825.7  | 2373.6  | 6.7   | 10.5  | 17.3   | 15.4   | 11.8   | 14.3   | 11.1   | 8.0    | 9.8    |
| Prx     | 5 | 165.9  | 713.8   | 1949.1  | 1057.3  | 2103.3  | 1655.1  | 2132.2  | 1632.5  | 425.9   | 2.5   | 8.0   | 23.4   | 14.6   | 24.3   | 20.1   | 23.8   | 17.8   | 5.2    |
| Zfp185  | 5 | 197.5  | 511.3   | 821.9   | 553.8   | 738.4   | 583.9   | 764.0   | 473.2   | 358.9   | 3.9   | 8.6   | 16.3   | 12.4   | 14.9   | 11.8   | 15.1   | 9.4    | 7.3    |
| Slc7a5  | 5 | 1964.1 | 4327.8  | 5145.7  | 3771.0  | 2633.4  | 2778.2  | 3051.8  | 2121.5  | 478.6   | 8.3   | 16.4  | 22.3   | 17.5   | 11.9   | 12.6   | 13.5   | 9.5    | 2.2    |
| Ank2    | 5 | 629.2  | 2043.4  | 4077.0  | 4325.2  | 3022.6  | 3880.7  | 3413.8  | 2144.3  | 1312.7  | 2.6   | 7.8   | 15.8   | 16.0   | 12.0   | 14.9   | 13.1   | 8.2    | 5.0    |
| Ezr     | 5 | 1912.9 | 2345.9  | 3110.5  | 2786.0  | 2419.6  | 2686.1  | 2432.2  | 1652.3  | 1761.0  | 6.8   | 8.0   | 10.8   | 9.9    | 7.9    | 9.3    | 8.2    | 5.8    | 6.1    |
| Slc3a2  | 5 | 2975.7 | 4279.2  | 5541.5  | 4348.5  | 5788.5  | 4868.8  | 5812.1  | 4415.2  | 2783.9  | 3.9   | 5.0   | 6.7    | 5.3    | 6.9    | 5.9    | 6.8    | 5.4    | 3.4    |
| S1pr5   | 5 | 22.9   | 62.2    | 140.1   | 95.0    | 72.6    | 60.1    | 57.8    | 37.0    | 17.6    | 2.3   | 5.3   | 14.4   | 8.8    | 7.0    | 5.9    | 5.7    | 3.7    | 1.7    |
| Fam214b | 5 | 277.2  | 454.4   | 945.9   | 890.2   | 956.2   | 753.7   | 975.4   | 450.6   | 347.7   | 2.4   | 4.0   | 7.6    | 7.3    | 7.7    | 6.2    | 7.9    | 4.0    | 2.8    |
| Ma1b    | 5 | 283.0  | 479.3   | 419.8   | 356.0   | 330.9   | 351.7   | 411.3   | 250.6   | 102.9   | 3.4   | 6.0   | 5.5    | 4.3    | 3.9    | 4.4    | 5.2    | 3.2    | 1.3    |
| Pnpla6  | 5 | 175.5  | 293.1   | 565.0   | 403.8   | 370.7   | 490.3   | 388.9   | 409.7   | 156.7   | 1.9   | 3.0   | 5.7    | 4.5    | 3.7    | 5.0    | 3.9    | 3.7    | 1.6    |
| Ddx26b  | 5 | 611.1  | 1781.5  | 2651.4  | 1029.1  | 1931.1  | 2337.8  | 1680.3  | 564.6   | 113.1   | 2.6   | 5.7   | 9.5    | 3.3    | 6.3    | 7.8    | 5.4    | 1.8    | -2.7   |
| Naaa    | 5 | 107.6  | 173.7   | 291.0   | 212.2   | 251.5   | 221.6   | 225.8   | 173.8   | 141.1   | 1.6   | 2.5   | 5.1    | 3.6    | 4.3    | 3.9    | 4.0    | 3.0    | 2.5    |
| Crygd   | 6 | 273.1  | 554.1   | 13411.1 | 26053.0 | 22602.4 | 26042.6 | 23339.4 | 27073.4 | 25517.2 | 61.8  | 47.0  | 871.9  | 1682.0 | 1444.1 | 1673.9 | 1514.9 | 1752.3 | 1640.6 |
| Crygb   | 6 | 25.3   | 208.3   | 10667.4 | 24642.0 | 19873.2 | 23485.6 | 20608.4 | 23628.2 | 23446.8 | 11.6  | 13.4  | 749.6  | 1691.4 | 1392.1 | 1645.1 | 1456.2 | 1661.2 | 1644.0 |
| Crygc   | 6 | 25.3   | 208.3   | 10667.4 | 24642.0 | 19873.2 | 23485.6 | 20608.4 | 23628.2 | 23446.8 | 11.6  | 13.4  | 749.6  | 1691.4 | 1392.1 | 1645.1 | 1456.2 | 1661.2 | 1644.0 |
| Cryba1  | 6 | 2455.0 | 18264.5 | 28381.9 | 27502.6 | 24954.4 | 27103.0 | 24817.0 | 27257.2 | 25392.3 | 192.3 | 648.1 | 1092.9 | 1070.4 | 979.6  | 1060.8 | 967.4  | 1070.4 | 993.9  |
| Cryaa   | 6 | 6096.3 | 22231.3 | 26968.8 | 26084.9 | 26887.7 | 27032.7 | 27180.5 | 25970.2 | 25996.0 | 300.0 | 693.1 | 909.5  | 878.0  | 897.0  | 902.0  | 907.0  | 869.5  | 867.1  |
| Mip     | 6 | 273.1  | 2431.3  | 12285.2 | 17325.8 | 11418.9 | 12722.5 | 12345.0 | 12850.3 | 14507.9 | 52.2  | 188.3 | 1024.7 | 1510.7 | 1011.3 | 1122.1 | 1095.2 | 1130.7 | 1282.7 |
| Crygs   | 6 | 228.4  | 885.4   | 3138.6  | 13952.1 | 19483.6 | 19210.4 | 21787.8 | 22036.0 | 24560.8 | 35.3  | 47.1  | 198.9  | 907.7  | 1195.2 | 1193.5 | 1355.9 | 1366.2 | 1525.4 |
| Cryba4  | 6 | 35.7   | 639.6   | 15661.3 | 21856.6 | 24935.6 | 21977.3 | 24851.2 | 23108.2 | 22000.5 | 10.7  | 38.6  | 778.2  | 1069.0 | 1235.6 | 1082.4 | 1234.7 | 1139.4 | 1083.9 |

|         |   |        |         |         |         |         |         |         |         |         |       |       |       |       |       |       |       |       |       |
|---------|---|--------|---------|---------|---------|---------|---------|---------|---------|---------|-------|-------|-------|-------|-------|-------|-------|-------|-------|
| Cryba2  | 6 | 276.9  | 3502.8  | 16897.9 | 23258.7 | 25397.8 | 24152.0 | 25170.9 | 25521.6 | 26123.5 | 27.0  | 111.6 | 527.9 | 737.2 | 802.3 | 765.9 | 799.0 | 811.8 | 828.3 |
| Crybb1  | 6 | 428.3  | 10518.5 | 25522.8 | 25844.1 | 28954.5 | 25627.5 | 29168.3 | 27191.0 | 22185.1 | 24.3  | 180.3 | 437.8 | 447.3 | 497.0 | 446.6 | 509.9 | 470.8 | 386.7 |
| Crybb3  | 6 | 5597.3 | 13149.4 | 27963.6 | 26321.3 | 26031.0 | 25269.5 | 25921.0 | 27533.1 | 22585.4 | 106.4 | 194.4 | 375.3 | 372.5 | 364.8 | 354.1 | 363.8 | 391.5 | 316.5 |
| Gja3    | 6 | 329.3  | 2151.7  | 3472.3  | 6645.7  | 3993.7  | 5074.9  | 4478.8  | 3915.6  | 3911.5  | 49.4  | 153.5 | 334.3 | 640.5 | 378.5 | 481.4 | 424.9 | 382.9 | 376.6 |
| Lim2    | 6 | 168.0  | 1906.1  | 7746.7  | 15812.9 | 15951.3 | 11452.0 | 17410.0 | 17222.7 | 14574.5 | 10.3  | 42.7  | 169.6 | 379.8 | 382.4 | 275.1 | 418.8 | 412.7 | 350.2 |
| Mgarp   | 6 | 4386.9 | 4743.2  | 6962.7  | 7464.6  | 7365.8  | 9247.4  | 8277.2  | 9353.2  | 10036.7 | 56.9  | 63.8  | 94.4  | 99.0  | 97.0  | 121.8 | 109.2 | 121.7 | 132.2 |
| Cryab   | 6 | 4051.4 | 5326.4  | 6239.7  | 18040.6 | 16928.8 | 19925.1 | 20418.2 | 23520.6 | 25273.6 | 31.3  | 39.9  | 45.6  | 124.6 | 120.5 | 139.2 | 141.9 | 162.9 | 176.6 |
| Crygf   | 6 | 73.1   | 176.2   | 8083.8  | 21346.0 | 17170.6 | 20288.6 | 18117.6 | 19468.6 | 12774.1 | 8.9   | 3.7   | 164.3 | 459.2 | 369.6 | 431.7 | 385.3 | 413.6 | 271.9 |
| Bfsp1   | 6 | 57.5   | 113.3   | 675.3   | 10137.9 | 12403.8 | 9699.6  | 13701.7 | 14716.5 | 18457.2 | 4.0   | 3.1   | 20.3  | 278.2 | 342.3 | 266.5 | 378.2 | 400.6 | 507.8 |
| Tdrd7   | 6 | 645.1  | 1209.5  | 4162.8  | 8840.7  | 11917.8 | 9706.4  | 13043.7 | 11930.1 | 10403.6 | 7.5   | 9.4   | 38.2  | 79.3  | 107.4 | 86.6  | 115.8 | 103.4 | 92.8  |
| Cp      | 6 | 629.3  | 934.9   | 1444.4  | 2454.1  | 2332.7  | 2606.0  | 2709.4  | 2064.9  | 3303.4  | 15.0  | 19.6  | 31.6  | 59.6  | 51.7  | 60.2  | 61.6  | 46.2  | 76.3  |
| Bfsp2   | 6 | 111.2  | 251.1   | 1252.1  | 778.3   | 12317.5 | 8258.5  | 13957.8 | 9879.6  | 8511.6  | 2.4   | 6.2   | 25.6  | 16.8  | 265.2 | 173.6 | 296.3 | 213.9 | 181.0 |
| Dkk3    | 6 | 1854.5 | 1531.6  | 3265.5  | 5086.8  | 7266.6  | 6631.9  | 8278.2  | 6169.8  | 7962.5  | 14.4  | 11.5  | 25.0  | 37.4  | 54.1  | 49.9  | 62.4  | 47.9  | 60.0  |
| Tmem40  | 6 | 155.7  | 626.5   | 2511.6  | 2824.0  | 7381.6  | 3993.9  | 7848.0  | 5990.6  | 7251.7  | 2.5   | 6.2   | 26.4  | 28.2  | 76.0  | 40.1  | 79.8  | 59.5  | 72.6  |
| Gpr137b | 6 | 141.6  | 383.4   | 779.8   | 913.1   | 1088.9  | 449.3   | 1217.4  | 628.1   | 1046.1  | 6.1   | 11.9  | 29.8  | 38.5  | 48.0  | 19.4  | 54.3  | 26.2  | 45.1  |
| Slc7a2  | 6 | 95.9   | 252.9   | 311.2   | 965.7   | 1146.7  | 1557.3  | 1452.6  | 1023.4  | 1293.1  | 3.8   | 7.5   | 10.7  | 32.0  | 37.5  | 49.5  | 47.3  | 32.0  | 41.1  |
| Zbtb8b  | 6 | 579.7  | 770.0   | 1058.8  | 940.9   | 664.6   | 782.7   | 825.5   | 867.1   | 877.9   | 14.3  | 18.6  | 25.3  | 23.5  | 16.0  | 19.3  | 20.5  | 21.2  | 21.8  |
| Cpeb1   | 6 | 24.9   | 74.6    | 192.3   | 491.9   | 390.6   | 575.3   | 437.5   | 400.6   | 455.6   | 2.4   | 5.2   | 17.0  | 41.2  | 30.3  | 48.9  | 38.3  | 33.1  | 38.6  |
| Pla2g16 | 6 | 218.3  | 356.2   | 1516.1  | 6014.2  | 7426.1  | 8248.3  | 9047.2  | 7151.1  | 6329.6  | 2.1   | 2.6   | 10.7  | 38.8  | 53.8  | 55.9  | 60.9  | 51.1  | 42.9  |
| Rsph10b | 6 | 18.1   | 14.1    | 48.5    | 1083.5  | 849.5   | 1450.9  | 1284.0  | 819.3   | 1511.5  | 1.5   | 1.1   | 3.7   | 76.7  | 66.2  | 110.0 | 97.3  | 61.4  | 114.4 |
| Gss     | 6 | 206.4  | 382.7   | 1170.8  | 2540.4  | 2678.5  | 1961.4  | 2798.9  | 2336.0  | 2049.0  | 2.9   | 4.6   | 12.8  | 28.0  | 30.2  | 22.1  | 31.1  | 26.1  | 23.0  |
| Dock5   | 6 | 217.7  | 331.2   | 541.2   | 1285.4  | 2057.3  | 1373.9  | 2014.4  | 1016.8  | 1449.2  | 3.3   | 3.6   | 9.0   | 19.1  | 30.2  | 20.4  | 30.5  | 14.9  | 21.6  |
| Sym     | 6 | 20.3   | 53.9    | 327.5   | 933.3   | 1792.3  | 1758.7  | 2363.2  | 595.5   | 1617.7  | 1.1   | 2.1   | 11.5  | 38.9  | 67.6  | 65.2  | 87.1  | 21.7  | 59.3  |
| Usp15   | 6 | 38.6   | 160.4   | 526.1   | 1440.1  | 1020.9  | 1371.6  | 1216.3  | 1051.9  | 1108.7  | 1.4   | 2.8   | 8.8   | 35.9  | 25.6  | 33.8  | 31.1  | 24.6  | 28.0  |
| Slc7a8  | 6 | 97.1   | 183.0   | 200.7   | 901.6   | 258.8   | 469.7   | 313.5   | 248.4   | 405.4   | 4.0   | 6.3   | 7.1   | 30.6  | 8.4   | 16.2  | 10.5  | 8.6   | 14.1  |
| Sfrp1   | 6 | 666.3  | 2821.5  | 4311.3  | 5788.7  | 6541.3  | 3497.0  | 6692.4  | 5159.1  | 6171.5  | 2.2   | 7.4   | 11.2  | 16.7  | 17.4  | 9.4   | 18.1  | 12.8  | 16.7  |

|                   |   |        |        |        |        |        |        |        |        |        |      |      |      |      |      |      |      |      |      |
|-------------------|---|--------|--------|--------|--------|--------|--------|--------|--------|--------|------|------|------|------|------|------|------|------|------|
| Pon2              | 6 | 332.7  | 616.4  | 1368.8 | 2701.4 | 2281.1 | 1950.4 | 2634.2 | 1604.6 | 3193.2 | 2.3  | 3.7  | 8.1  | 17.3 | 14.5 | 11.9 | 16.2 | 10.1 | 19.8 |
| Pkp2              | 6 | 352.1  | 370.8  | 889.6  | 1162.2 | 1398.6 | 1185.8 | 1311.8 | 924.1  | 1495.9 | 3.5  | 3.4  | 9.4  | 12.3 | 15.4 | 12.6 | 14.0 | 9.8  | 15.9 |
| Malat1            | 6 | 365.4  | 314.0  | 755.8  | 692.7  | 1931.1 | 2801.2 | 1781.2 | 1234.3 | 1143.1 | 3.9  | 3.5  | 6.6  | 7.0  | 18.4 | 27.2 | 17.3 | 10.8 | 11.1 |
| Fam89a            | 6 | 59.5   | 57.7   | 219.4  | 1244.8 | 2147.6 | 999.1  | 2863.8 | 1364.3 | 1722.6 | 1.6  | 1.1  | 4.2  | 24.6 | 44.7 | 20.6 | 57.2 | 27.9 | 35.5 |
| Slc35f3           | 6 | 35.1   | 68.1   | 80.4   | 345.8  | 344.2  | 240.5  | 477.8  | 234.5  | 411.1  | 1.5  | 2.3  | 3.4  | 17.5 | 16.4 | 11.5 | 22.5 | 11.8 | 19.5 |
| Susd2             | 6 | 151.8  | 97.1   | 94.8   | 234.4  | 226.5  | 250.3  | 289.7  | 177.8  | 259.0  | 5.7  | 3.9  | 3.7  | 8.9  | 7.4  | 9.2  | 10.1 | 6.9  | 9.6  |
| Coro2b            | 6 | 224.8  | 218.5  | 463.1  | 2058.8 | 1812.4 | 2317.2 | 2121.5 | 1462.4 | 1555.2 | 2.3  | 1.6  | 3.9  | 20.3 | 17.1 | 22.5 | 20.0 | 13.4 | 15.1 |
| Prkab2            | 6 | 132.1  | 170.7  | 208.9  | 805.7  | 1025.0 | 949.8  | 1498.9 | 811.9  | 1109.4 | 2.1  | 2.1  | 3.1  | 11.5 | 15.5 | 13.5 | 21.5 | 11.8 | 15.8 |
| Mitf              | 6 | 75.7   | 125.2  | 137.2  | 391.2  | 554.5  | 764.4  | 568.5  | 464.9  | 666.1  | 2.2  | 3.5  | 3.8  | 11.4 | 15.6 | 22.0 | 16.3 | 13.2 | 19.2 |
| Ypel2             | 6 | 515.0  | 1367.1 | 1654.9 | 1772.2 | 1778.1 | 1513.6 | 2192.6 | 1454.9 | 1828.1 | 2.7  | 5.2  | 7.6  | 9.4  | 9.3  | 8.0  | 11.7 | 7.7  | 9.7  |
| Ptplad2           | 6 | 158.3  | 271.7  | 528.3  | 880.2  | 1137.4 | 834.0  | 1000.3 | 774.6  | 1052.2 | 2.0  | 3.2  | 6.2  | 10.4 | 13.6 | 9.9  | 11.7 | 8.7  | 12.5 |
| Gstm6             | 6 | 35.8   | 64.1   | 71.9   | 328.6  | 191.8  | 301.3  | 215.7  | 276.6  | 150.1  | 1.9  | 2.8  | 4.5  | 18.5 | 10.8 | 16.7 | 12.2 | 16.4 | 8.3  |
| 1110059<br>G02Rik | 6 | 265.0  | 258.0  | 523.1  | 1160.5 | 1112.6 | 886.4  | 1132.4 | 780.7  | 1061.7 | 2.9  | 3.0  | 6.1  | 14.1 | 13.0 | 10.4 | 13.2 | 8.8  | 12.5 |
| Hfe               | 6 | 38.4   | 56.4   | 100.8  | 545.4  | 621.4  | 807.2  | 490.8  | 259.6  | 624.9  | 1.3  | 1.7  | 3.1  | 17.0 | 19.5 | 25.3 | 15.3 | 8.7  | 19.5 |
| Nrcam             | 6 | 28.7   | 241.6  | 1384.7 | 2317.5 | 3748.9 | 2847.8 | 4166.6 | 3231.9 | 4553.8 | -2.7 | 1.2  | 9.7  | 16.7 | 25.8 | 19.5 | 28.8 | 22.1 | 31.2 |
| Ell2              | 6 | 1273.6 | 1624.1 | 3636.5 | 4834.0 | 2619.4 | 3003.2 | 2722.7 | 2559.3 | 3745.5 | 4.5  | 4.0  | 10.0 | 15.1 | 8.0  | 9.2  | 8.3  | 8.2  | 11.5 |
| Six6              | 6 | 66.1   | 99.0   | 56.5   | 53.1   | 162.6  | 379.9  | 71.0   | 346.4  | 87.0   | 4.7  | 6.3  | 4.1  | 4.0  | 11.4 | 26.9 | 5.1  | 26.1 | 6.2  |
| Pcp4              | 6 | 48.3   | 150.1  | 628.9  | 3805.7 | 4135.9 | 5007.8 | 5324.2 | 4597.2 | 4474.2 | -2.0 | -1.1 | 4.1  | 23.8 | 26.6 | 32.8 | 34.9 | 30.1 | 28.8 |
| Rspo1             | 6 | 61.1   | 200.2  | 421.4  | 1070.2 | 1014.8 | 1073.3 | 991.5  | 668.9  | 1360.2 | 1.2  | 2.7  | 5.5  | 14.6 | 13.4 | 14.4 | 13.2 | 8.9  | 18.3 |
| Crhbp             | 6 | 16.0   | 41.9   | 36.4   | 30.0   | 468.0  | 960.8  | 416.0  | 437.4  | 581.1  | 1.2  | 2.7  | 2.9  | 2.7  | 33.6 | 70.9 | 26.8 | 30.4 | 42.8 |
| Rnf180            | 6 | 27.2   | 23.8   | 27.6   | 4669.5 | 3114.3 | 2616.9 | 3649.4 | 3543.8 | 4523.1 | -1.1 | -2.2 | -2.0 | 88.8 | 58.5 | 50.4 | 72.8 | 70.7 | 87.1 |
| Trpm1             | 6 | 105.7  | 182.6  | 69.8   | 85.8   | 184.0  | 263.7  | 139.0  | 232.1  | 190.0  | 4.4  | 6.6  | 2.8  | 3.9  | 7.8  | 10.9 | 6.1  | 9.2  | 7.9  |
| Map3k5            | 6 | 85.4   | 94.8   | 89.8   | 418.4  | 617.7  | 813.8  | 717.3  | 926.9  | 1001.8 | 1.7  | 1.7  | 1.9  | 8.9  | 12.8 | 17.3 | 15.1 | 19.6 | 21.3 |
| Katnal2           | 6 | 97.2   | 181.6  | 245.8  | 276.4  | 264.9  | 224.7  | 257.9  | 126.9  | 312.2  | 3.2  | 4.9  | 8.3  | 8.8  | 8.8  | 7.5  | 8.5  | 4.3  | 10.4 |
| Palm2             | 6 | 35.4   | 28.0   | 68.9   | 1033.9 | 1795.0 | 1812.2 | 2048.2 | 1325.5 | 1060.9 | -1.1 | -1.6 | 1.5  | 21.7 | 40.6 | 37.7 | 44.1 | 28.0 | 23.7 |
| Arhgap24          | 6 | 117.1  | 154.3  | 359.8  | 749.2  | 842.1  | 625.4  | 827.0  | 447.8  | 708.2  | 1.7  | 1.9  | 5.1  | 10.3 | 11.4 | 8.7  | 11.4 | 5.9  | 9.9  |

|          |   |       |       |        |        |        |        |        |        |        |      |      |      |      |      |      |      |      |      |
|----------|---|-------|-------|--------|--------|--------|--------|--------|--------|--------|------|------|------|------|------|------|------|------|------|
| Hsf4     | 6 | 59.5  | 82.7  | 230.5  | 668.0  | 534.7  | 229.5  | 598.5  | 1144.1 | 339.8  | 1.7  | 1.8  | 5.4  | 15.6 | 12.2 | 5.4  | 14.1 | 25.8 | 8.1  |
| Pmel     | 6 | 95.2  | 272.7 | 131.4  | 141.6  | 469.0  | 649.3  | 359.0  | 662.4  | 211.1  | 1.8  | 5.4  | 2.4  | 3.3  | 8.4  | 12.1 | 6.7  | 12.3 | 3.9  |
| Vsx2     | 6 | 79.2  | 175.1 | 133.7  | 149.0  | 280.6  | 377.6  | 138.6  | 575.8  | 218.4  | 2.1  | 4.2  | 3.8  | 3.7  | 7.7  | 10.7 | 3.9  | 17.5 | 6.2  |
| Ninj1    | 6 | 397.9 | 713.3 | 2064.3 | 4498.2 | 3513.6 | 4543.4 | 4329.5 | 4534.6 | 3141.5 | 1.2  | 1.6  | 4.3  | 11.7 | 9.0  | 11.6 | 11.2 | 11.6 | 8.1  |
| Fam46c   | 6 | 361.1 | 739.5 | 1966.8 | 3857.5 | 3576.0 | 3729.9 | 3973.0 | 2965.1 | 3215.8 | 1.2  | 2.0  | 5.3  | 10.2 | 9.7  | 10.0 | 10.7 | 8.3  | 8.6  |
| Gas7     | 6 | 72.0  | 65.6  | 102.9  | 312.4  | 242.3  | 501.4  | 338.5  | 208.0  | 257.7  | 2.0  | 1.6  | 2.8  | 9.0  | 7.0  | 13.5 | 8.9  | 5.2  | 6.9  |
| Epdr1    | 6 | 97.3  | 443.0 | 911.1  | 1302.2 | 1028.4 | 1180.1 | 1031.3 | 1148.3 | 1663.5 | -1.1 | 2.4  | 5.4  | 9.3  | 6.8  | 8.0  | 7.0  | 7.9  | 11.3 |
| Glycam1  | 6 | 13.0  | 12.6  | 15.7   | 65.8   | 179.8  | 214.5  | 191.5  | 191.9  | 135.0  | 1.2  | 1.2  | 1.5  | 6.0  | 16.1 | 19.6 | 17.1 | 16.9 | 12.4 |
| Rorb     | 6 | 42.1  | 54.7  | 41.2   | 87.5   | 160.4  | 194.7  | 64.4   | 648.3  | 38.2   | 2.7  | 2.9  | 2.4  | 5.3  | 6.4  | 10.0 | 3.5  | 26.4 | 2.0  |
| Hspb2    | 6 | 212.0 | 161.5 | 237.7  | 837.9  | 620.7  | 657.3  | 846.2  | 977.5  | 631.7  | 2.1  | 1.7  | 2.4  | 8.2  | 6.5  | 6.7  | 8.7  | 10.0 | 6.4  |
| Hist1h1c | 6 | 225.4 | 327.1 | 432.0  | 1745.5 | 2193.9 | 2873.2 | 5115.2 | 1769.7 | 3072.1 | 1.1  | 1.3  | 2.1  | 8.0  | 10.0 | 13.6 | 23.7 | 8.5  | 14.5 |
| Lrrc75b  | 6 | 21.5  | 42.7  | 48.0   | 1235.4 | 634.1  | 720.1  | 1097.0 | 1182.3 | 674.7  | -1.4 | -1.1 | -1.0 | 34.2 | 18.0 | 19.5 | 31.1 | 30.4 | 18.6 |
| Wbp2     | 6 | 354.8 | 625.0 | 738.1  | 1320.3 | 775.5  | 593.5  | 949.8  | 1010.5 | 1183.3 | 2.1  | 3.9  | 4.7  | 8.4  | 4.7  | 3.6  | 5.8  | 6.1  | 7.3  |
| Gsn      | 6 | 178.5 | 159.8 | 1031.4 | 5777.5 | 4530.2 | 6339.5 | 4733.5 | 5278.4 | 4769.7 | -1.4 | -2.6 | 1.1  | 22.3 | 16.9 | 24.4 | 17.9 | 21.2 | 18.3 |
| Cpeb3    | 6 | 23.6  | 22.0  | 36.6   | 410.8  | 335.8  | 418.1  | 452.1  | 384.7  | 527.5  | -1.1 | -1.1 | 1.4  | 15.9 | 12.7 | 16.3 | 17.5 | 14.3 | 20.6 |
| Cpq      | 6 | 115.5 | 155.2 | 261.9  | 846.7  | 856.9  | 799.0  | 1137.6 | 932.3  | 1374.9 | 1.0  | 1.2  | 2.6  | 7.7  | 7.8  | 7.3  | 10.4 | 8.9  | 12.6 |
| Scgn     | 6 | 97.7  | 114.2 | 142.2  | 258.3  | 264.2  | 321.3  | 329.8  | 479.1  | 341.9  | 2.1  | 2.2  | 2.7  | 5.7  | 5.4  | 6.6  | 6.7  | 9.4  | 7.0  |
| Prkaa2   | 6 | 26.1  | 58.2  | 169.2  | 618.3  | 542.2  | 573.8  | 693.6  | 606.4  | 567.0  | -1.5 | 1.0  | 3.6  | 13.0 | 11.8 | 12.2 | 15.0 | 11.7 | 12.2 |
| Gabrg3   | 6 | 13.1  | 15.0  | 16.9   | 81.7   | 84.4   | 164.2  | 98.5   | 28.8   | 89.5   | 1.3  | 1.7  | 1.8  | 7.6  | 8.3  | 15.7 | 8.8  | 2.6  | 8.3  |
| Qpet     | 6 | 17.2  | 24.4  | 38.2   | 353.6  | 420.3  | 319.7  | 594.7  | 353.5  | 447.1  | -1.4 | -1.0 | 1.2  | 13.3 | 15.2 | 11.4 | 20.9 | 13.2 | 16.0 |
| Tom1l1   | 6 | 158.4 | 215.2 | 412.9  | 399.4  | 425.9  | 574.7  | 400.0  | 525.5  | 542.0  | 2.2  | 2.1  | 5.2  | 5.1  | 5.3  | 7.3  | 5.0  | 6.4  | 6.8  |
| Tex2     | 6 | 81.5  | 91.2  | 215.8  | 1214.7 | 1179.4 | 1095.7 | 1280.0 | 1012.3 | 967.0  | -1.2 | -1.3 | 2.2  | 12.1 | 11.7 | 10.7 | 12.7 | 9.7  | 9.4  |
| Sorbs1   | 6 | 111.2 | 516.1 | 1969.5 | 3316.8 | 2082.4 | 4290.2 | 2159.0 | 2260.9 | 3181.4 | -1.8 | 1.1  | 5.9  | 11.3 | 7.2  | 14.7 | 7.6  | 7.7  | 10.9 |
| Stk39    | 6 | 167.4 | 516.0 | 1343.2 | 2378.8 | 1235.3 | 1425.6 | 1080.8 | 1591.9 | 1380.6 | -1.0 | 2.5  | 6.1  | 10.9 | 5.6  | 6.5  | 4.7  | 7.0  | 6.3  |
| Gas6     | 6 | 50.6  | 74.0  | 214.2  | 981.6  | 809.9  | 639.0  | 898.2  | 970.9  | 1450.0 | -1.8 | -1.1 | 2.4  | 10.6 | 8.9  | 7.1  | 9.9  | 10.7 | 16.1 |
| Add2     | 6 | 55.8  | 126.2 | 397.9  | 1440.6 | 1911.5 | 1687.5 | 1733.8 | 1441.8 | 1321.7 | -2.1 | -1.8 | 2.4  | 9.8  | 12.5 | 11.4 | 12.0 | 8.8  | 8.9  |

|         |   |        |        |         |         |         |         |         |         |        |      |       |        |        |        |        |        |        |       |
|---------|---|--------|--------|---------|---------|---------|---------|---------|---------|--------|------|-------|--------|--------|--------|--------|--------|--------|-------|
| Acss2   | 6 | 15.3   | 16.1   | 25.0    | 65.9    | 222.1   | 47.5    | 244.8   | 68.0    | 179.4  | 1.3  | 1.3   | 1.8    | 4.7    | 17.2   | 3.7    | 19.2   | 5.3    | 13.7  |
| Snx22   | 6 | 42.5   | 49.3   | 62.1    | 661.5   | 935.9   | 686.4   | 1257.2  | 831.3   | 1054.9 | -1.4 | -1.2  | 1.1    | 10.5   | 16.0   | 10.5   | 19.1   | 13.4   | 16.3  |
| Grid1   | 6 | 15.5   | 24.3   | 54.0    | 201.6   | 162.6   | 280.6   | 204.9   | 112.7   | 129.8  | -1.3 | 1.2   | 2.1    | 9.8    | 8.1    | 14.0   | 10.2   | 6.2    | 6.5   |
| Rassf5  | 6 | 19.5   | 16.2   | 19.3    | 160.2   | 190.1   | 196.2   | 257.6   | 227.8   | 215.0  | 1.1  | -1.1  | 1.0    | 8.8    | 10.3   | 10.8   | 13.8   | 12.3   | 11.8  |
| Lpin1   | 6 | 24.0   | 23.5   | 48.0    | 319.2   | 458.0   | 371.7   | 725.8   | 290.2   | 578.0  | -1.6 | -1.3  | 1.2    | 7.8    | 11.7   | 9.3    | 18.3   | 6.6    | 14.5  |
| Mapre3  | 6 | 48.3   | 107.5  | 118.3   | 454.2   | 164.0   | 171.7   | 194.0   | 269.3   | 288.6  | 1.0  | 2.3   | 2.8    | 10.5   | 3.8    | 3.8    | 4.6    | 6.9    | 6.8   |
| Rbp3    | 6 | 30.9   | 59.7   | 82.4    | 310.8   | 114.4   | 65.1    | 94.0    | 423.6   | 182.8  | -1.3 | 1.5   | 2.2    | 8.6    | 3.4    | 1.8    | 2.7    | 12.3   | 5.2   |
| Rcan2   | 6 | 24.8   | 41.5   | 280.9   | 1111.9  | 1411.1  | 620.0   | 1692.0  | 1354.1  | 2283.1 | -4.9 | -5.3  | 1.6    | 7.0    | 8.3    | 3.8    | 10.1   | 8.4    | 14.0  |
| Wfdc1   | 6 | 109.2  | 158.0  | 111.8   | 131.0   | 244.7   | 642.5   | 171.3   | 638.2   | 238.3  | 1.8  | 2.6   | 1.9    | 2.2    | 3.8    | 10.1   | 2.4    | 9.4    | 3.8   |
| Slc6a15 | 6 | 17.2   | 29.3   | 102.5   | 229.8   | 463.9   | 635.1   | 420.6   | 853.9   | 63.6   | -2.8 | -1.9  | 2.0    | 5.4    | 8.9    | 14.1   | 9.5    | 19.3   | 1.4   |
| Sfi1    | 6 | 76.2   | 103.3  | 124.8   | 83.2    | 90.9    | 114.7   | 95.6    | 442.7   | 45.9   | 2.4  | 3.1   | 3.7    | 2.7    | 2.7    | 3.5    | 2.9    | 13.2   | 1.4   |
| Vwa5a   | 6 | 151.3  | 161.2  | 801.2   | 1470.1  | 1111.5  | 1637.9  | 1316.2  | 2179.8  | 1885.8 | -1.7 | -1.6  | 3.4    | 6.2    | 4.8    | 6.9    | 5.6    | 8.9    | 7.9   |
| Hopx    | 6 | 64.8   | 78.0   | 103.7   | 2332.3  | 2304.1  | 2365.7  | 2436.7  | 975.9   | 1961.3 | -2.4 | -3.3  | -2.2   | 10.3   | 10.0   | 10.6   | 10.6   | 4.3    | 8.8   |
| Gadd45b | 6 | 66.8   | 84.2   | 86.2    | 774.4   | 1356.9  | 1165.7  | 2169.0  | 2268.5  | 1146.9 | -2.8 | -2.0  | -1.9   | 4.5    | 7.8    | 7.0    | 13.0   | 13.1   | 6.9   |
| Col6a3  | 6 | 50.2   | 205.0  | 394.0   | 1303.1  | 1255.2  | 1594.6  | 985.8   | 3415.4  | 2437.4 | -4.4 | -2.2  | 1.1    | 3.6    | 3.8    | 4.3    | 2.8    | 9.6    | 6.9   |
| Bend6   | 6 | 19.3   | 27.2   | 29.4    | 121.1   | 65.4    | 255.6   | 153.3   | 28.9    | 76.9   | -1.1 | 1.2   | 1.4    | 5.1    | 3.2    | 11.8   | 7.6    | 1.3    | 3.6   |
| Avp     | 6 | 38.2   | 43.2   | 48.8    | 213.4   | 121.5   | 187.9   | 161.8   | 2086.4  | 58.3   | -1.1 | -1.1  | 0.0    | 4.5    | 2.7    | 4.0    | 3.4    | 44.5   | 1.3   |
| Cryga   | 7 | 16.6   | 1060.2 | 16528.3 | 18381.5 | 15757.5 | 18253.3 | 16181.9 | 20076.1 | 7291.5 | 11.6 | 55.3  | 1354.9 | 1517.0 | 1289.9 | 1492.0 | 1340.0 | 1646.3 | 595.9 |
| Crygn   | 7 | 208.7  | 2360.1 | 14145.7 | 18754.4 | 19787.0 | 18829.7 | 18881.4 | 18756.2 | 2808.8 | 38.2 | 162.0 | 948.8  | 1280.1 | 1321.5 | 1285.4 | 1289.0 | 1272.1 | 191.3 |
| Trpm3   | 7 | 820.2  | 782.2  | 1143.3  | 1592.9  | 1708.4  | 2158.4  | 2075.2  | 1058.5  | 1429.0 | 35.3 | 36.2  | 53.4   | 72.1   | 74.9   | 94.7   | 91.9   | 48.9   | 62.7  |
| Vit     | 7 | 358.7  | 1181.0 | 2697.1  | 3116.5  | 3500.0  | 2594.0  | 3631.3  | 2762.9  | 2258.6 | 9.4  | 22.3  | 67.2   | 74.0   | 82.3   | 61.7   | 85.6   | 66.7   | 53.7  |
| Crim1   | 7 | 1659.0 | 2448.0 | 3507.0  | 3698.3  | 3894.8  | 5738.6  | 4430.8  | 4926.9  | 2206.3 | 21.1 | 30.0  | 43.9   | 43.8   | 51.1   | 72.6   | 56.2   | 59.7   | 27.4  |
| Pip5k1l | 7 | 52.1   | 263.1  | 902.0   | 1010.0  | 1326.9  | 1139.9  | 1306.7  | 859.0   | 574.1  | 4.3  | 13.5  | 51.2   | 57.6   | 76.0   | 65.7   | 74.4   | 48.0   | 32.9  |
| Caprin2 | 7 | 167.3  | 427.9  | 1642.7  | 4910.4  | 5903.2  | 3661.5  | 6658.6  | 2829.6  | 1334.2 | 3.1  | 4.3   | 17.7   | 54.9   | 65.0   | 40.4   | 73.8   | 31.3   | 14.7  |
| Zfp365  | 7 | 19.1   | 129.0  | 517.6   | 1504.2  | 887.1   | 454.3   | 921.4   | 314.0   | 305.6  | 2.0  | 5.6   | 34.1   | 99.4   | 59.5   | 29.7   | 62.1   | 20.7   | 20.0  |
| Gm17586 | 7 | 141.6  | 204.1  | 597.2   | 1407.7  | 1154.0  | 987.0   | 1070.3  | 623.8   | 338.4  | 3.6  | 4.8   | 14.7   | 37.7   | 28.2   | 25.1   | 27.3   | 16.5   | 8.6   |

|               |   |        |        |        |        |        |        |        |        |        |      |      |      |      |      |      |      |      |      |
|---------------|---|--------|--------|--------|--------|--------|--------|--------|--------|--------|------|------|------|------|------|------|------|------|------|
| Ptpru         | 7 | 347.8  | 639.7  | 1151.3 | 1326.6 | 1149.7 | 724.7  | 1320.9 | 1149.2 | 492.4  | 6.1  | 9.2  | 16.8 | 21.8 | 18.0 | 11.1 | 20.0 | 16.2 | 7.5  |
| Slc16a12      | 7 | 54.7   | 181.8  | 525.6  | 786.8  | 408.3  | 447.8  | 385.8  | 483.7  | 375.6  | 2.0  | 5.2  | 16.8 | 29.2 | 13.3 | 15.4 | 13.5 | 15.4 | 13.0 |
| Abca4         | 7 | 214.4  | 518.1  | 761.4  | 906.2  | 1032.6 | 677.9  | 935.3  | 644.3  | 463.3  | 3.3  | 7.9  | 11.8 | 14.2 | 15.6 | 10.6 | 14.1 | 10.3 | 7.2  |
| Nid1          | 7 | 2697.6 | 5308.9 | 5020.2 | 8192.9 | 4391.5 | 6257.7 | 4469.0 | 4103.5 | 4901.1 | 6.0  | 10.4 | 10.1 | 15.3 | 8.2  | 12.2 | 8.7  | 8.0  | 9.5  |
| Epb4.114a     | 7 | 574.7  | 866.1  | 1247.7 | 1353.6 | 1845.1 | 874.8  | 2061.6 | 1413.4 | 760.8  | 5.1  | 6.8  | 11.2 | 11.9 | 15.1 | 7.3  | 17.3 | 10.8 | 6.3  |
| Bcar3         | 7 | 385.7  | 453.8  | 579.1  | 760.0  | 748.3  | 802.6  | 905.2  | 548.7  | 442.8  | 6.3  | 7.3  | 9.3  | 12.1 | 11.8 | 12.8 | 14.4 | 8.8  | 7.1  |
| Slc24a4       | 7 | 34.9   | 46.4   | 172.5  | 959.6  | 1123.5 | 885.4  | 1579.9 | 828.4  | 662.7  | 1.1  | 1.5  | 5.4  | 28.9 | 35.4 | 27.2 | 45.5 | 23.9 | 20.3 |
| Pla2g7        | 7 | 41.9   | 98.1   | 2246.7 | 3852.3 | 4400.6 | 3653.9 | 5172.1 | 5486.2 | 237.8  | 1.3  | 1.3  | 31.1 | 52.3 | 60.7 | 49.0 | 66.9 | 75.6 | 3.2  |
| Cap2          | 7 | 192.5  | 572.4  | 1372.3 | 1317.5 | 2114.1 | 1808.9 | 1779.3 | 1112.4 | 1270.8 | 1.7  | 4.5  | 13.3 | 12.1 | 18.8 | 16.6 | 16.4 | 10.0 | 11.6 |
| Ceacam10      | 7 | 23.0   | 20.8   | 21.8   | 1282.4 | 1089.4 | 721.8  | 930.9  | 849.9  | 664.1  | 1.7  | 1.1  | 1.0  | 65.5 | 57.6 | 36.7 | 50.7 | 42.2 | 33.8 |
| Npnt          | 7 | 799.0  | 750.3  | 659.0  | 1297.9 | 1124.7 | 673.2  | 1178.3 | 530.5  | 891.9  | 6.2  | 4.4  | 4.3  | 9.8  | 7.6  | 5.2  | 9.0  | 4.3  | 6.9  |
| Efcab1        | 7 | 99.2   | 283.9  | 717.6  | 1283.2 | 964.7  | 945.7  | 958.0  | 821.2  | 113.9  | 1.9  | 4.1  | 11.7 | 22.9 | 17.4 | 16.3 | 16.3 | 14.3 | 1.9  |
| Lgi2          | 7 | 69.8   | 58.1   | 230.9  | 1364.9 | 1393.1 | 1560.7 | 1417.9 | 1282.8 | 246.8  | 1.5  | 1.1  | 4.1  | 30.0 | 30.0 | 33.8 | 31.1 | 29.3 | 5.3  |
| Sptb          | 7 | 108.9  | 171.3  | 515.8  | 752.1  | 1223.9 | 576.7  | 1419.3 | 1164.6 | 680.0  | 1.2  | 1.9  | 6.9  | 11.8 | 16.8 | 8.0  | 19.9 | 14.0 | 9.5  |
| Zfp536        | 7 | 216.8  | 204.5  | 356.4  | 491.8  | 674.3  | 628.2  | 753.3  | 283.7  | 306.3  | 3.4  | 3.3  | 5.6  | 8.0  | 10.9 | 10.4 | 12.2 | 5.1  | 5.1  |
| Chrng         | 7 | 64.1   | 258.8  | 1264.9 | 1999.2 | 2381.0 | 1490.9 | 2554.9 | 1617.0 | 162.2  | 1.2  | 3.3  | 17.5 | 27.8 | 33.6 | 20.9 | 35.7 | 20.7 | 2.3  |
| C030009J22Rik | 7 | 10.7   | 8.9    | 46.4   | 171.3  | 199.7  | 269.1  | 234.4  | 77.2   | 109.4  | 1.3  | -1.0 | 4.2  | 19.5 | 23.2 | 30.4 | 26.0 | 9.5  | 12.4 |
| Teerl         | 7 | 67.7   | 87.2   | 89.6   | 262.6  | 323.6  | 368.6  | 413.4  | 283.9  | 61.0   | 2.3  | 3.4  | 3.6  | 10.5 | 13.1 | 15.1 | 16.7 | 11.5 | 2.5  |
| Pygm          | 7 | 38.9   | 33.2   | 184.1  | 1697.9 | 1251.6 | 1301.6 | 1306.5 | 1370.6 | 182.1  | -1.2 | 1.0  | 4.3  | 50.2 | 33.5 | 35.6 | 36.3 | 34.6 | 5.1  |
| Pgam2         | 7 | 56.2   | 99.8   | 824.9  | 3373.2 | 4488.0 | 5719.7 | 5255.9 | 4917.7 | 1303.3 | -1.8 | -1.3 | 5.0  | 20.0 | 26.3 | 34.4 | 32.2 | 30.2 | 7.8  |
| Gcg           | 7 | 11.9   | 21.1   | 573.7  | 1429.6 | 2423.6 | 913.5  | 3111.8 | 871.0  | 52.0   | -1.2 | -1.3 | 18.4 | 47.1 | 72.8 | 30.4 | 99.9 | 28.3 | 1.7  |
| Col4a2        | 7 | 1054.6 | 1861.8 | 2672.3 | 3007.6 | 3320.3 | 3404.9 | 3829.0 | 2900.6 | 1404.4 | 2.3  | 3.9  | 5.8  | 6.6  | 7.0  | 7.5  | 8.2  | 6.4  | 3.1  |
| Col4a1        | 7 | 3237.3 | 5728.2 | 8030.3 | 7587.1 | 8523.5 | 7431.4 | 8831.3 | 5604.7 | 5745.6 | 2.6  | 4.7  | 6.3  | 6.0  | 6.6  | 5.9  | 6.8  | 4.5  | 4.6  |
| Abcc8         | 7 | 104.5  | 184.4  | 278.5  | 328.2  | 479.6  | 540.4  | 622.3  | 518.6  | 84.0   | 2.4  | 3.8  | 5.6  | 7.1  | 10.0 | 11.1 | 13.1 | 9.5  | 1.7  |
| Arnt2         | 7 | 16.0   | 19.6   | 107.9  | 296.9  | 84.4   | 131.7  | 73.3   | 122.0  | 26.1   | 1.4  | 2.0  | 11.2 | 32.2 | 9.1  | 13.8 | 7.5  | 12.3 | 2.7  |
| Gget          | 7 | 79.3   | 86.8   | 174.5  | 3122.9 | 2806.1 | 1687.6 | 3278.5 | 2388.4 | 670.0  | 1.1  | -1.1 | 1.9  | 35.3 | 30.3 | 19.3 | 37.8 | 28.1 | 7.7  |

|                   |   |       |       |        |        |        |        |        |        |        |      |      |      |      |      |      |      |      |      |
|-------------------|---|-------|-------|--------|--------|--------|--------|--------|--------|--------|------|------|------|------|------|------|------|------|------|
| Optn              | 7 | 48.5  | 36.3  | 60.3   | 745.7  | 666.3  | 360.2  | 896.7  | 538.8  | 281.3  | 1.6  | 1.1  | 1.7  | 22.0 | 20.2 | 10.6 | 25.6 | 15.9 | 8.4  |
| Drd4              | 7 | 54.9  | 69.7  | 304.4  | 620.5  | 737.3  | 535.6  | 716.0  | 517.9  | 256.4  | 1.1  | 1.3  | 6.0  | 12.5 | 14.5 | 10.3 | 13.8 | 9.6  | 4.9  |
| Ctsf              | 7 | 267.2 | 480.2 | 647.6  | 457.5  | 489.9  | 658.3  | 613.6  | 592.8  | 463.5  | 2.4  | 4.3  | 6.4  | 4.2  | 4.7  | 6.1  | 5.8  | 5.5  | 4.3  |
| E130119<br>H09Rik | 7 | 40.2  | 28.7  | 39.2   | 1262.3 | 1246.0 | 1195.6 | 980.6  | 825.2  | 608.6  | 1.2  | -1.4 | 1.0  | 32.9 | 35.3 | 32.4 | 27.2 | 20.3 | 16.5 |
| Sptbn2            | 7 | 347.0 | 883.7 | 1192.1 | 733.8  | 1066.6 | 924.0  | 1199.4 | 965.6  | 813.1  | 2.0  | 4.3  | 6.2  | 3.9  | 5.7  | 4.8  | 6.3  | 4.7  | 4.2  |
| Stx11             | 7 | 10.8  | 13.6  | 14.6   | 485.9  | 645.7  | 556.9  | 861.4  | 593.7  | 349.0  | -1.4 | -1.3 | -1.2 | 28.7 | 37.6 | 32.3 | 50.7 | 34.0 | 20.3 |
| Tom1              | 7 | 475.7 | 517.8 | 1972.1 | 3713.3 | 4752.1 | 2764.7 | 4721.6 | 2352.0 | 2080.7 | 1.5  | 1.3  | 5.4  | 10.2 | 13.3 | 7.7  | 13.4 | 6.3  | 5.8  |
| E330034<br>G19Rik | 7 | 42.0  | 21.2  | 27.1   | 711.7  | 553.3  | 631.0  | 1038.2 | 580.6  | 37.1   | 1.6  | 1.0  | 1.5  | 28.6 | 25.9 | 28.3 | 41.4 | 26.3 | 1.7  |
| Cspg5             | 7 | 161.1 | 267.4 | 420.9  | 631.1  | 421.3  | 277.6  | 513.4  | 659.6  | 353.9  | 2.0  | 3.7  | 5.9  | 8.1  | 5.7  | 3.7  | 7.0  | 8.8  | 4.8  |
| Tmprs5            | 7 | 39.1  | 46.8  | 86.7   | 319.0  | 383.1  | 365.9  | 489.7  | 261.2  | 79.6   | 1.3  | 1.6  | 2.8  | 10.6 | 13.0 | 12.3 | 16.3 | 8.2  | 2.6  |
| Casp7             | 7 | 175.6 | 223.0 | 418.8  | 2150.6 | 1717.1 | 2047.1 | 2157.4 | 1905.2 | 589.5  | 1.3  | 1.4  | 2.6  | 14.1 | 11.2 | 13.3 | 13.8 | 12.5 | 3.8  |
| Rnf123            | 7 | 176.1 | 208.7 | 590.2  | 1455.9 | 1904.9 | 1048.4 | 2130.8 | 1773.0 | 205.8  | 1.4  | 1.6  | 4.3  | 11.2 | 14.2 | 7.7  | 16.0 | 12.1 | 1.5  |
| Dgkg              | 7 | 37.6  | 62.7  | 70.8   | 285.9  | 226.4  | 203.3  | 252.8  | 84.0   | 154.5  | 1.6  | 2.2  | 2.5  | 10.8 | 8.5  | 7.4  | 9.4  | 2.7  | 5.7  |
| Pyroxd2           | 7 | 32.1  | 66.7  | 164.8  | 159.7  | 178.4  | 272.3  | 198.7  | 154.1  | 116.8  | 1.3  | 2.0  | 5.7  | 5.5  | 6.2  | 9.5  | 6.9  | 5.1  | 4.1  |
| Myo7b             | 7 | 50.7  | 87.3  | 149.4  | 642.0  | 1109.7 | 395.6  | 1089.6 | 825.2  | 69.1   | 1.1  | 1.7  | 3.0  | 13.5 | 23.4 | 8.0  | 22.0 | 14.6 | 1.4  |
| Nlrc5             | 7 | 23.8  | 20.6  | 23.2   | 341.1  | 437.0  | 529.6  | 351.6  | 173.4  | 124.5  | 1.2  | 1.1  | -1.0 | 15.7 | 19.9 | 24.8 | 17.1 | 9.0  | 5.8  |
| Pdlim7            | 7 | 386.8 | 648.9 | 1662.5 | 3170.0 | 3588.3 | 2754.0 | 3438.9 | 3203.1 | 680.6  | 1.3  | 2.2  | 4.4  | 9.2  | 10.0 | 7.8  | 10.0 | 8.9  | 2.0  |
| Gm3515            | 7 | 224.3 | 39.8  | 73.7   | 1105.1 | 1267.4 | 1621.3 | 836.4  | 440.0  | 233.5  | 3.4  | -2.0 | 1.3  | 17.0 | 20.9 | 27.5 | 14.3 | 8.3  | 4.0  |
| 6030439<br>D06Rik | 7 | 141.7 | 108.9 | 109.1  | 96.9   | 285.2  | 302.9  | 576.9  | 182.7  | 123.9  | 2.9  | 2.4  | 2.4  | 2.5  | 6.6  | 6.8  | 12.4 | 4.1  | 2.8  |
| Tmprs11<br>c      | 7 | 7.8   | 8.2   | 6.6    | 430.8  | 247.6  | 248.0  | 181.8  | 117.4  | 20.0   | 1.1  | 1.0  | -1.0 | 56.6 | 30.6 | 32.1 | 22.3 | 16.6 | 2.4  |
| Syt11             | 7 | 151.3 | 592.1 | 1323.0 | 2087.6 | 1811.0 | 1714.8 | 2002.9 | 526.9  | 640.7  | -1.4 | 2.0  | 5.4  | 8.9  | 7.8  | 7.3  | 8.5  | 2.2  | 2.8  |
| Nipal3            | 7 | 59.7  | 91.1  | 189.7  | 327.0  | 1361.3 | 225.0  | 1347.2 | 218.5  | 236.6  | -1.1 | 1.5  | 2.8  | 5.4  | 21.9 | 3.5  | 21.2 | 3.4  | 3.7  |
| Fgfr1l            | 7 | 344.6 | 649.0 | 1303.9 | 3241.4 | 5075.4 | 2854.5 | 5911.6 | 2108.0 | 1361.8 | -1.1 | 1.3  | 2.7  | 7.7  | 12.8 | 7.1  | 14.5 | 5.1  | 3.4  |
| Hlcs              | 7 | 84.2  | 155.0 | 324.1  | 297.8  | 313.0  | 240.4  | 292.3  | 255.3  | 176.7  | 1.5  | 2.6  | 5.4  | 5.1  | 5.2  | 4.2  | 5.1  | 4.6  | 3.1  |
| Sdk2              | 7 | 31.5  | 95.5  | 179.0  | 1141.4 | 902.6  | 587.8  | 1015.8 | 562.4  | 161.2  | -1.7 | 1.3  | 2.7  | 17.4 | 13.6 | 8.7  | 14.1 | 7.4  | 2.4  |
| Tmec3             | 7 | 103.6 | 106.6 | 747.7  | 1274.4 | 1294.8 | 1184.5 | 1281.1 | 673.6  | 767.8  | -1.2 | -1.7 | 5.0  | 9.1  | 9.6  | 8.7  | 9.3  | 5.1  | 5.6  |



|               |   |      |       |       |        |        |        |        |        |       |      |      |      |      |      |      |      |      |      |
|---------------|---|------|-------|-------|--------|--------|--------|--------|--------|-------|------|------|------|------|------|------|------|------|------|
| Rsph3a        | 7 | 31.1 | 42.1  | 97.1  | 281.9  | 168.7  | 104.3  | 175.7  | 48.3   | 97.8  | 1.5  | 2.0  | 4.2  | 11.9 | 7.5  | 4.5  | 7.5  | 2.4  | 4.3  |
| Cckbr         | 7 | 25.2 | 41.6  | 63.5  | 237.9  | 312.0  | 209.5  | 579.2  | 484.9  | 59.5  | -1.1 | 1.4  | 2.3  | 7.2  | 9.7  | 6.8  | 19.2 | 14.8 | 1.9  |
| Ggaet         | 7 | 35.8 | 36.9  | 58.2  | 332.0  | 263.3  | 365.1  | 298.6  | 211.6  | 135.8 | 1.3  | 1.1  | 1.9  | 10.5 | 7.7  | 11.0 | 9.0  | 6.1  | 4.0  |
| Gtsf1         | 7 | 16.9 | 21.1  | 23.2  | 251.1  | 292.2  | 322.9  | 360.3  | 209.1  | 101.6 | -1.4 | -1.1 | -1.0 | 10.6 | 12.8 | 14.5 | 16.0 | 9.9  | 4.5  |
| Fam189a1      | 7 | 21.3 | 54.4  | 60.6  | 396.8  | 411.5  | 316.1  | 403.3  | 178.4  | 260.2 | -1.6 | 1.3  | 1.6  | 10.4 | 10.5 | 8.4  | 10.6 | 4.9  | 6.9  |
| Hspb6         | 7 | 22.5 | 40.1  | 41.8  | 159.5  | 235.2  | 284.1  | 416.1  | 170.2  | 160.0 | -1.2 | 1.3  | 1.0  | 4.8  | 7.3  | 8.7  | 12.9 | 5.3  | 4.8  |
| Hspb3         | 7 | 24.6 | 47.4  | 137.8 | 618.8  | 721.6  | 751.7  | 772.9  | 745.9  | 142.5 | -1.7 | -1.2 | 2.3  | 10.4 | 12.4 | 12.8 | 13.1 | 12.0 | 2.4  |
| Pappa         | 7 | 12.1 | 11.1  | 13.7  | 358.1  | 428.2  | 444.9  | 555.8  | 248.3  | 198.7 | -2.5 | -3.2 | -2.2 | 11.4 | 12.6 | 13.1 | 17.1 | 8.2  | 5.9  |
| Unc13c        | 7 | 21.9 | 16.9  | 80.4  | 299.5  | 311.5  | 182.3  | 244.9  | 88.5   | 27.5  | 1.2  | -1.3 | 3.1  | 14.7 | 13.4 | 8.7  | 11.6 | 4.1  | 1.3  |
| Bmper         | 7 | 57.0 | 265.5 | 833.7 | 1713.6 | 1841.9 | 862.6  | 1759.7 | 648.8  | 329.0 | -1.9 | 1.4  | 5.7  | 11.6 | 12.9 | 6.0  | 11.9 | 4.5  | 2.3  |
| Rgs8          | 7 | 45.6 | 57.8  | 312.8 | 633.2  | 358.7  | 179.3  | 199.9  | 173.5  | 181.3 | -1.6 | 1.2  | 6.1  | 12.1 | 6.6  | 3.5  | 4.1  | 3.6  | 3.5  |
| Lrrtm2        | 7 | 16.5 | 12.4  | 24.8  | 358.3  | 261.4  | 150.4  | 339.3  | 142.8  | 111.1 | -1.2 | -1.6 | 1.2  | 15.1 | 12.6 | 7.0  | 16.1 | 6.9  | 5.3  |
| Scn11a        | 7 | 22.2 | 24.5  | 115.9 | 421.3  | 212.7  | 135.9  | 170.1  | 64.0   | 28.1  | 1.0  | 1.3  | 5.3  | 17.3 | 9.9  | 6.3  | 7.9  | 2.7  | 1.3  |
| Cabp5         | 7 | 31.2 | 41.4  | 39.0  | 350.5  | 536.7  | 188.0  | 573.9  | 224.5  | 102.8 | -1.1 | 1.1  | 1.0  | 8.7  | 14.6 | 5.1  | 15.8 | 6.0  | 2.8  |
| Sle46a3       | 7 | 19.1 | 28.6  | 28.4  | 283.8  | 348.7  | 204.6  | 447.7  | 217.8  | 48.5  | -1.1 | 1.0  | 1.2  | 11.9 | 14.7 | 8.3  | 17.3 | 8.3  | 1.9  |
| 1300017J02Rik | 7 | 72.3 | 138.5 | 704.2 | 1024.6 | 1679.7 | 840.9  | 1449.9 | 877.8  | 168.2 | -1.7 | 1.1  | 4.9  | 8.5  | 13.3 | 6.7  | 11.2 | 7.1  | 1.3  |
| Ceacam1       | 7 | 16.9 | 17.3  | 19.6  | 105.6  | 168.9  | 64.9   | 199.6  | 127.5  | 30.4  | 1.2  | 1.2  | 1.3  | 6.9  | 11.3 | 4.2  | 13.2 | 8.5  | 2.0  |
| Atp13a5       | 7 | 9.8  | 9.8   | 11.1  | 87.0   | 68.6   | 114.4  | 86.4   | 61.0   | 12.2  | 1.3  | 1.1  | 1.4  | 8.8  | 8.0  | 13.3 | 9.4  | 7.4  | 1.4  |
| Syn2          | 7 | 40.4 | 49.5  | 218.6 | 228.2  | 339.4  | 394.7  | 594.3  | 207.8  | 54.2  | -1.3 | -1.0 | 5.4  | 5.3  | 7.6  | 9.2  | 15.1 | 4.5  | 1.3  |
| Ccde109b      | 7 | 12.3 | 11.9  | 9.7   | 94.9   | 235.0  | 80.1   | 282.4  | 243.8  | 62.6  | -1.6 | -1.5 | -1.3 | 5.2  | 13.9 | 4.4  | 15.3 | 13.4 | 3.5  |
| Ankrd66       | 7 | 18.0 | 15.4  | 17.9  | 201.0  | 177.6  | 194.8  | 173.6  | 216.2  | 25.3  | 1.0  | 1.1  | -1.0 | 11.3 | 9.4  | 11.2 | 10.6 | 12.0 | 1.4  |
| Rgs5          | 7 | 12.6 | 18.1  | 26.3  | 2242.6 | 1991.5 | 2398.9 | 2713.1 | 1745.6 | 67.4  | -9.8 | -8.5 | -6.7 | 15.2 | 13.7 | 14.7 | 18.5 | 11.8 | -2.4 |
| Rmst          | 7 | 21.5 | 13.2  | 15.4  | 64.9   | 155.6  | 119.5  | 169.3  | 18.7   | 37.9  | 1.5  | -1.1 | 1.1  | 4.9  | 11.8 | 8.4  | 12.1 | 1.3  | 2.7  |
| Uox           | 7 | 20.1 | 22.2  | 26.1  | 231.4  | 292.6  | 22.2   | 440.5  | 224.5  | 119.6 | -1.3 | 1.1  | -1.0 | 9.4  | 12.0 | -1.2 | 16.7 | 8.6  | 4.8  |
| Wdr66         | 7 | 36.0 | 16.9  | 20.9  | 80.1   | 99.7   | 77.3   | 129.7  | 224.4  | 26.9  | 1.4  | -1.4 | -1.1 | 3.6  | 4.2  | 3.3  | 5.6  | 9.1  | 1.1  |
| Rab42         | 7 | 23.8 | 22.3  | 32.6  | 327.6  | 67.9   | 110.3  | 27.4   | 51.6   | 28.5  | 1.1  | -1.0 | 1.6  | 11.8 | 2.7  | 4.5  | 1.2  | 2.2  | 1.2  |

|         |    |        |        |        |        |        |        |        |        |        |       |       |       |        |       |       |       |       |      |
|---------|----|--------|--------|--------|--------|--------|--------|--------|--------|--------|-------|-------|-------|--------|-------|-------|-------|-------|------|
| Gje1    | 8  | 41.6   | 600.6  | 4153.5 | 5535.8 | 2896.5 | 3166.2 | 2760.8 | 2435.9 | 206.0  | 19.2  | 69.5  | 742.9 | 1074.2 | 550.7 | 606.8 | 527.1 | 465.0 | 39.5 |
| Sox1    | 8  | 571.2  | 1216.4 | 1898.7 | 2324.3 | 1111.7 | 1292.7 | 1267.6 | 880.6  | 730.3  | 10.0  | 16.1  | 26.0  | 36.2   | 17.4  | 20.1  | 19.9  | 13.8  | 11.2 |
| Maf     | 8  | 6058.7 | 6137.9 | 7648.7 | 7956.6 | 4558.9 | 6626.4 | 4931.3 | 4056.6 | 4087.5 | 13.3  | 12.9  | 17.1  | 18.8   | 11.1  | 15.7  | 11.8  | 9.6   | 9.7  |
| Med12l  | 8  | 514.2  | 736.1  | 880.4  | 978.8  | 725.4  | 1065.3 | 660.8  | 352.8  | 320.6  | 6.5   | 8.3   | 11.6  | 12.4   | 9.6   | 14.2  | 8.6   | 4.6   | 4.3  |
| Ctnd2   | 8  | 940.0  | 899.2  | 1386.7 | 1931.6 | 1262.2 | 1945.0 | 1146.2 | 879.6  | 520.0  | 6.4   | 6.1   | 9.7   | 13.9   | 8.6   | 13.2  | 8.1   | 6.3   | 3.5  |
| Kcne1   | 8  | 74.4   | 98.1   | 94.0   | 165.8  | 117.9  | 115.4  | 78.0   | 65.3   | 32.0   | 5.4   | 7.1   | 6.6   | 11.4   | 7.9   | 8.0   | 5.4   | 4.5   | 2.2  |
| Eid4    | 8  | 611.8  | 682.7  | 722.3  | 1013.7 | 614.2  | 819.3  | 610.5  | 271.9  | 538.9  | 5.3   | 5.3   | 6.1   | 8.2    | 5.0   | 6.8   | 5.1   | 2.3   | 4.5  |
| Stxbp6  | 8  | 238.2  | 527.8  | 1000.5 | 1499.1 | 1062.9 | 1337.4 | 1128.5 | 202.3  | 337.2  | 2.0   | 2.8   | 7.8   | 12.4   | 8.7   | 10.9  | 9.3   | 1.6   | 2.7  |
| Map6d1  | 8  | 43.4   | 57.5   | 166.0  | 229.8  | 130.3  | 93.9   | 90.7   | 60.8   | 46.9   | 1.5   | 2.0   | 5.6   | 7.6    | 4.4   | 3.2   | 3.1   | 2.2   | 1.6  |
| Pik3cd  | 8  | 268.5  | 392.4  | 377.5  | 6218.8 | 161.2  | 5347.8 | 169.4  | 642.7  | 285.7  | -1.1  | 1.2   | 1.2   | 22.4   | -1.9  | 17.2  | -1.8  | 1.9   | -1.1 |
| Aldh1a7 | 9  | 3452.0 | 2987.7 | 2558.7 | 3632.1 | 4205.7 | 2563.7 | 3469.4 | 2067.0 | 1334.6 | 116.3 | 101.4 | 90.1  | 123.4  | 134.3 | 88.1  | 121.5 | 74.5  | 45.8 |
| Cntn6   | 9  | 73.7   | 183.4  | 207.4  | 253.4  | 227.8  | 286.9  | 281.0  | 135.8  | 72.5   | 5.5   | 11.1  | 14.9  | 18.2   | 16.8  | 20.5  | 19.9  | 10.3  | 5.0  |
| Col4a6  | 9  | 450.4  | 837.9  | 1194.0 | 1038.1 | 1080.3 | 1091.5 | 1101.7 | 65.6   | 276.8  | 9.9   | 15.1  | 25.5  | 22.0   | 22.7  | 22.8  | 23.7  | 1.4   | 5.8  |
| Adamsl4 | 9  | 111.6  | 230.5  | 194.1  | 357.3  | 291.4  | 175.2  | 291.4  | 141.4  | 144.9  | 5.1   | 9.6   | 7.7   | 14.3   | 10.9  | 6.7   | 11.0  | 5.5   | 5.5  |
| Ssx2ip  | 9  | 1751.7 | 2423.8 | 3532.5 | 4119.8 | 5843.5 | 3670.0 | 5345.2 | 3044.4 | 1314.4 | 3.8   | 5.0   | 6.6   | 8.3    | 11.5  | 7.4   | 10.8  | 6.4   | 2.6  |
| Jag1    | 9  | 3203.7 | 3525.9 | 3806.0 | 3330.1 | 3425.4 | 3705.2 | 3179.0 | 1458.3 | 1171.5 | 6.5   | 6.9   | 7.4   | 6.7    | 6.9   | 7.4   | 6.3   | 2.9   | 2.3  |
| Trpc6   | 9  | 12.5   | 27.5   | 96.2   | 192.1  | 200.9  | 111.1  | 116.5  | 69.7   | 14.2   | 1.4   | 2.5   | 9.7   | 19.3   | 20.6  | 11.0  | 11.9  | 7.2   | 1.4  |
| Mafg    | 9  | 614.4  | 649.1  | 1049.0 | 1101.9 | 1056.8 | 1015.0 | 953.2  | 508.5  | 259.3  | 3.5   | 4.4   | 6.5   | 7.0    | 6.3   | 6.2   | 5.9   | 3.0   | 1.6  |
| Cyyr1   | 9  | 71.3   | 83.9   | 173.8  | 1125.0 | 839.2  | 512.6  | 773.4  | 319.7  | 20.5   | 1.2   | 1.1   | 2.5   | 15.3   | 11.4  | 7.2   | 9.9   | 4.5   | -3.5 |
| Ptgfr   | 9  | 20.8   | 57.1   | 81.9   | 131.4  | 262.1  | 100.6  | 148.7  | 105.1  | 21.9   | 1.0   | 1.9   | 3.2   | 5.2    | 11.0  | 4.0   | 5.6   | 3.7   | -1.2 |
| Map7    | 10 | 1161.5 | 2233.0 | 2104.3 | 1201.0 | 1370.5 | 1090.1 | 1528.1 | 1156.4 | 1145.8 | 18.5  | 30.8  | 31.2  | 18.8   | 21.5  | 16.6  | 22.7  | 17.2  | 17.4 |
| Bel2l13 | 10 | 1070.8 | 1396.1 | 1902.7 | 1318.8 | 1371.5 | 1004.2 | 1344.1 | 1157.6 | 1031.0 | 4.1   | 5.2   | 6.8   | 5.1    | 5.1   | 3.8   | 5.1   | 4.3   | 3.9  |
| Tpra1   | 10 | 479.2  | 859.9  | 925.4  | 518.7  | 725.9  | 541.3  | 639.2  | 381.0  | 333.7  | 3.6   | 6.1   | 6.8   | 3.8    | 5.5   | 4.0   | 4.6   | 2.9   | 2.5  |
| Fam105a | 10 | 145.2  | 252.7  | 213.5  | 210.7  | 237.8  | 135.7  | 239.4  | 189.4  | 184.4  | 2.8   | 4.6   | 4.0   | 3.9    | 4.1   | 2.4   | 4.3   | 3.4   | 3.2  |
| Cpne7   | 10 | 223.6  | 564.9  | 617.8  | 195.4  | 154.2  | 163.7  | 149.4  | 204.1  | 49.8   | 5.9   | 13.6  | 14.0  | 4.7    | 3.7   | 3.8   | 3.6   | 4.5   | 1.2  |
| Zfp385a | 10 | 410.0  | 986.9  | 954.0  | 601.1  | 429.2  | 220.9  | 407.4  | 530.7  | 395.2  | 2.9   | 6.2   | 6.9   | 4.5    | 3.1   | 1.5   | 2.9   | 3.6   | 2.8  |

|                   |    |        |        |        |        |       |        |       |       |        |     |     |      |      |      |      |      |      |      |
|-------------------|----|--------|--------|--------|--------|-------|--------|-------|-------|--------|-----|-----|------|------|------|------|------|------|------|
| Gbf1              | 10 | 455.1  | 544.1  | 587.3  | 414.1  | 474.5 | 387.8  | 487.4 | 444.1 | 262.5  | 3.4 | 4.0 | 5.1  | 3.8  | 4.0  | 3.2  | 3.9  | 3.4  | 2.2  |
| Fam43a            | 10 | 224.5  | 556.7  | 696.5  | 192.9  | 153.4 | 74.9   | 95.3  | 44.2  | 42.1   | 2.2 | 4.4 | 6.6  | 1.9  | 1.3  | -1.5 | -1.2 | -2.1 | -2.6 |
| Sipa113           | 11 | 684.3  | 1156.8 | 1222.4 | 1193.2 | 821.1 | 746.5  | 856.1 | 645.6 | 609.7  | 5.8 | 9.3 | 10.3 | 10.0 | 6.5  | 6.1  | 6.9  | 5.2  | 5.0  |
| Lace1             | 11 | 301.2  | 374.7  | 463.0  | 406.7  | 339.8 | 143.8  | 348.6 | 65.6  | 361.6  | 8.0 | 8.1 | 11.2 | 9.9  | 8.2  | 3.5  | 8.2  | 1.7  | 8.7  |
| Man1c1            | 11 | 777.0  | 786.7  | 836.9  | 991.4  | 708.4 | 725.8  | 794.1 | 582.6 | 588.6  | 6.3 | 6.7 | 6.8  | 7.9  | 5.7  | 5.8  | 6.1  | 4.8  | 4.7  |
| Slc25a23          | 11 | 132.0  | 271.2  | 240.1  | 253.9  | 112.1 | 202.8  | 112.6 | 116.7 | 188.0  | 3.3 | 6.6 | 6.5  | 7.2  | 3.2  | 5.7  | 3.1  | 3.3  | 5.3  |
| 5830408B<br>19Rik | 11 | 364.8  | 671.1  | 698.0  | 673.5  | 533.0 | 421.1  | 433.2 | 384.7 | 295.3  | 4.0 | 5.3 | 6.4  | 6.5  | 5.3  | 4.2  | 4.1  | 3.7  | 2.9  |
| Dgkb              | 11 | 118.2  | 166.2  | 159.8  | 102.9  | 73.3  | 79.7   | 46.3  | 51.1  | 176.9  | 5.6 | 6.9 | 8.4  | 5.4  | 3.7  | 4.1  | 2.4  | 2.5  | 9.0  |
| Espn              | 11 | 47.6   | 85.8   | 97.0   | 68.9   | 28.5  | 25.5   | 28.5  | 33.7  | 29.1   | 4.5 | 7.1 | 9.0  | 7.2  | 2.7  | 2.5  | 2.6  | 3.3  | 2.8  |
| Septin8           | 11 | 1160.4 | 1779.4 | 2152.7 | 976.9  | 861.0 | 1008.4 | 825.4 | 672.4 | 1353.3 | 4.1 | 6.0 | 7.0  | 3.3  | 2.9  | 3.4  | 2.8  | 2.3  | 4.5  |
| Msi1              | 11 | 1041.8 | 1583.6 | 1778.7 | 2286.5 | 668.2 | 1171.6 | 802.8 | 696.5 | 431.3  | 2.6 | 4.4 | 5.2  | 6.0  | 1.8  | 3.0  | 2.1  | 1.8  | 1.1  |
| Rgs13             | 11 | 19.2   | 91.3   | 84.3   | 50.1   | 13.1  | 9.7    | 9.8   | 7.2   | 11.0   | 3.1 | 8.7 | 12.8 | 6.6  | 1.8  | 1.4  | 1.4  | 1.1  | 1.6  |
| Spp1              | 11 | 54.0   | 144.5  | 178.6  | 113.4  | 7.8   | 8.3    | 10.5  | 13.3  | 19.0   | 2.5 | 7.4 | 8.0  | 5.0  | -2.8 | -2.6 | -2.1 | -1.6 | -1.1 |
| Cyb561            | 11 | 151.6  | 251.1  | 177.3  | 93.4   | 39.5  | 28.2   | 31.8  | 18.9  | 29.6   | 3.2 | 4.2 | 4.0  | 1.9  | -1.3 | -1.7 | -1.5 | -2.5 | -1.7 |
